# Supplementary material for: Photosensitizer-free, visible light-mediated recyclable gold-catalyzed cross-coupling of aryldiazonium salts and alkynyltrimethylsilanes
Source: Royal Society of Chemistry journal article supplement (doi:10.1039/d3nj02853d), 2023-01-01
Supplement: d3nj02853d1.pdf [file d3nj02853d1.pdf]

## Supporting Information for:

### **Photosensitizer-free, visible light-mediated recyclable gold-catalyzed cross-coupling of aryldiazonium salts and alkynyl-trimethylsilanes**

Jiajia Li, Junmin Chen,\* Hefeng Zhu, Mingzhong Cai\*

*School of Chemistry and Chemical Engineering, Jiangxi Normal University,  
Nanchang, Jiangxi 330022, China*

E-mail: mzcai@jxnu.edu.cn; junminchen@jxnu.edu.cn

**Copies of NMR Spectra of Compounds 3a-3q'**

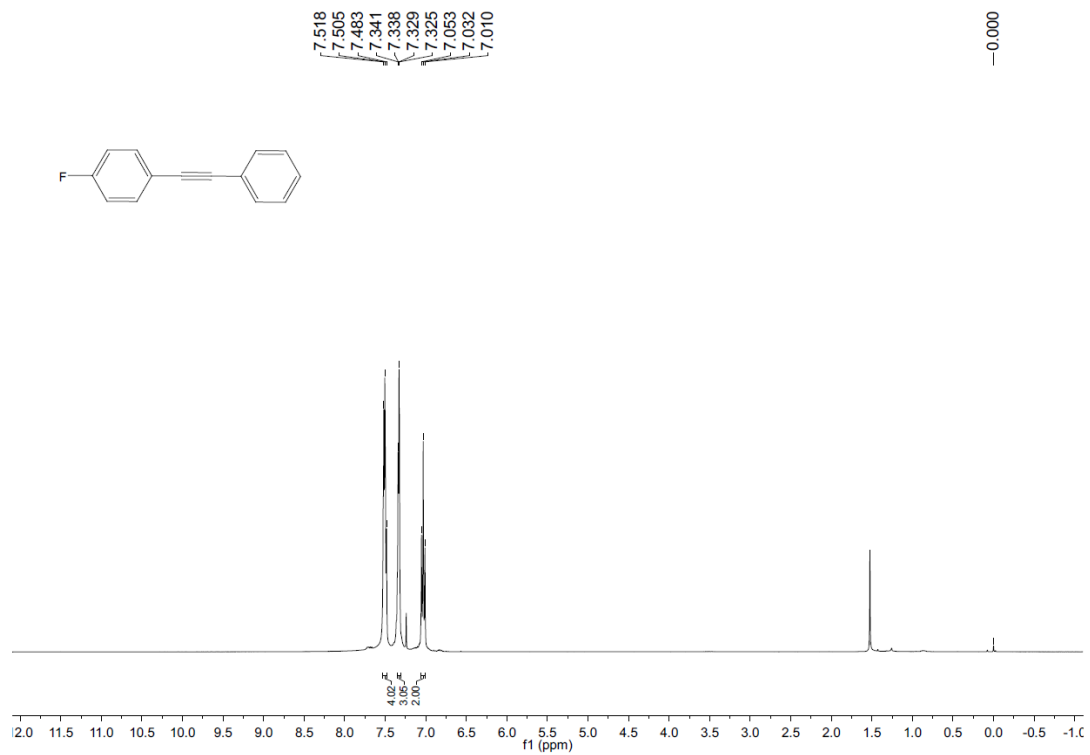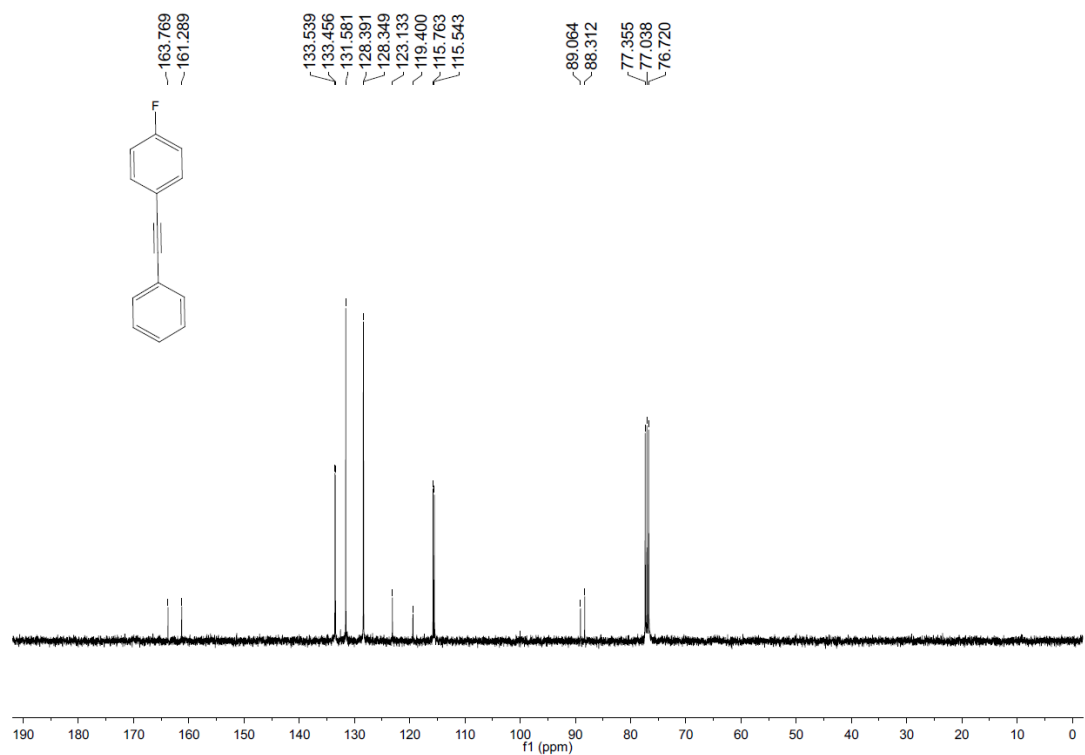

$^1\text{H}$  NMR and  $^{13}\text{C}$  NMR spectra of compounds **3a** (in  $\text{CDCl}_3$ )

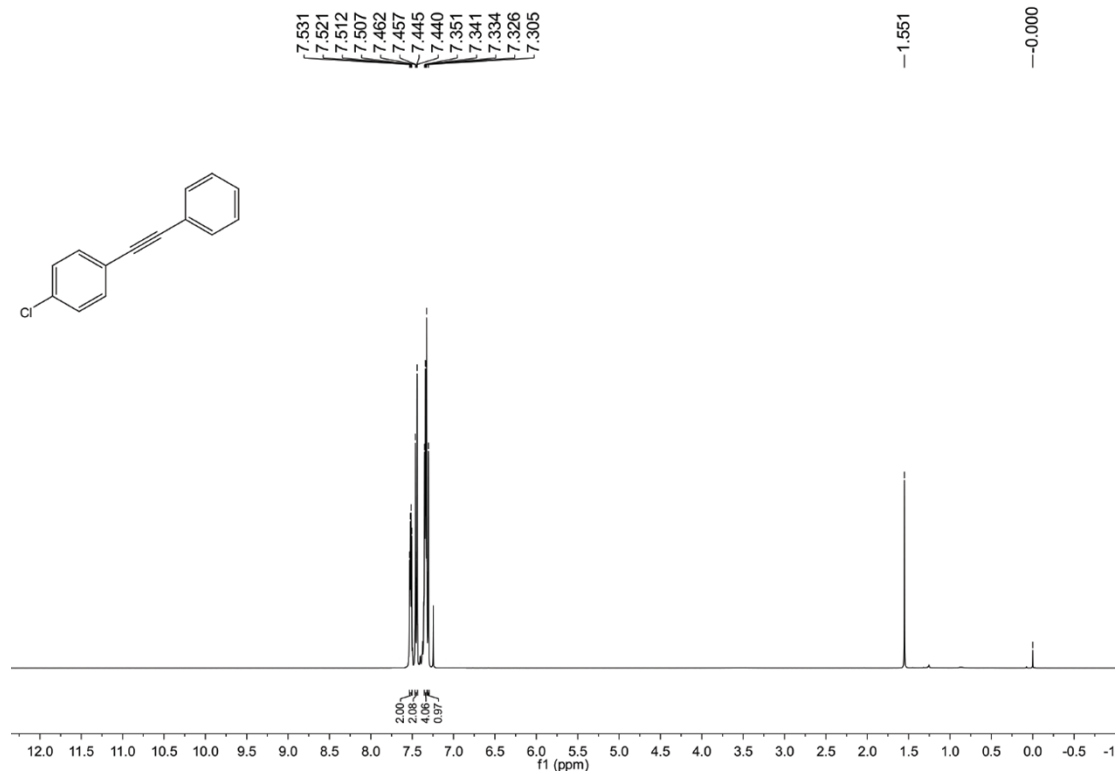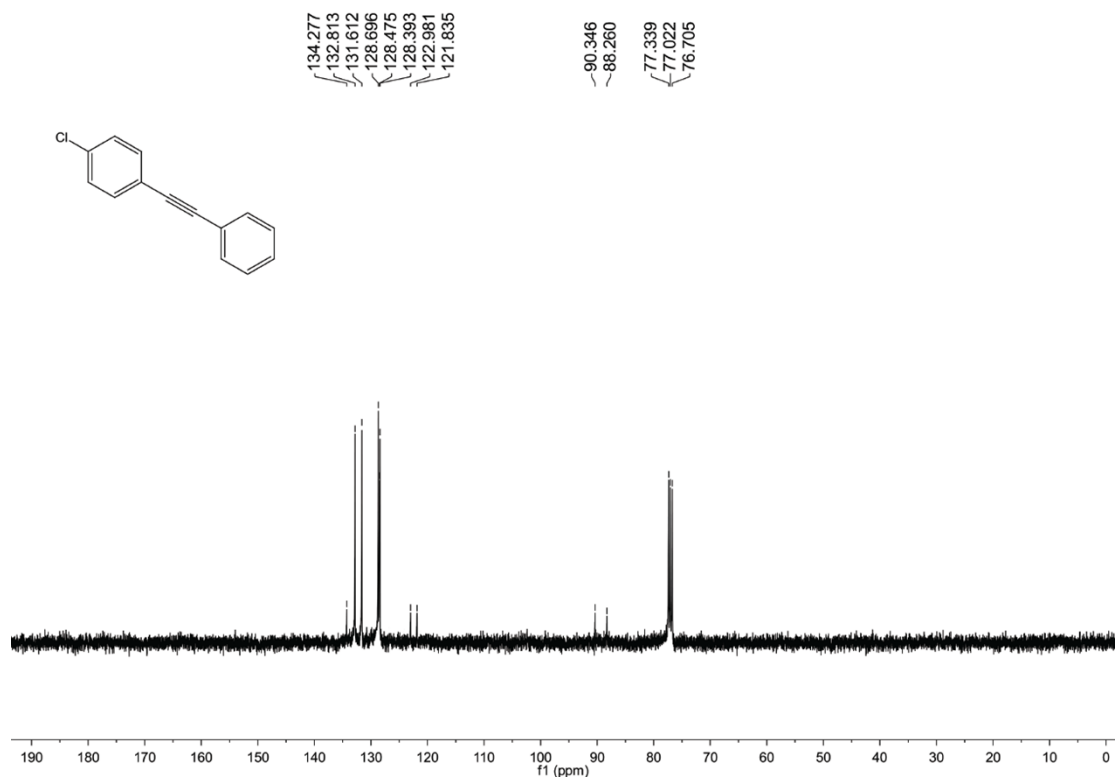

<sup>1</sup>H NMR and <sup>13</sup>C NMR spectra of compounds **3b** (in CDCl<sub>3</sub>)

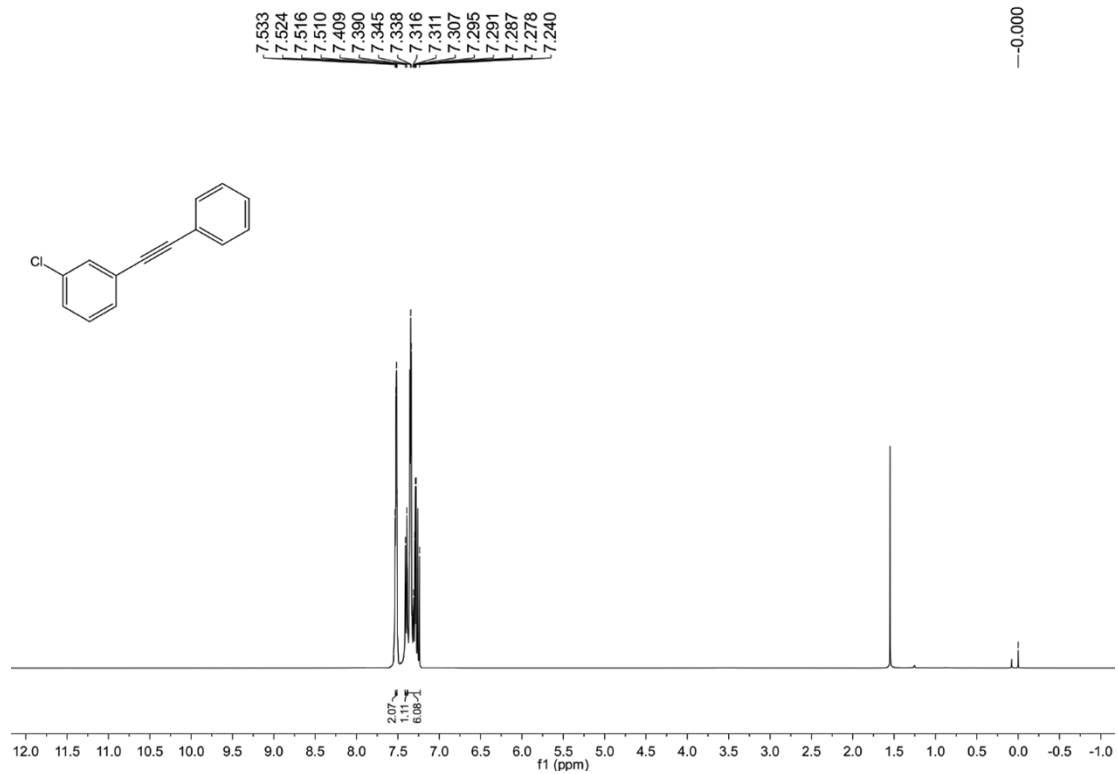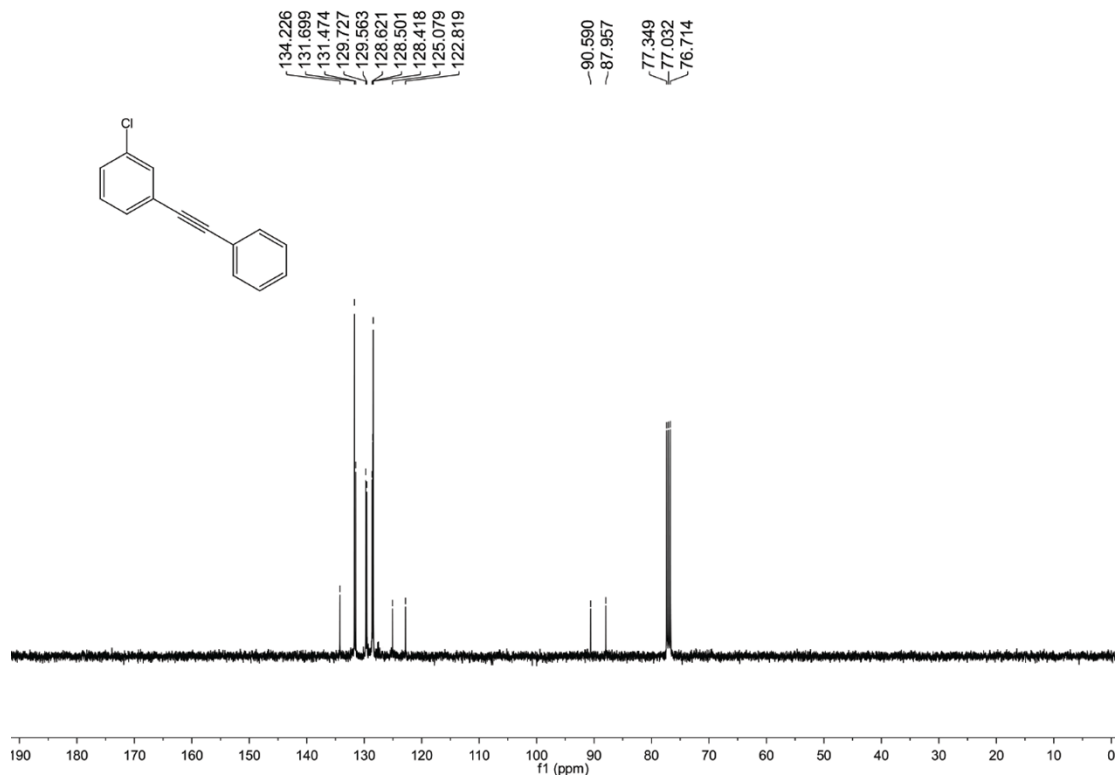

<sup>1</sup>H NMR and <sup>13</sup>C NMR spectra of compounds **3c** (in CDCl<sub>3</sub>)

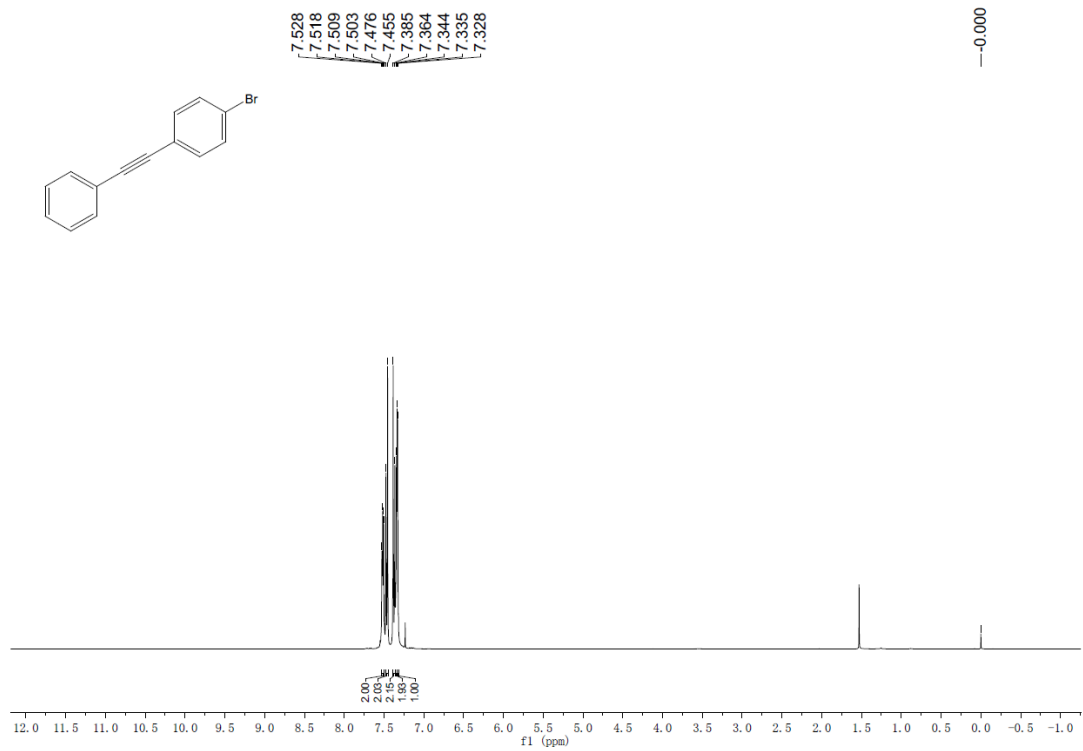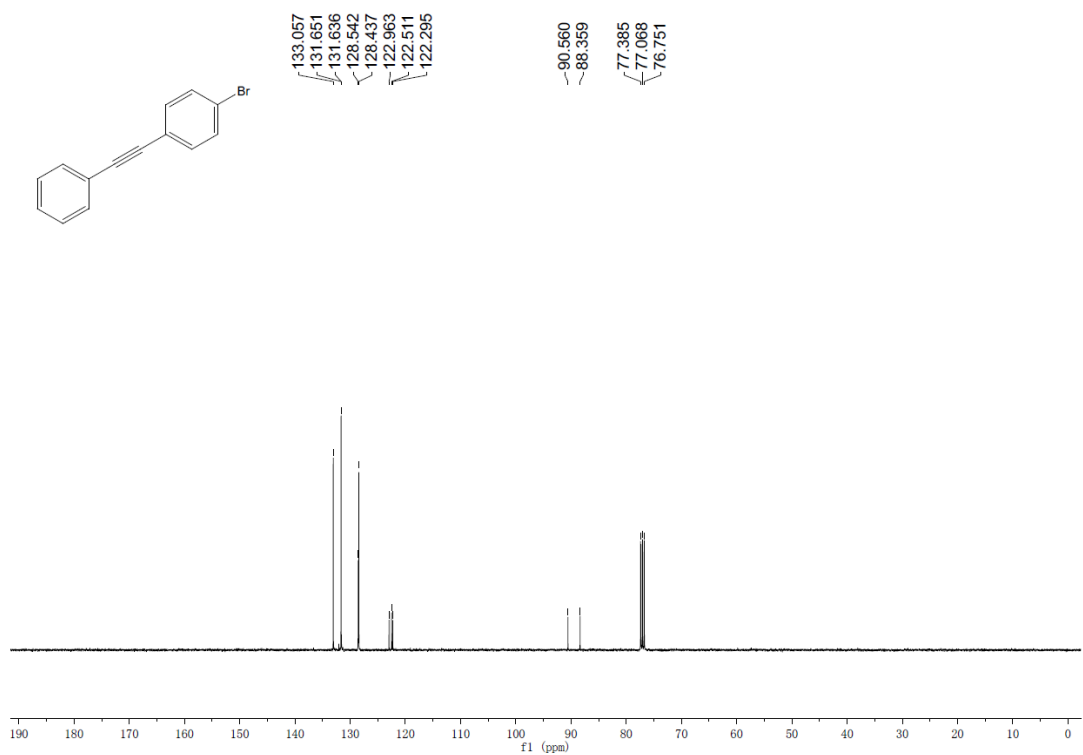

$^1\text{H}$  NMR and  $^{13}\text{C}$  NMR spectra of compounds **3d** (in  $\text{CDCl}_3$ )

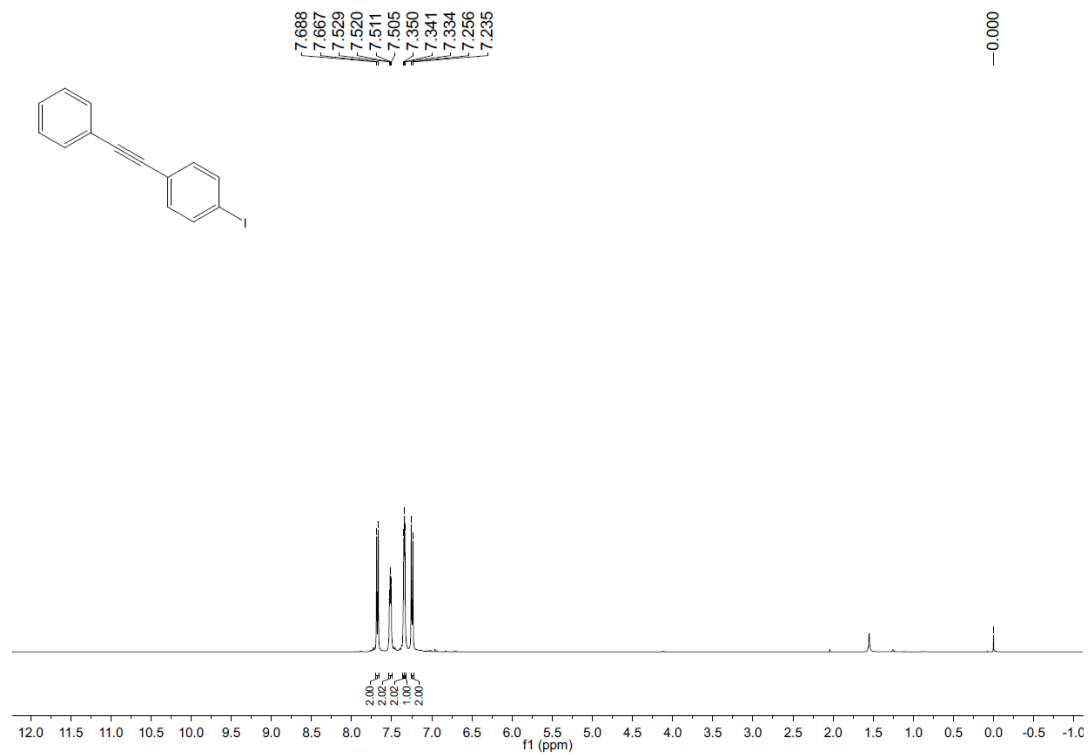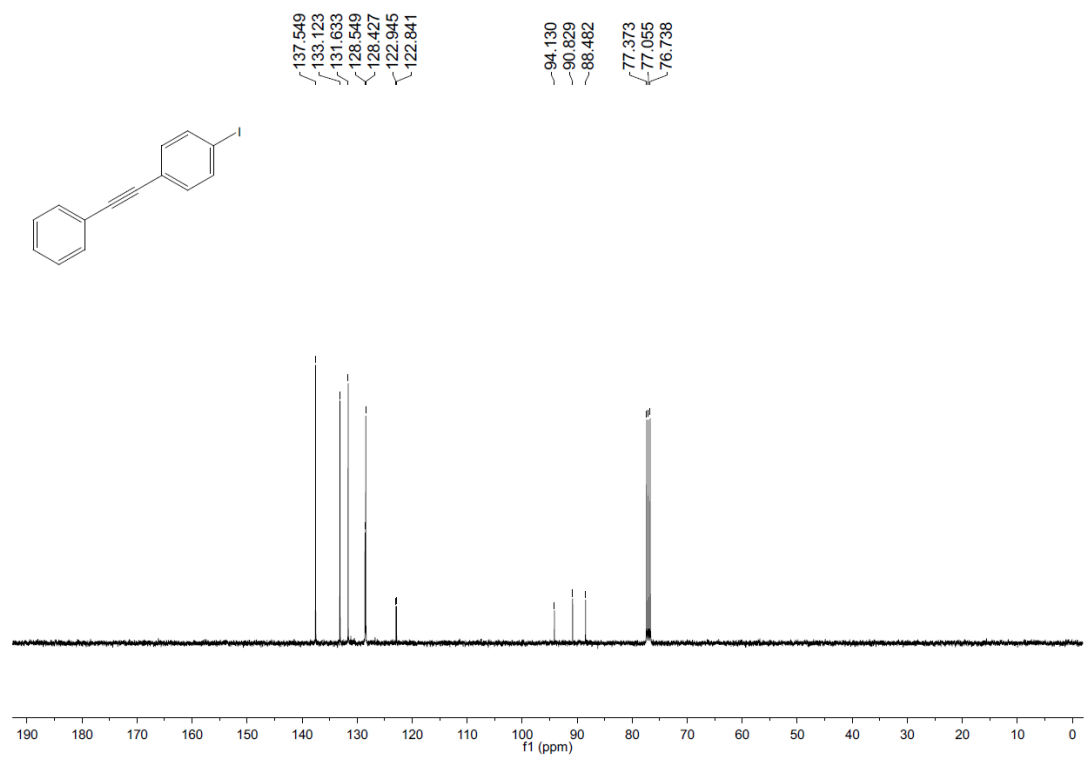

<sup>1</sup>H NMR and <sup>13</sup>C NMR spectra of compounds **3e** (in CDCl<sub>3</sub>)

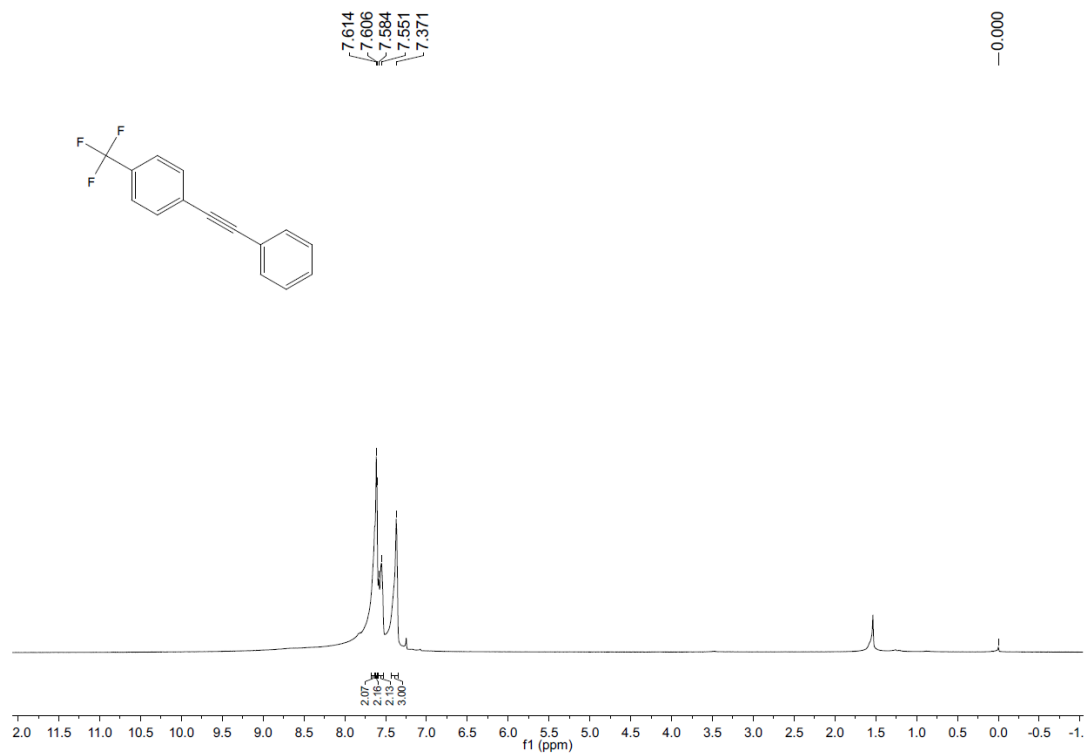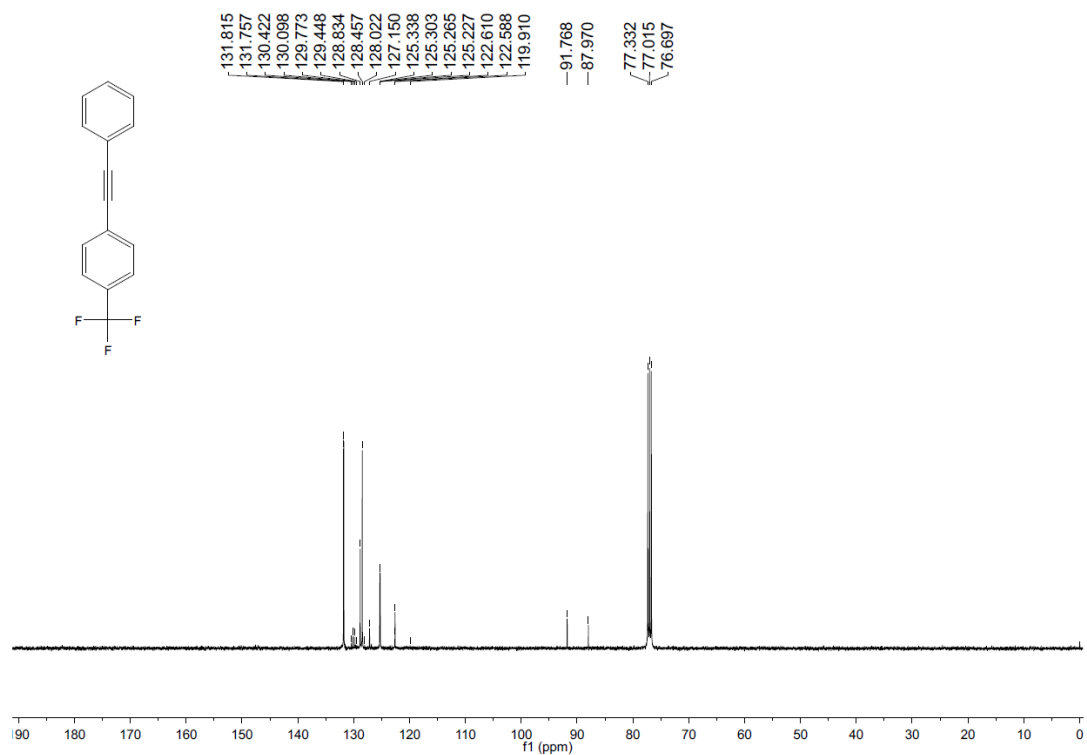

$^1\text{H}$  NMR and  $^{13}\text{C}$  NMR spectra of compounds **3f** (in  $\text{CDCl}_3$ )

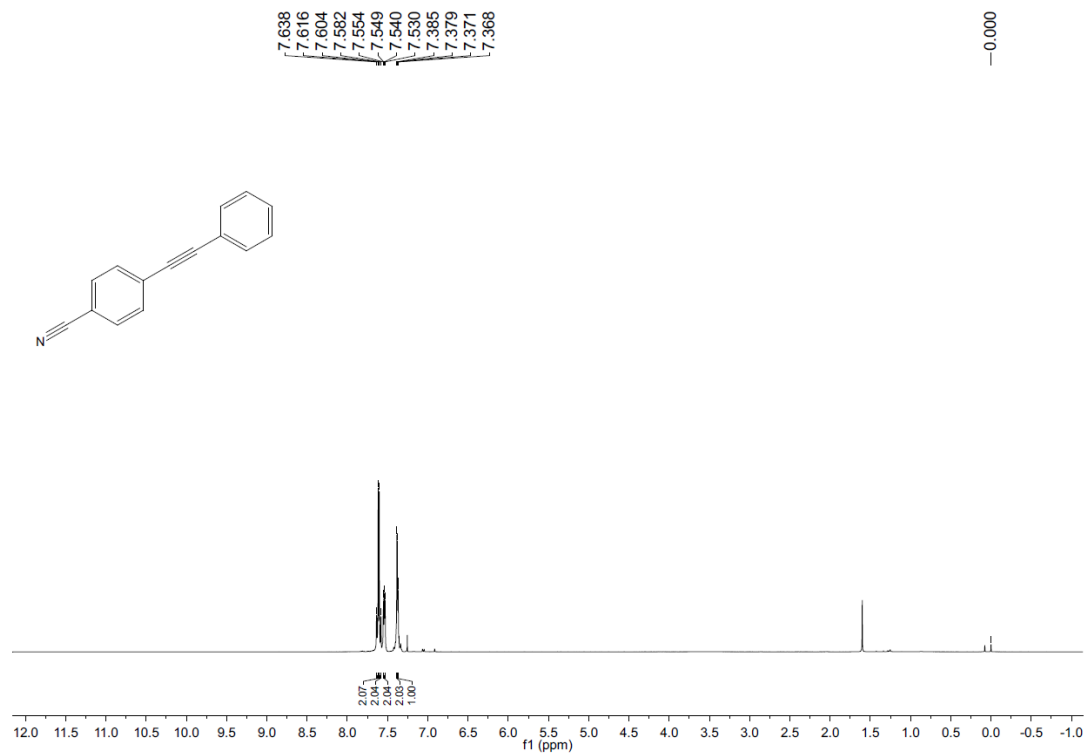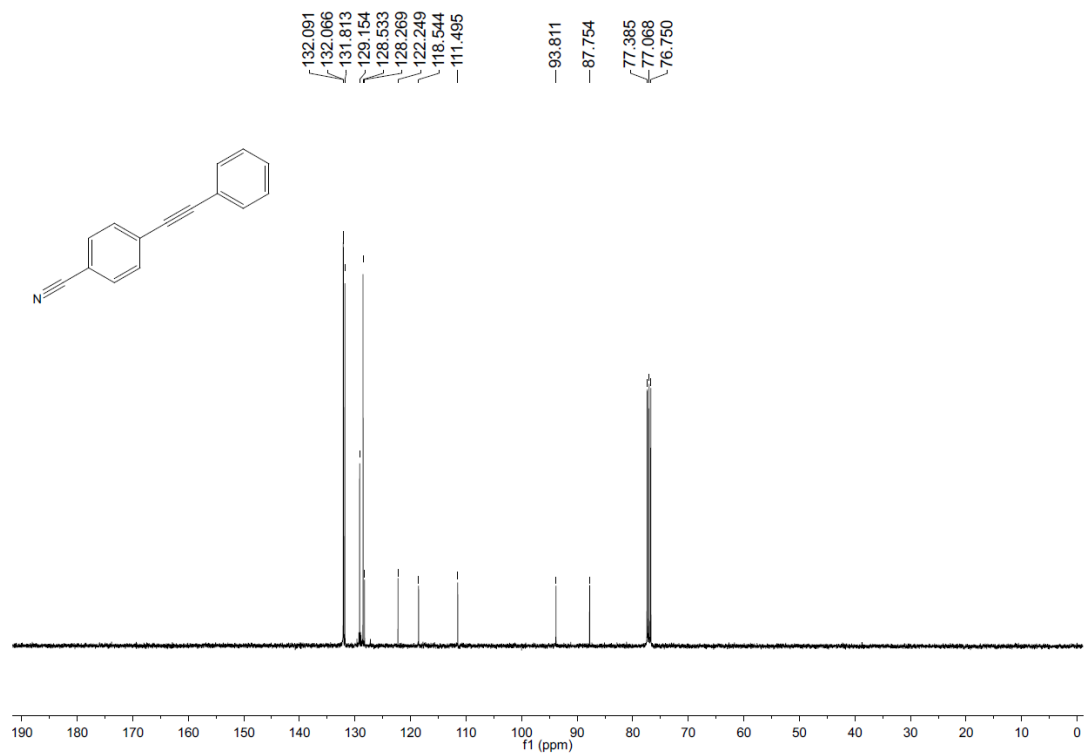

<sup>1</sup>H NMR and <sup>13</sup>C NMR spectra of compounds **3g** (in CDCl<sub>3</sub>)



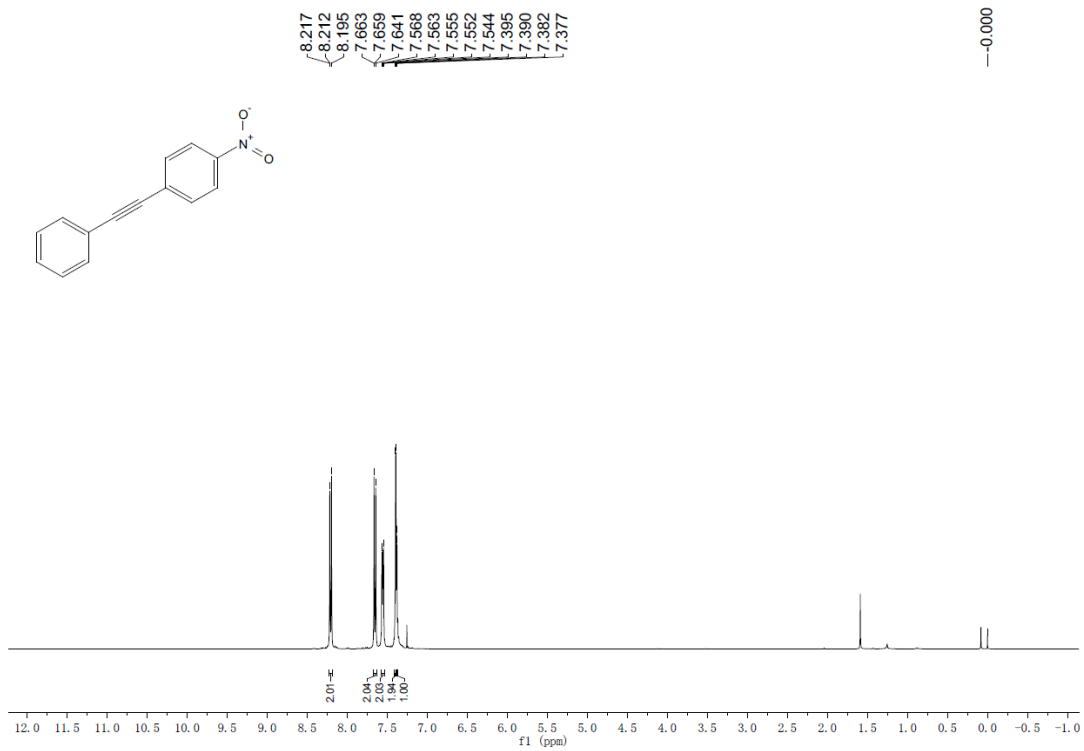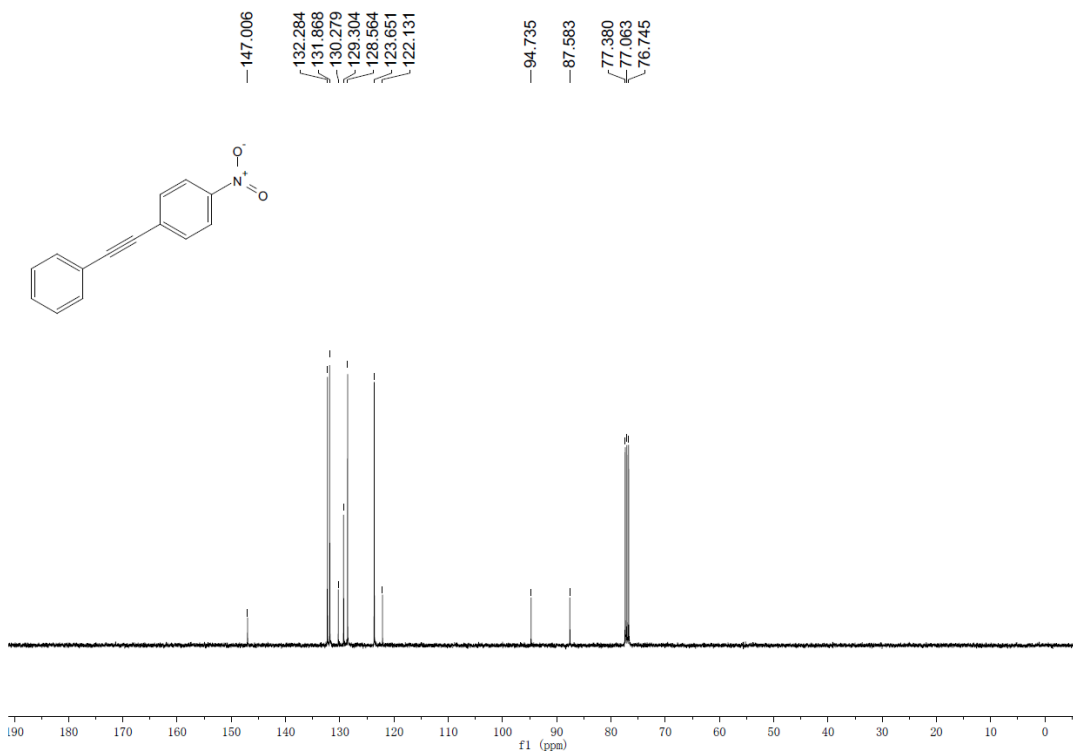

$^1\text{H}$  NMR and  $^{13}\text{C}$  NMR spectra of compounds **3h** (in  $\text{CDCl}_3$ )

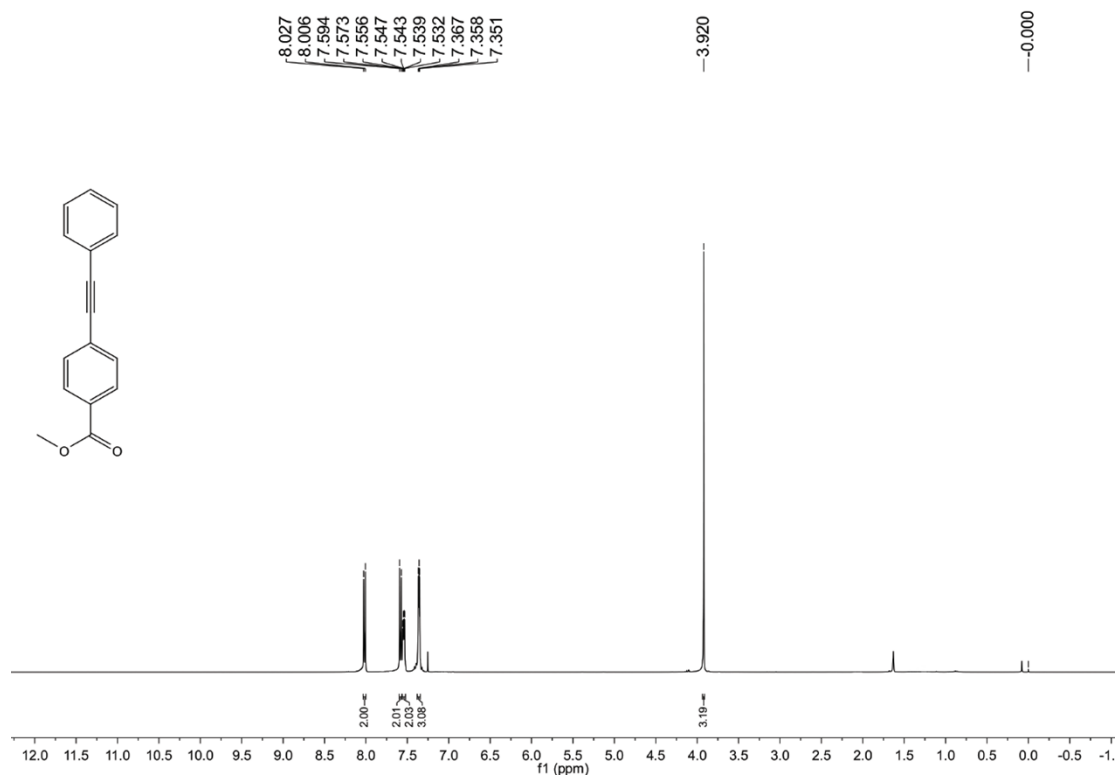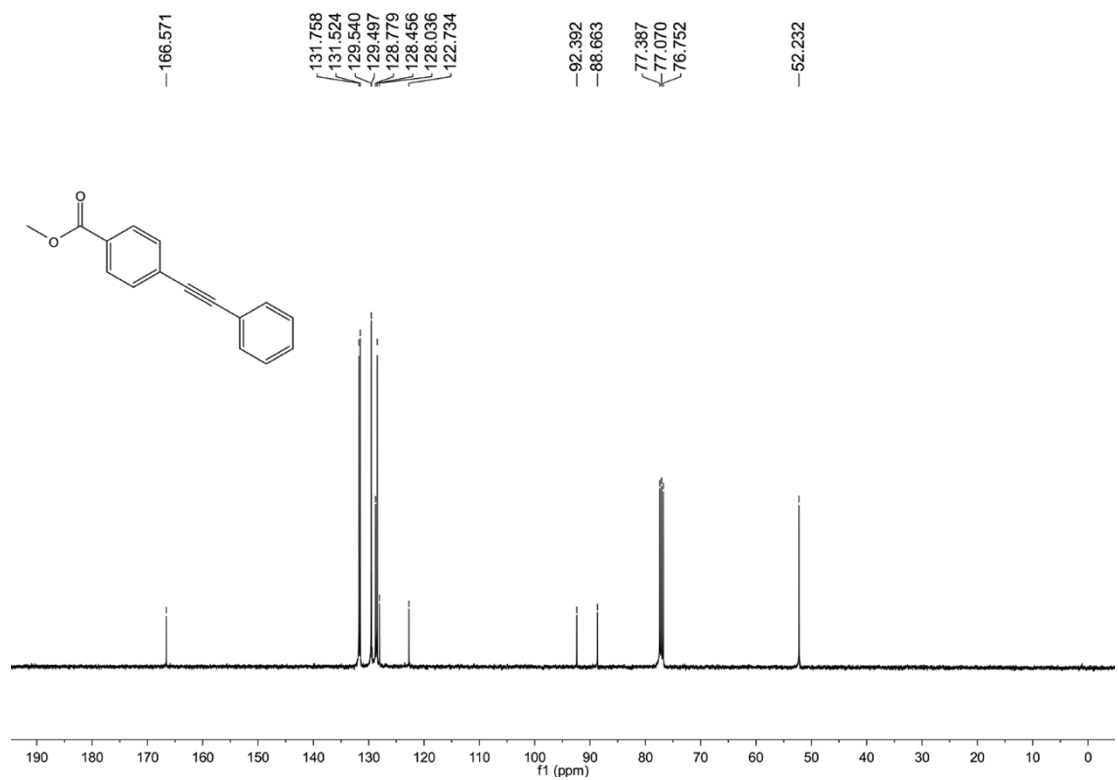

$^1\text{H NMR}$  and  $^{13}\text{C NMR}$  spectra of compounds **3i** (in  $\text{CDCl}_3$ )

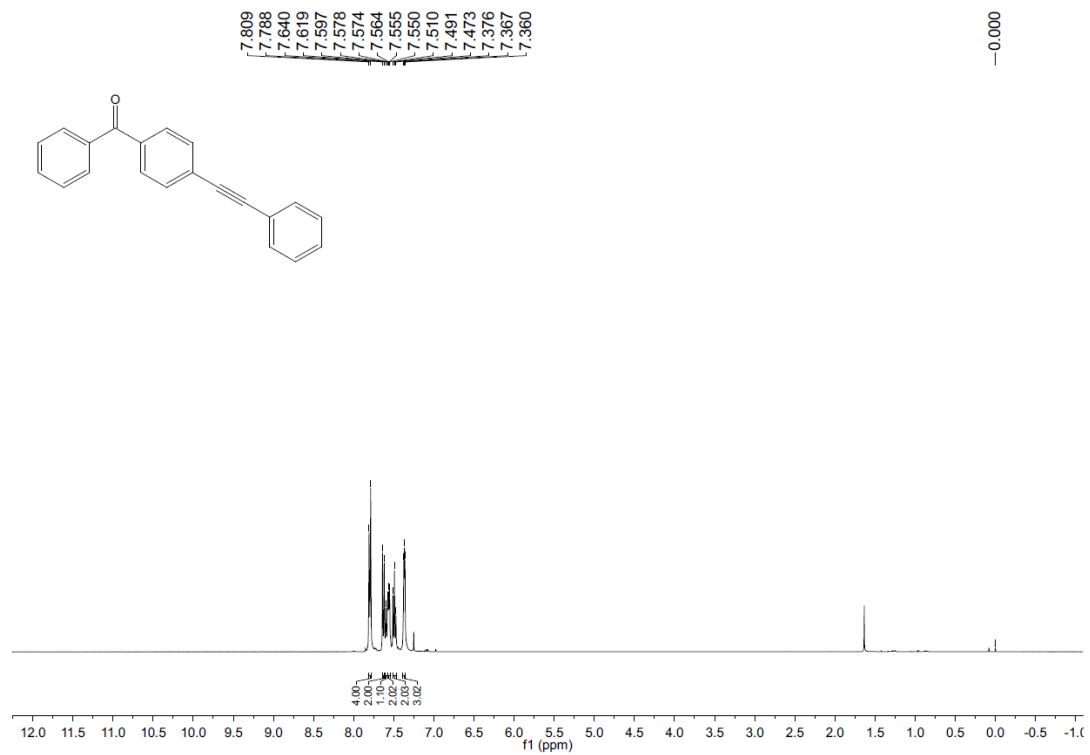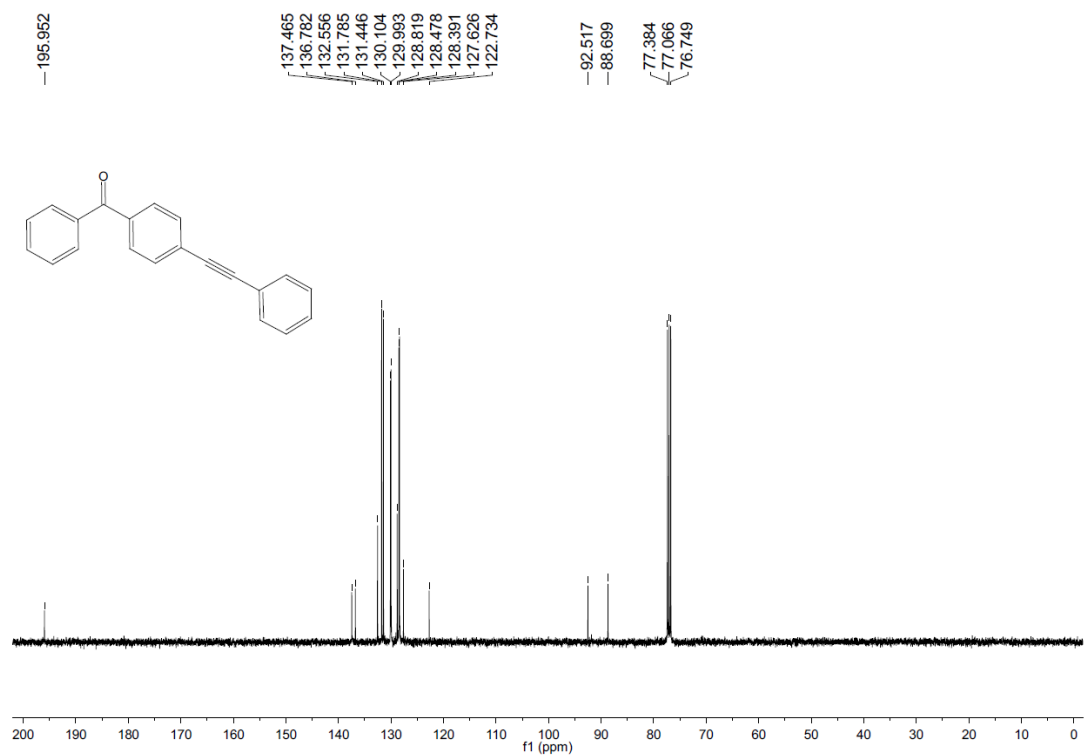

<sup>1</sup>H NMR and <sup>13</sup>C NMR spectra of compounds **3j** (in CDCl<sub>3</sub>)

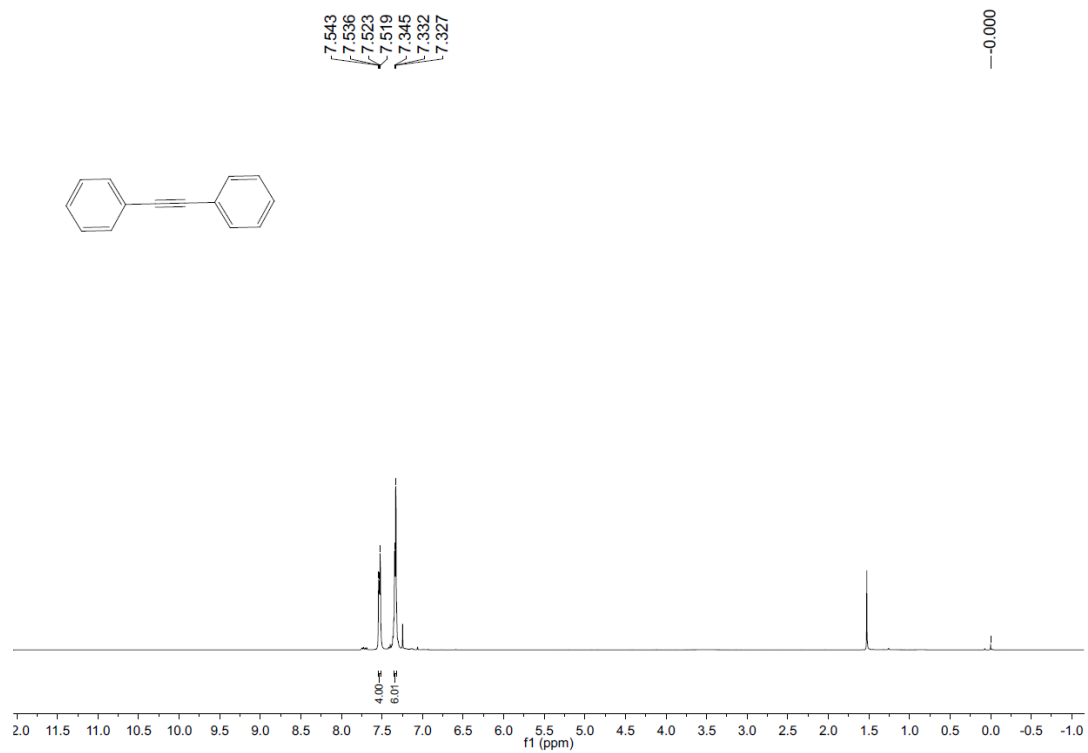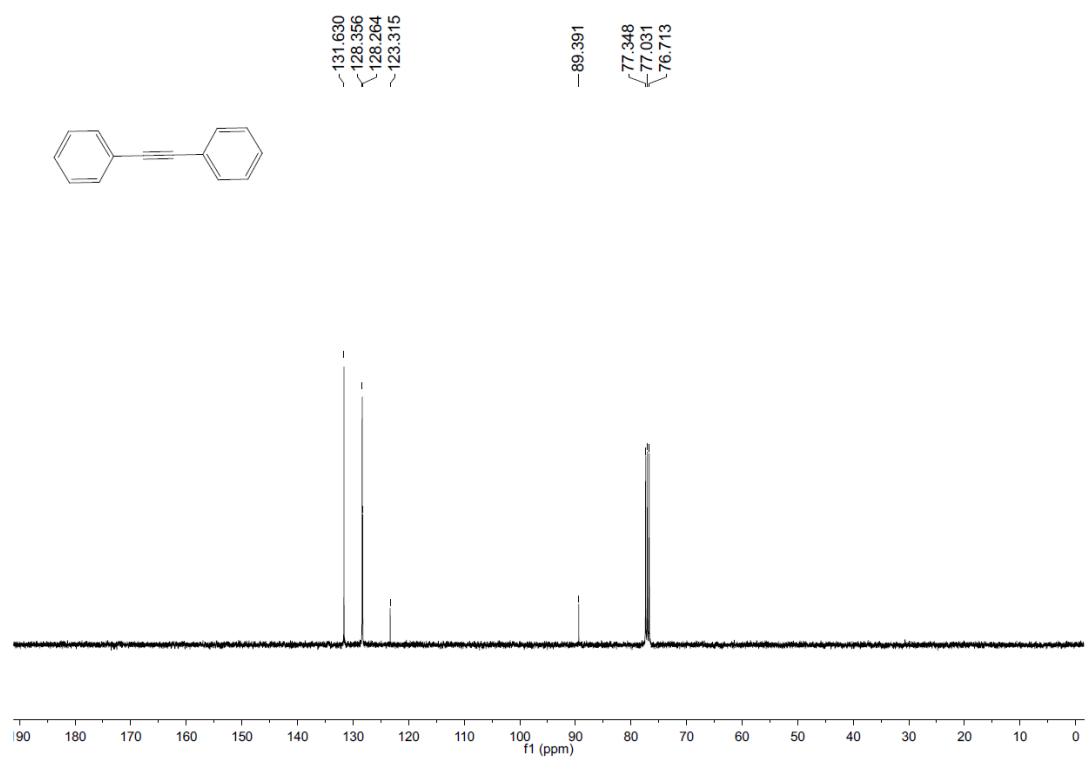

$^1\text{H}$  NMR and  $^{13}\text{C}$  NMR spectra of compounds **3k** (in  $\text{CDCl}_3$ )

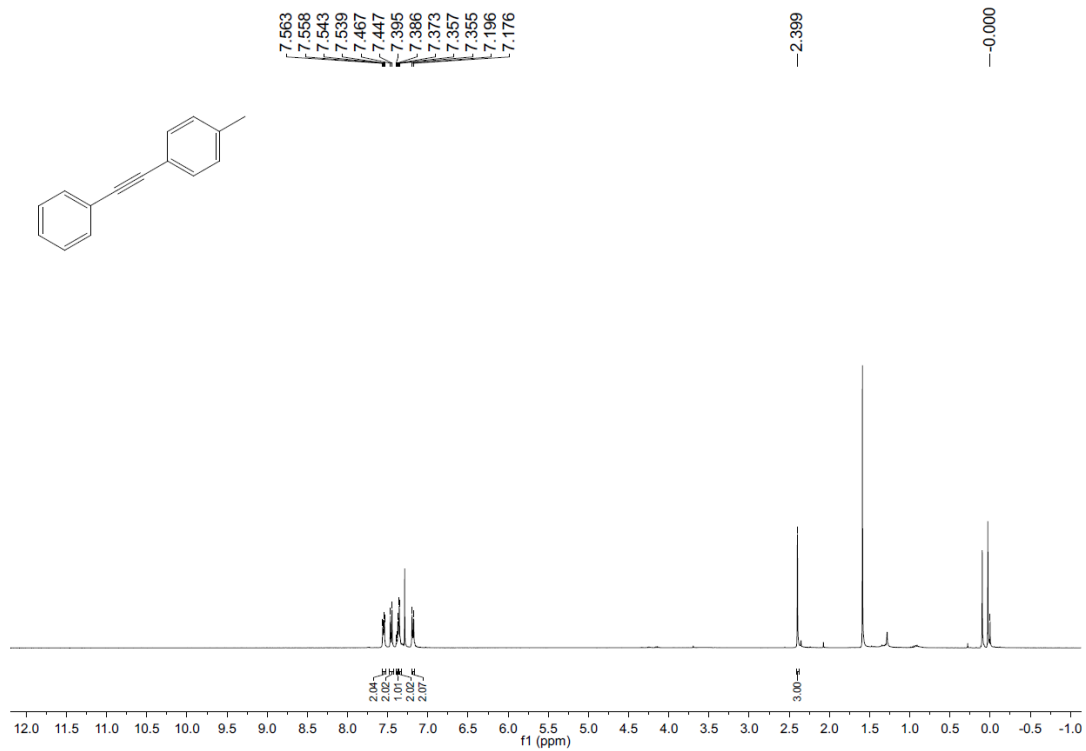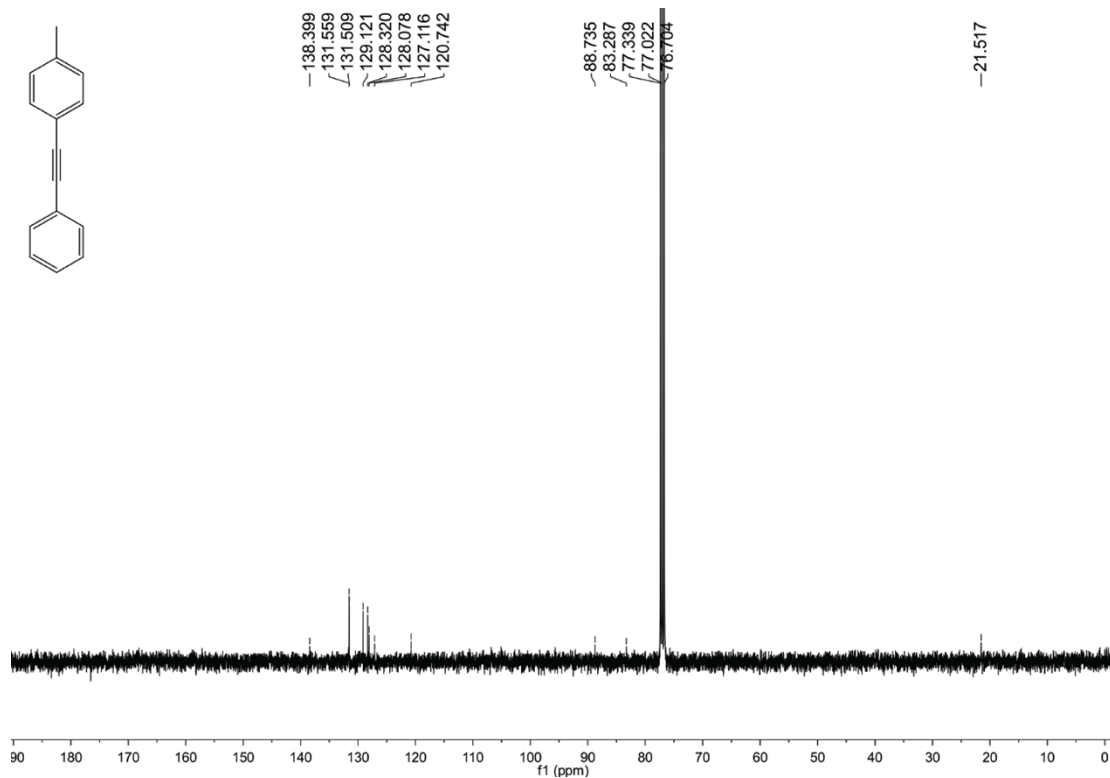

<sup>1</sup>H NMR and <sup>13</sup>C NMR spectra of compounds **31** (in CDCl<sub>3</sub>)

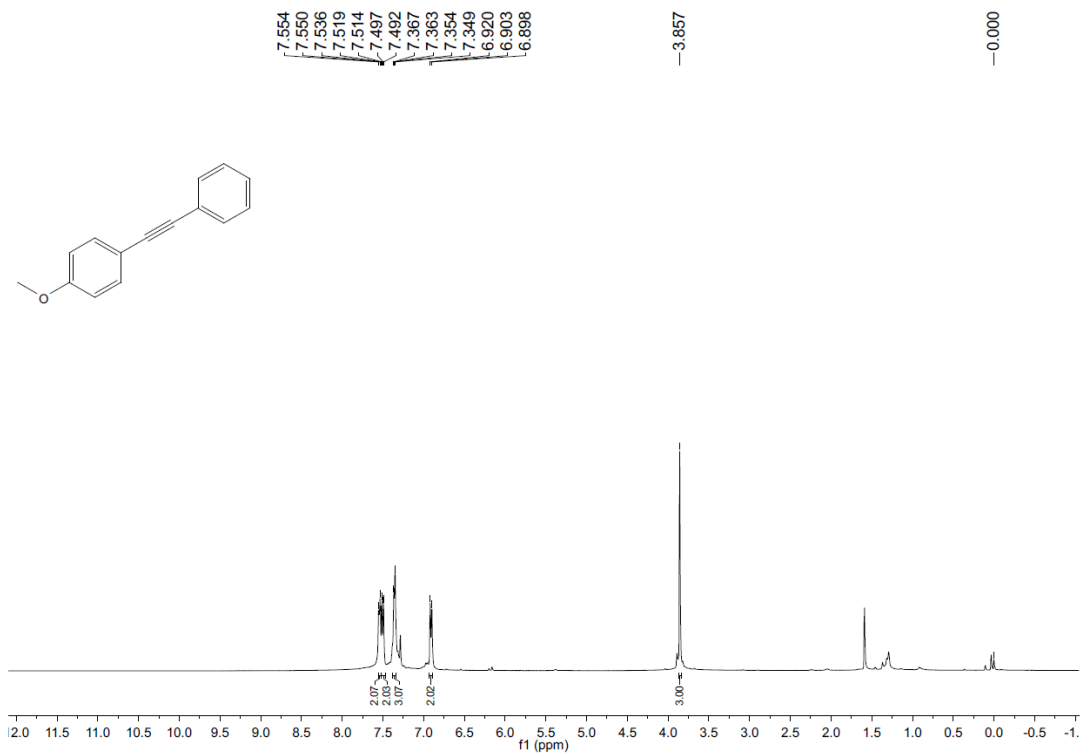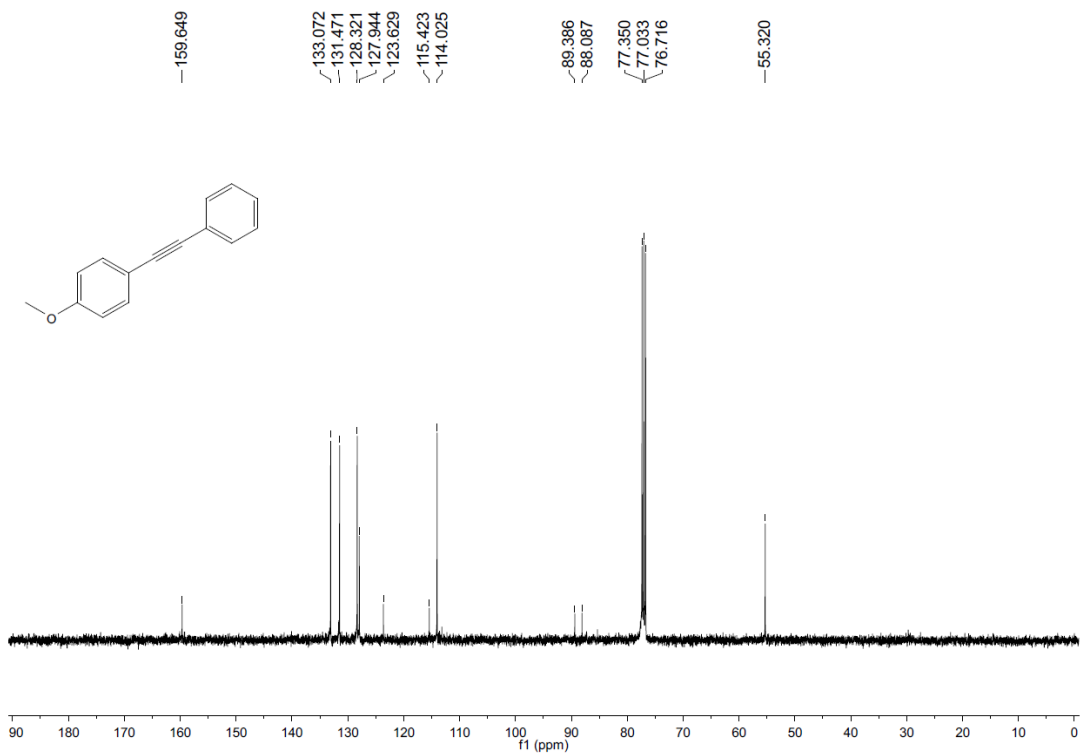

<sup>1</sup>H NMR and <sup>13</sup>C NMR spectra of compounds **3m** (in CDCl<sub>3</sub>)

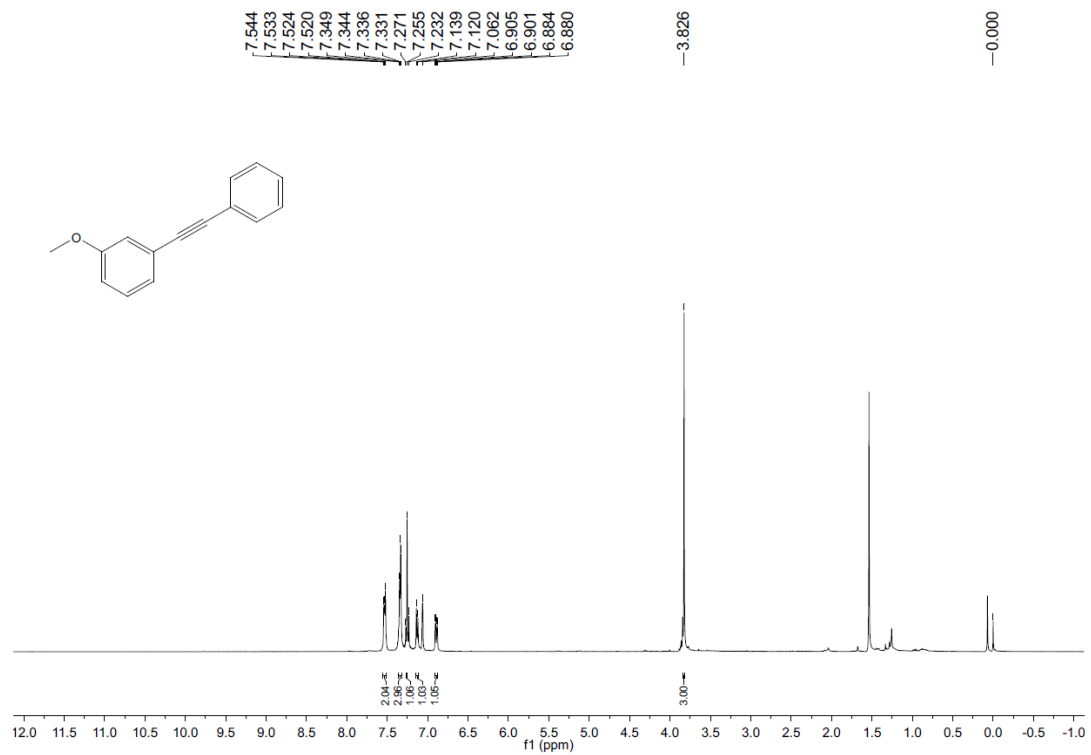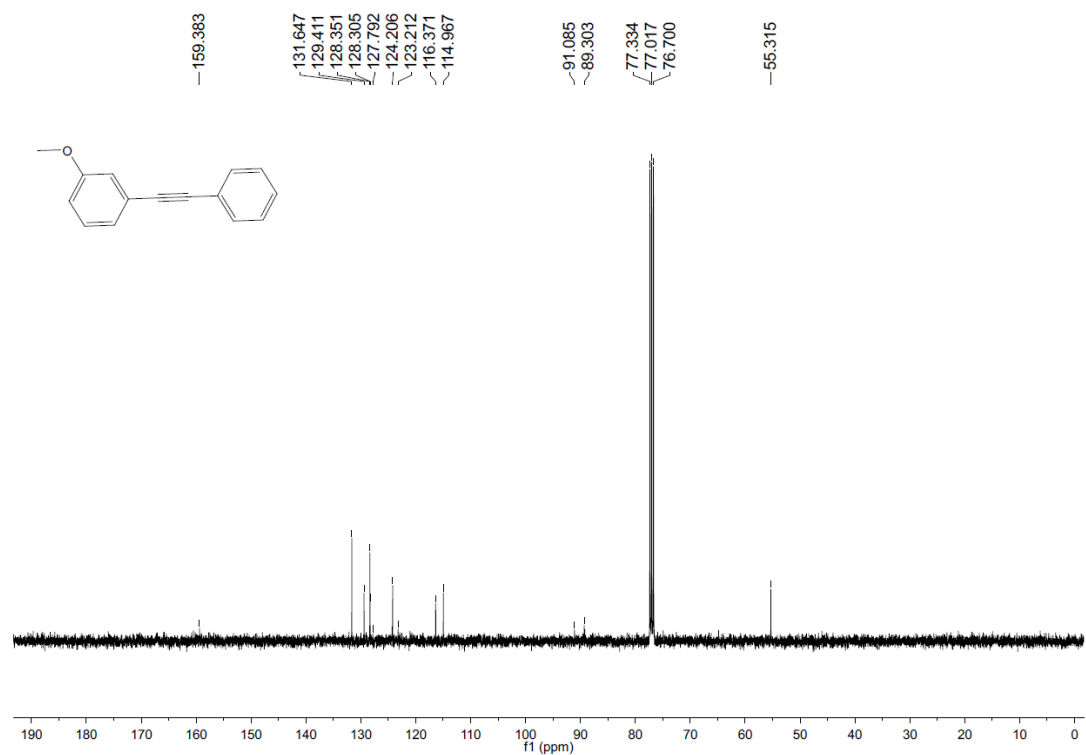

<sup>1</sup>H NMR and <sup>13</sup>C NMR spectra of compounds **3n** (in CDCl<sub>3</sub>)

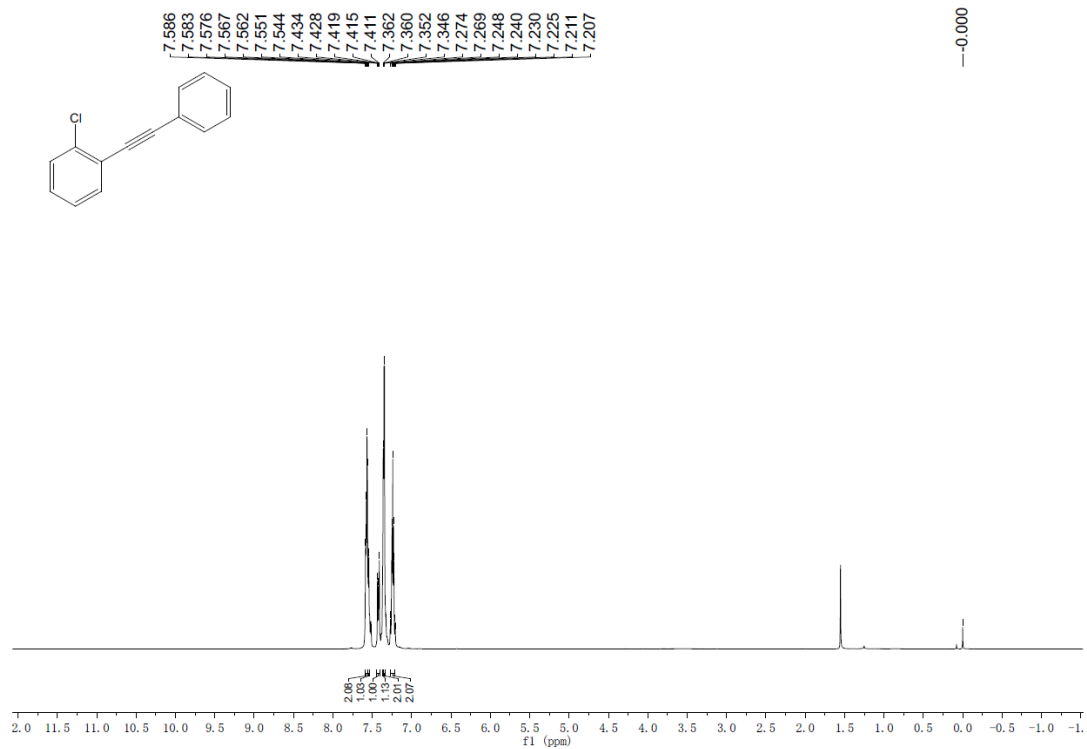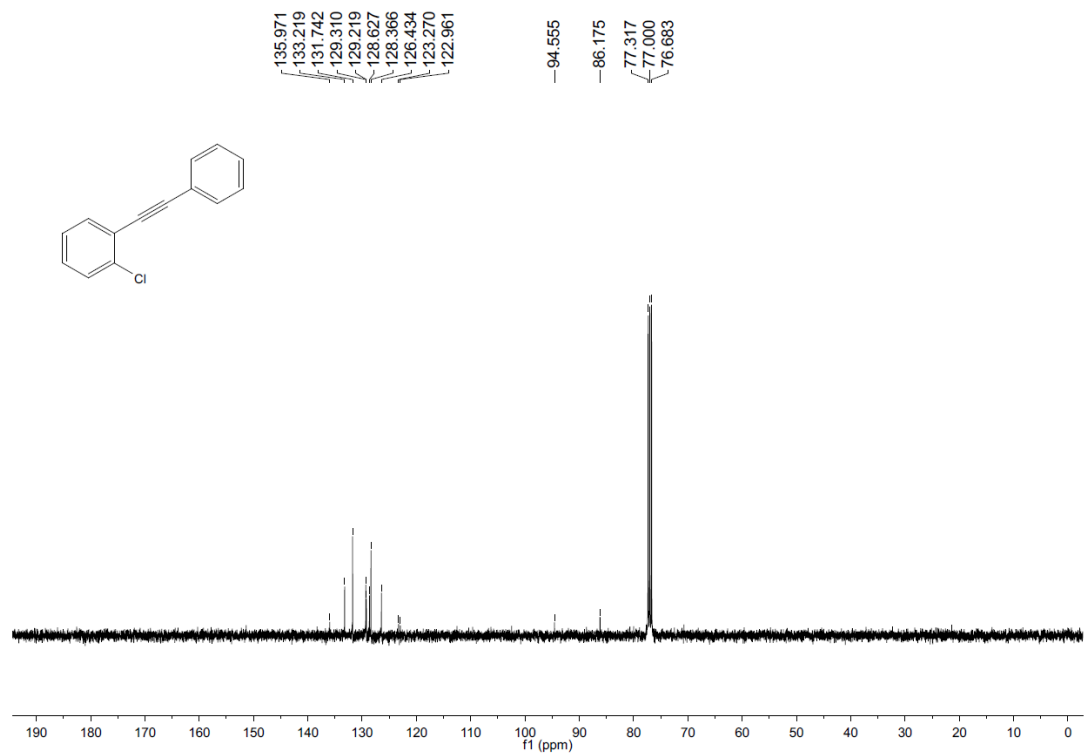

$^1\text{H}$  NMR and  $^{13}\text{C}$  NMR spectra of compounds **3o** (in  $\text{CDCl}_3$ )



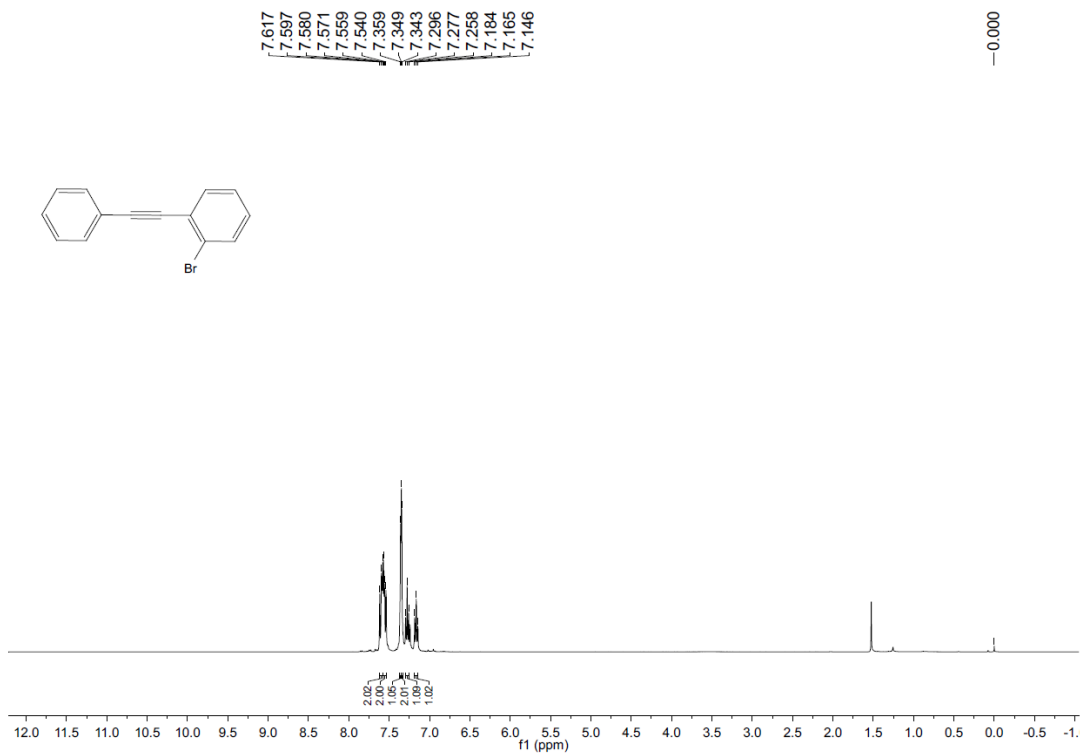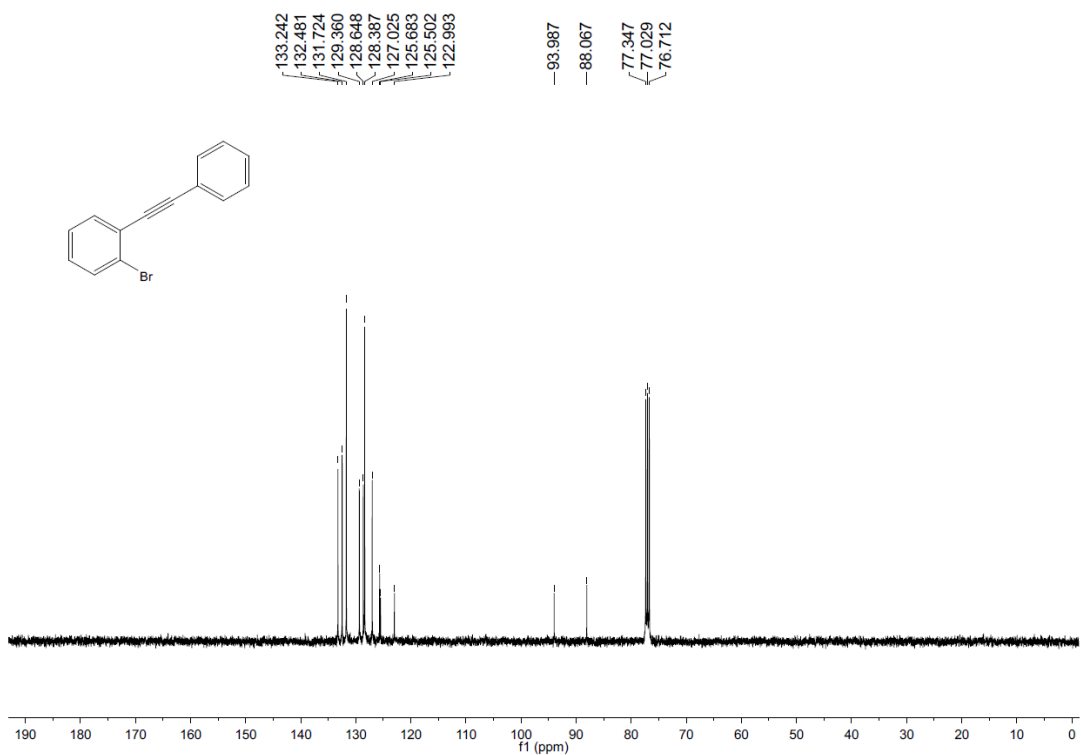

<sup>1</sup>H NMR and <sup>13</sup>C NMR spectra of compounds **3p** (in CDCl<sub>3</sub>)

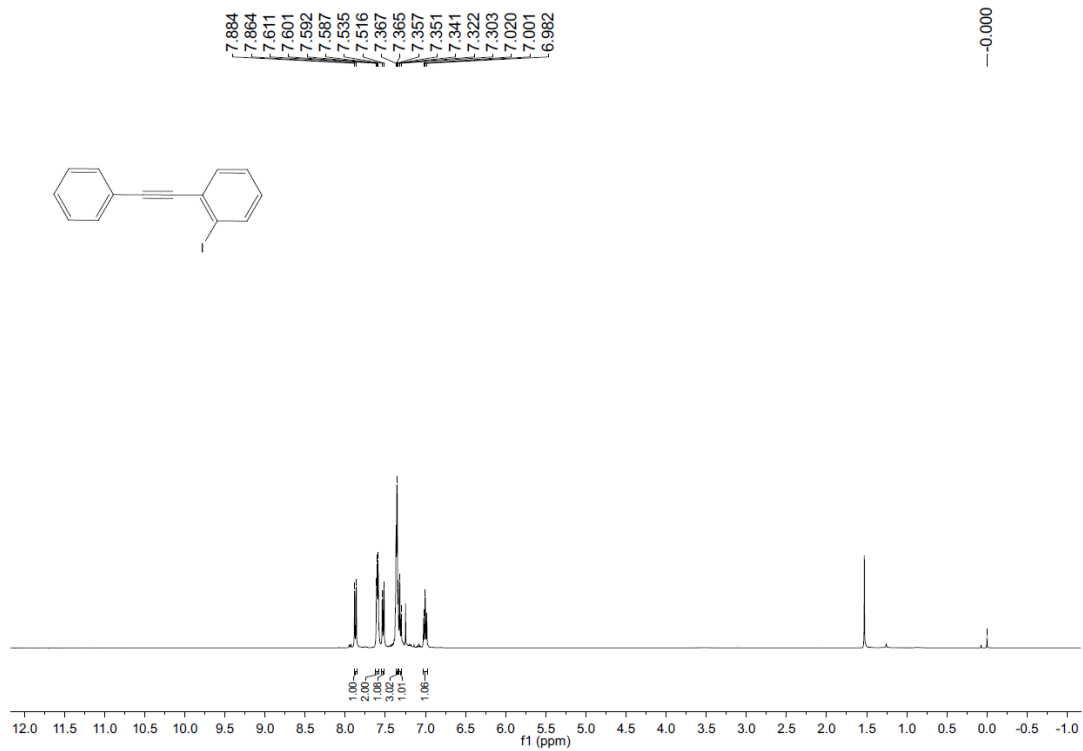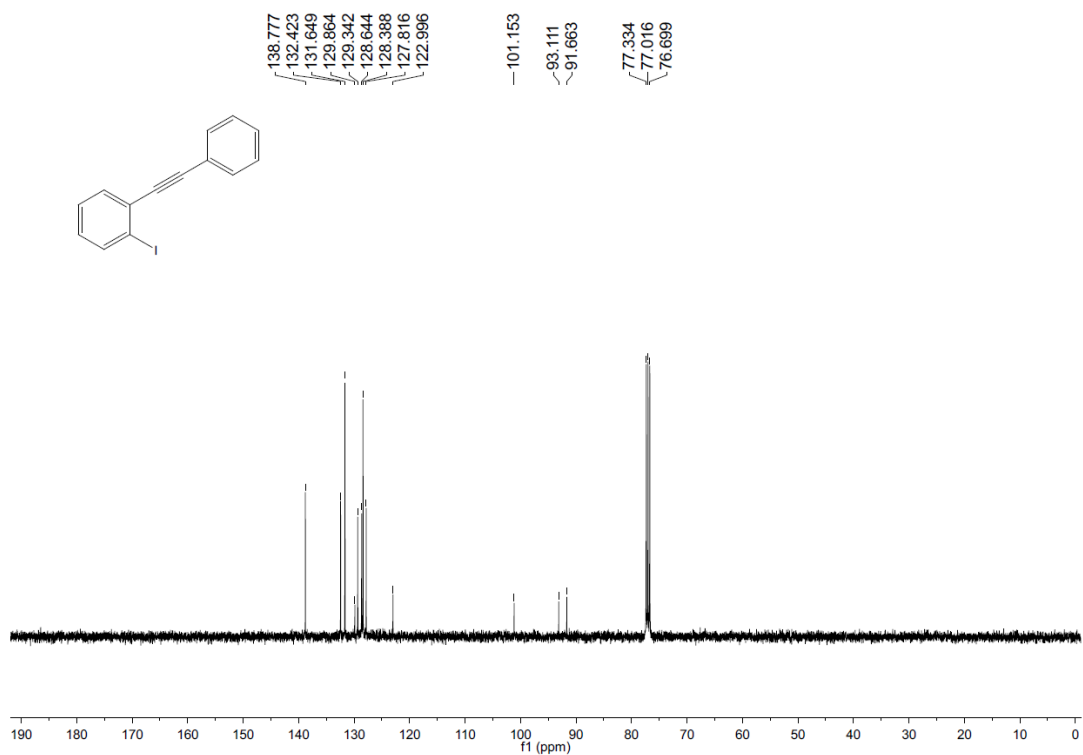

$^1\text{H}$  NMR and  $^{13}\text{C}$  NMR spectra of compounds **3q** (in  $\text{CDCl}_3$ )

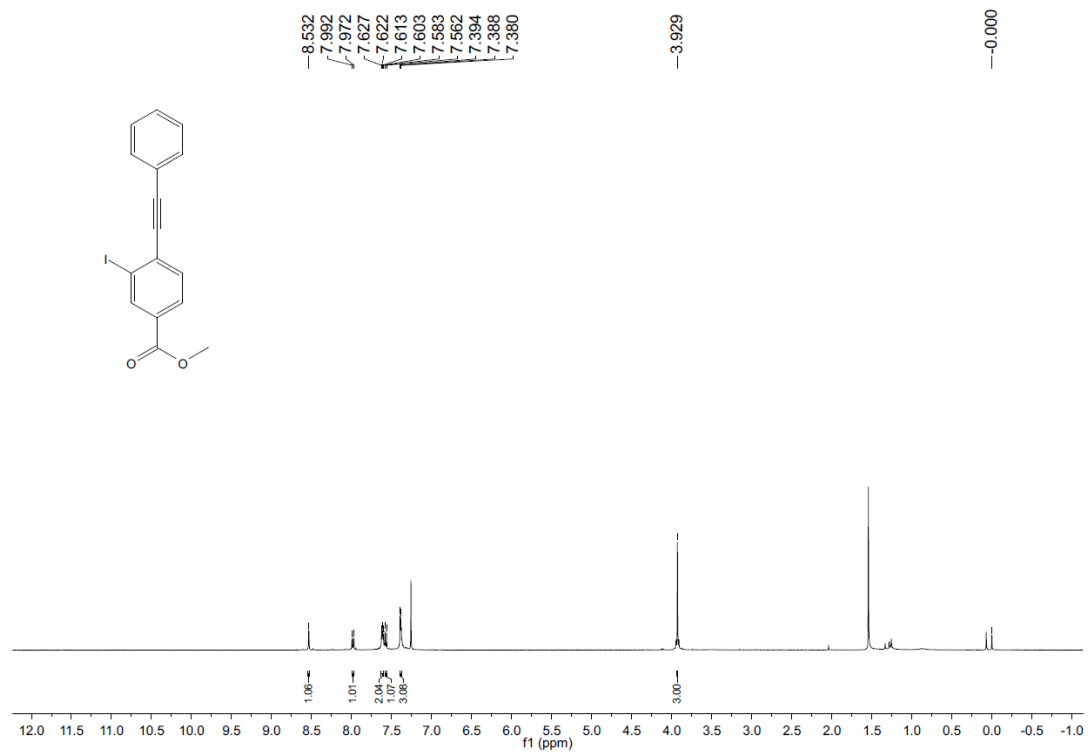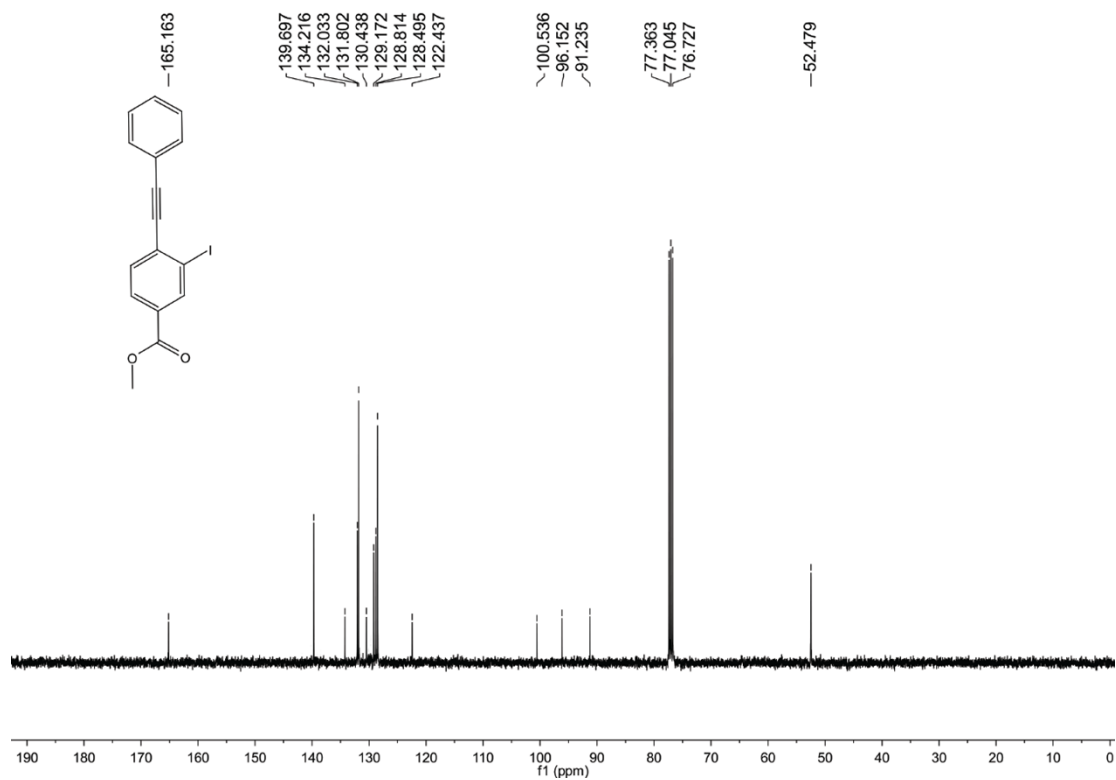

<sup>1</sup>H NMR and <sup>13</sup>C NMR spectra of compounds **3r** (in CDCl<sub>3</sub>)

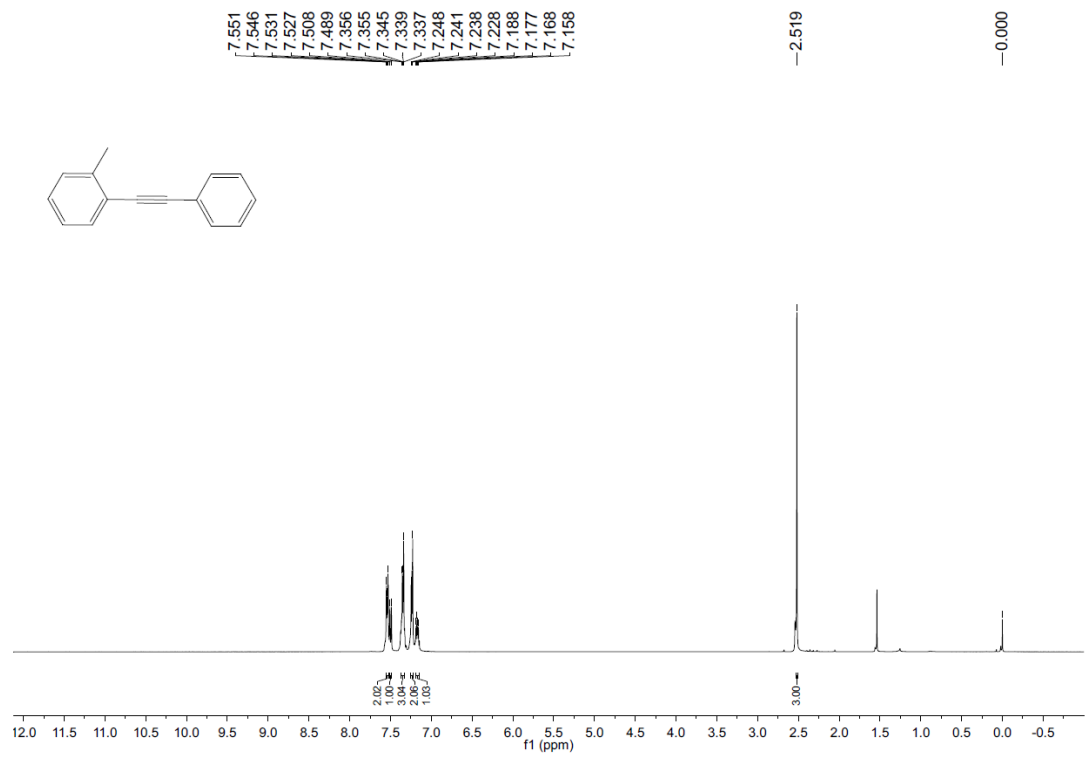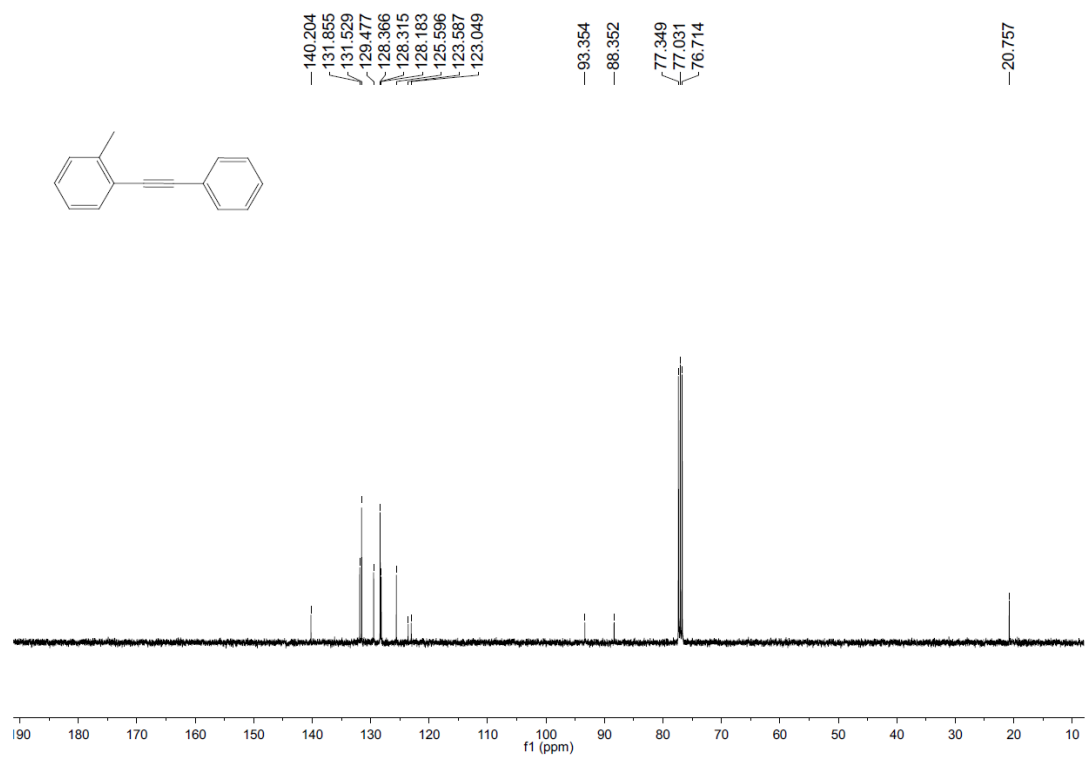

<sup>1</sup>H NMR and <sup>13</sup>C NMR spectra of compounds **3s** (in CDCl<sub>3</sub>)

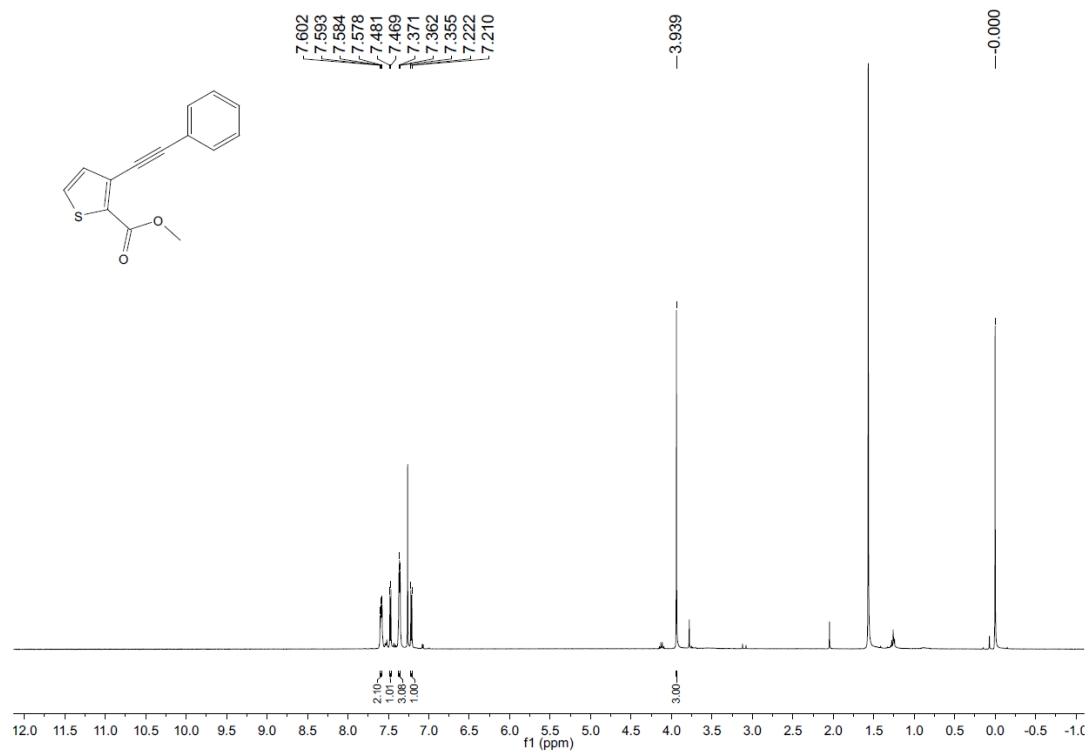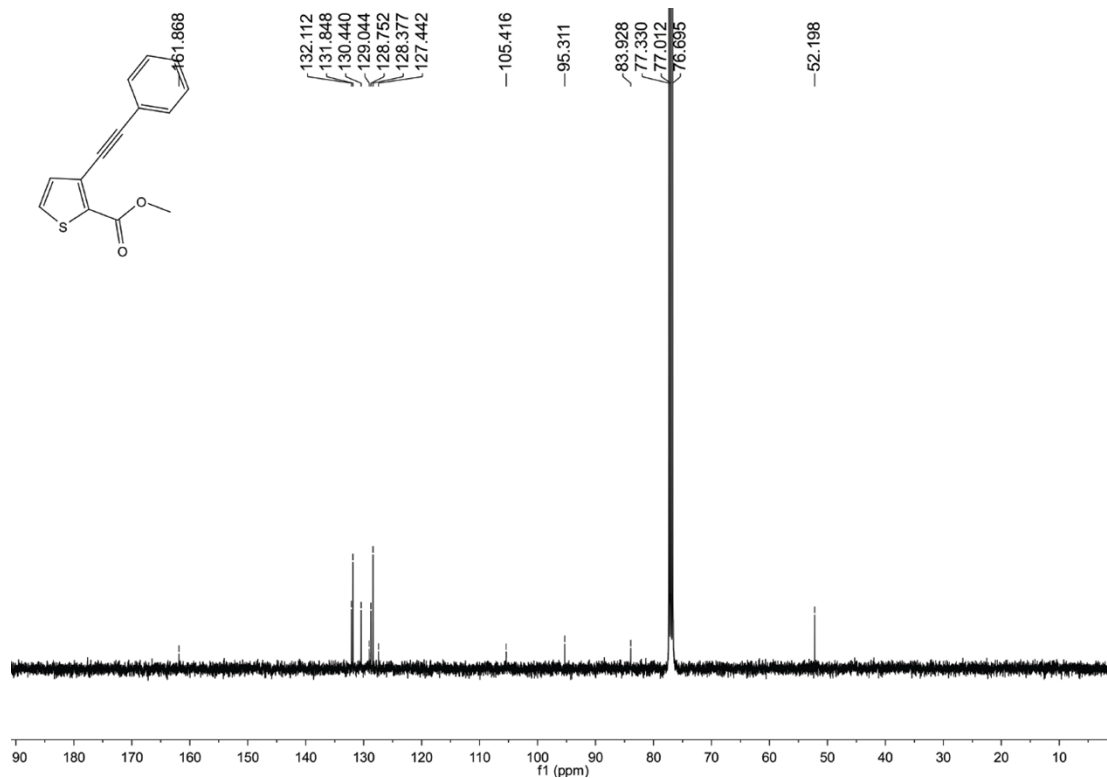

<sup>1</sup>H NMR and <sup>13</sup>C NMR spectra of compounds **3t** (in CDCl<sub>3</sub>)

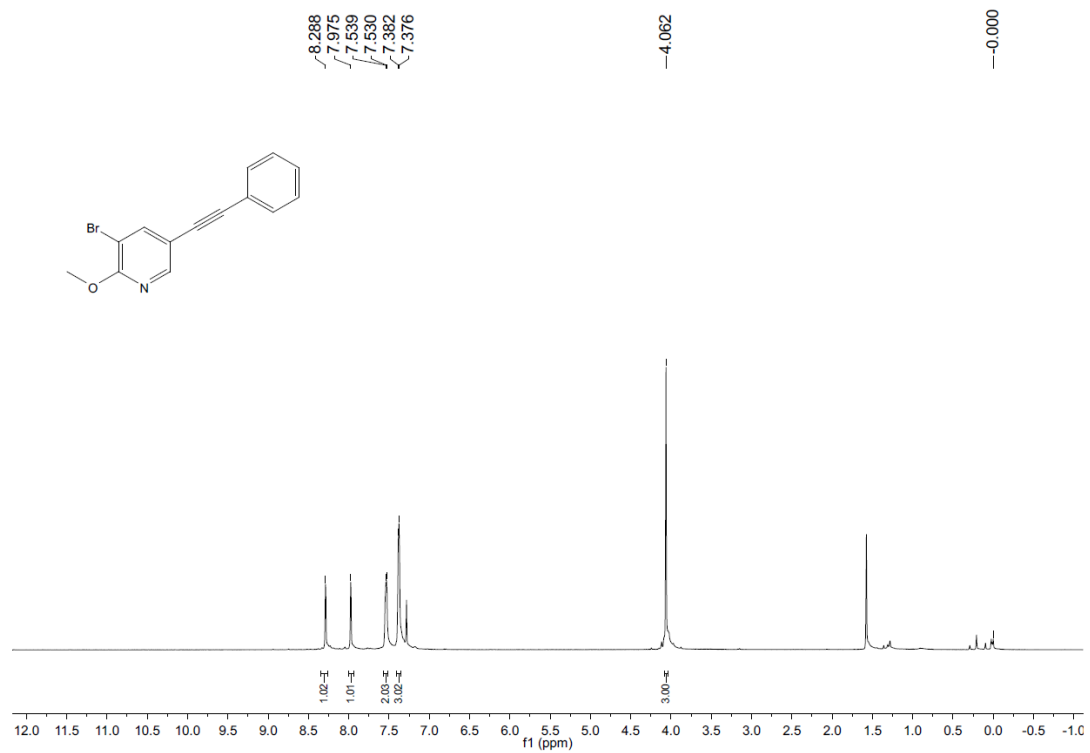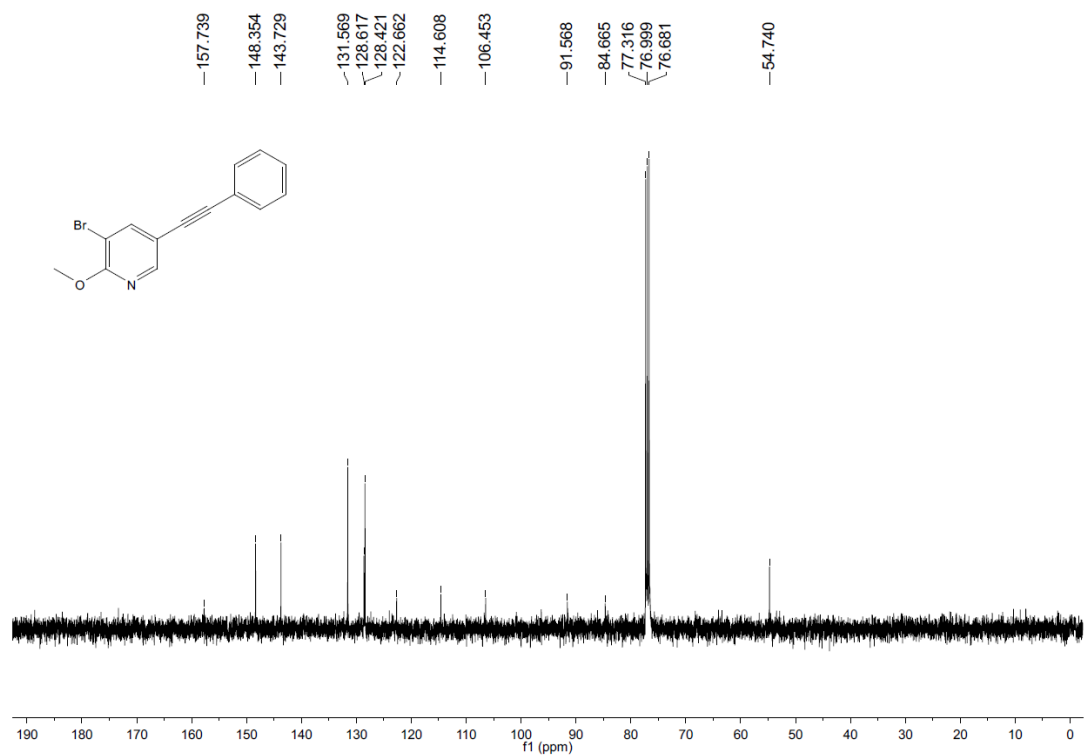

<sup>1</sup>H NMR and <sup>13</sup>C NMR spectra of compounds **3u** (in CDCl<sub>3</sub>)

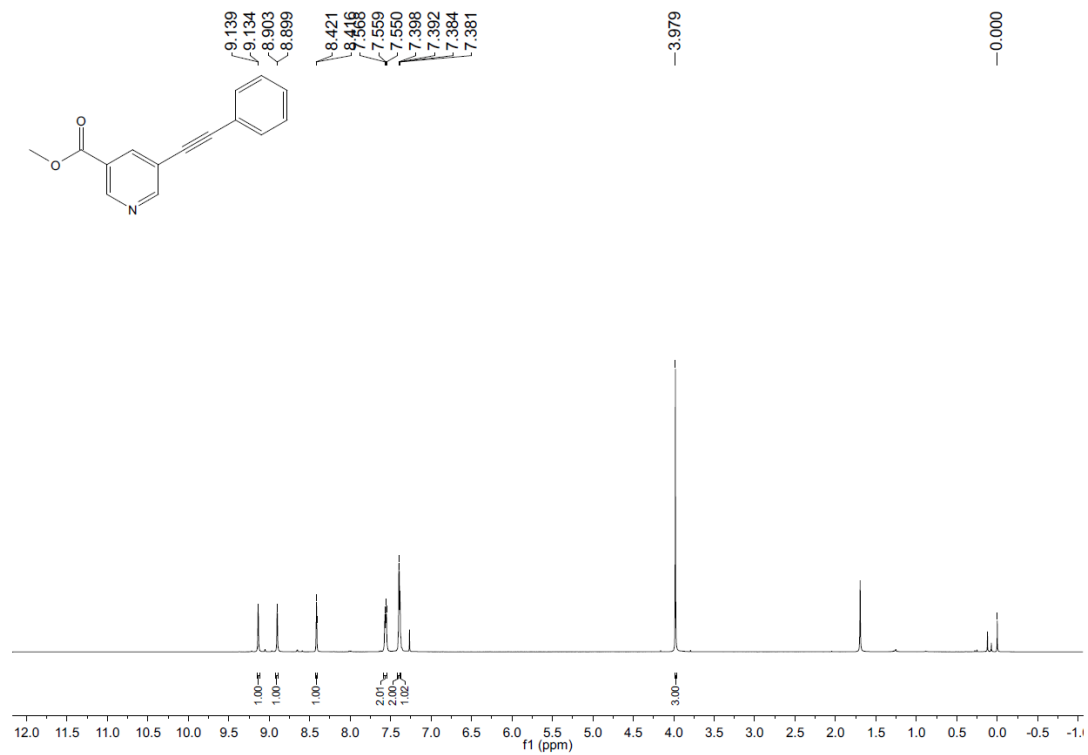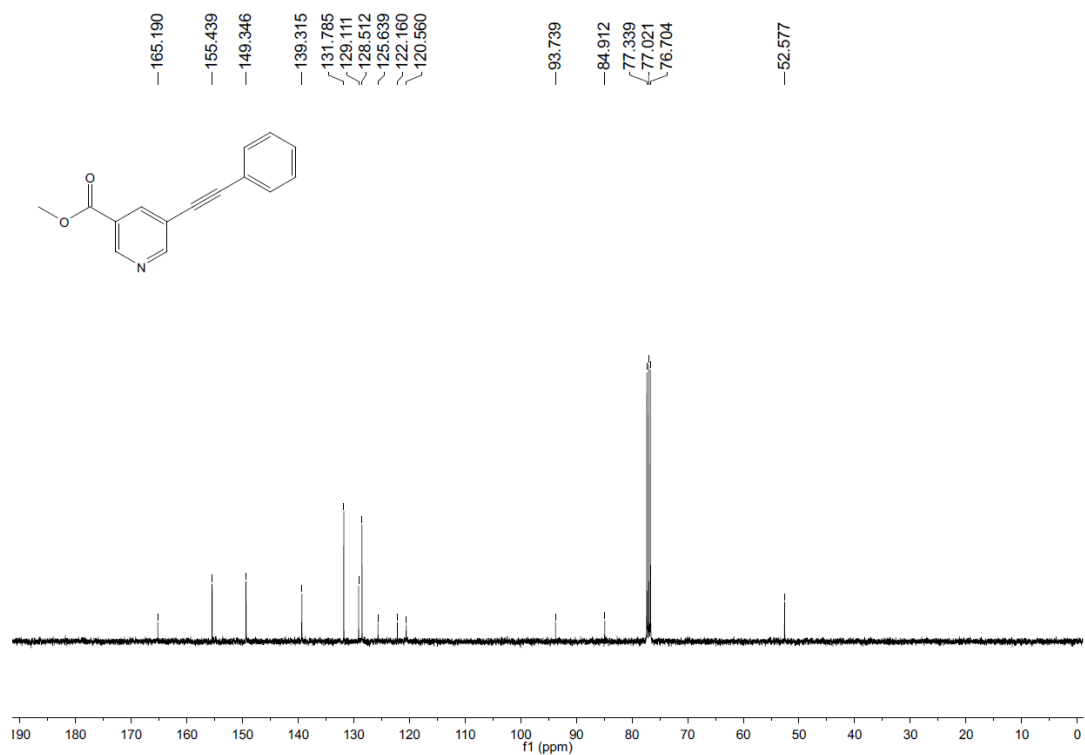

<sup>1</sup>H NMR and <sup>13</sup>C NMR spectra of compounds **3v** (in CDCl<sub>3</sub>)

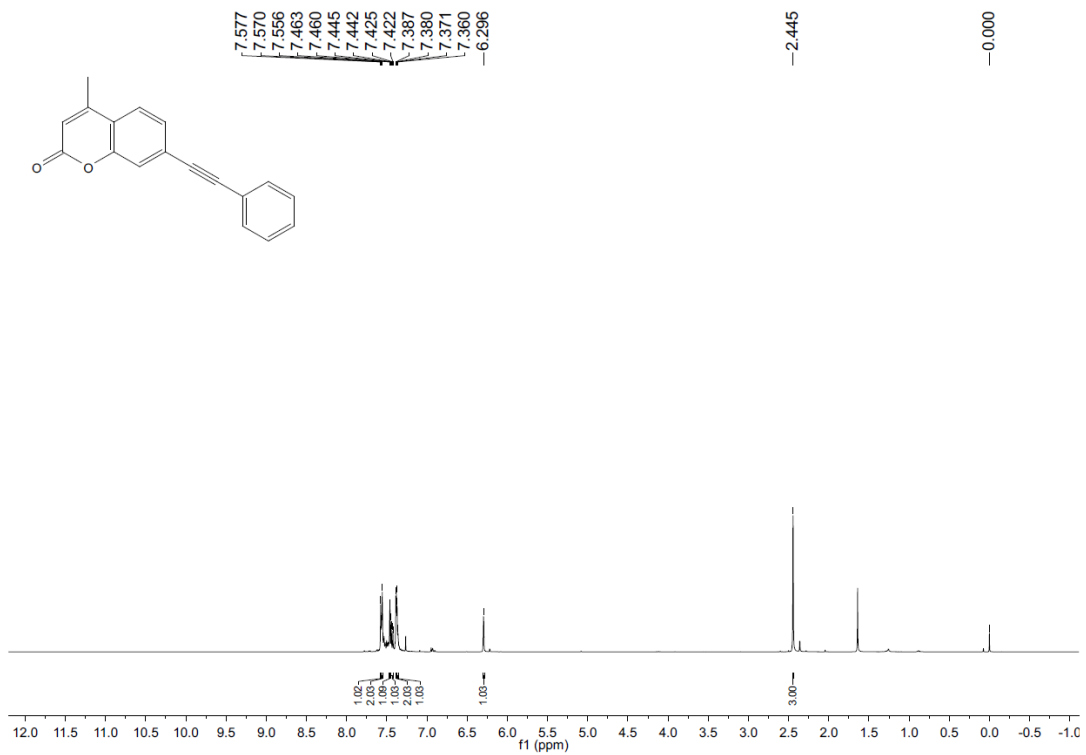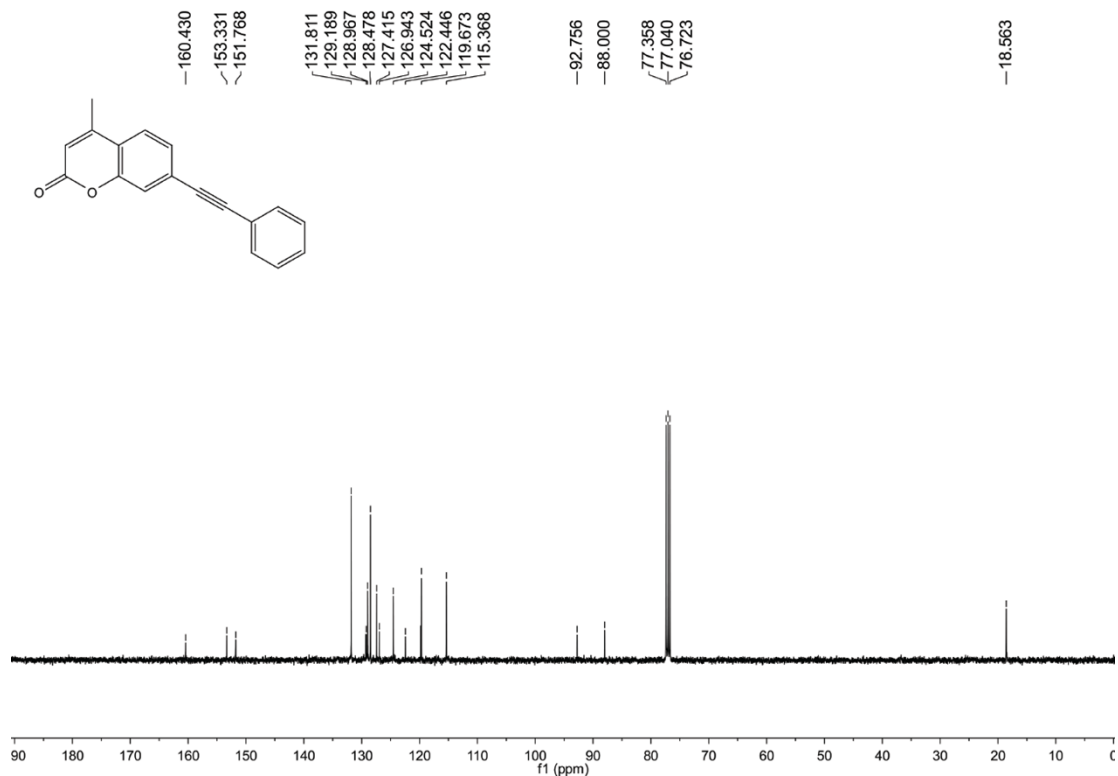

$^1\text{H}$  NMR and  $^{13}\text{C}$  NMR spectra of compounds **3w** (in  $\text{CDCl}_3$ )



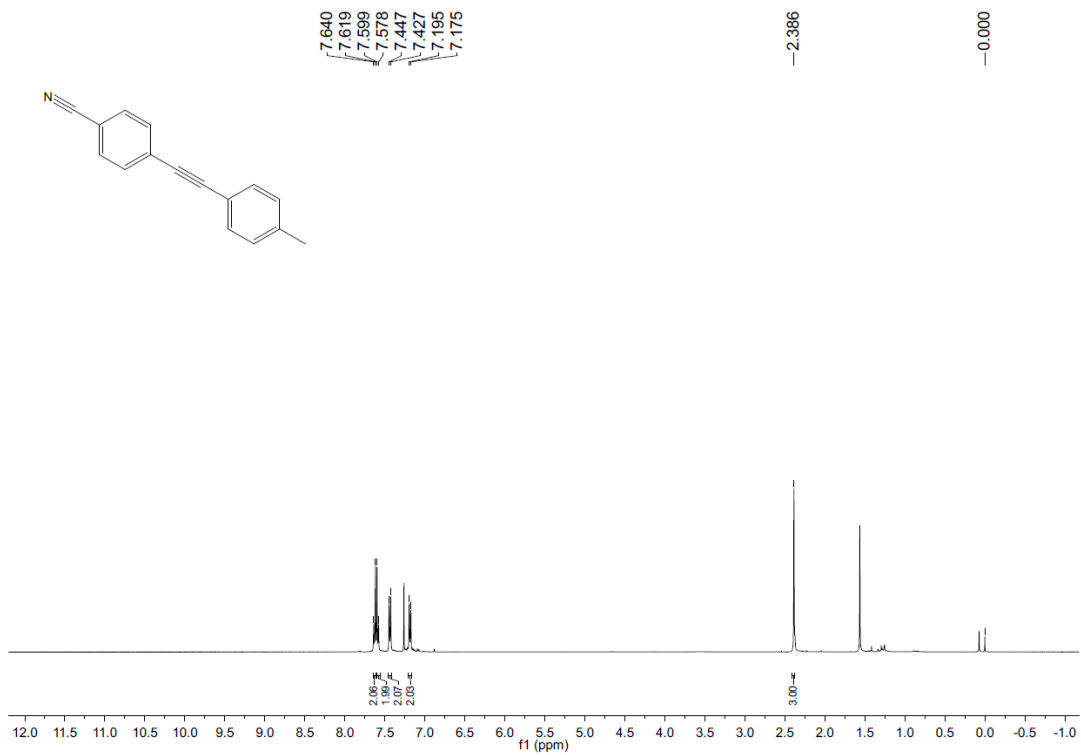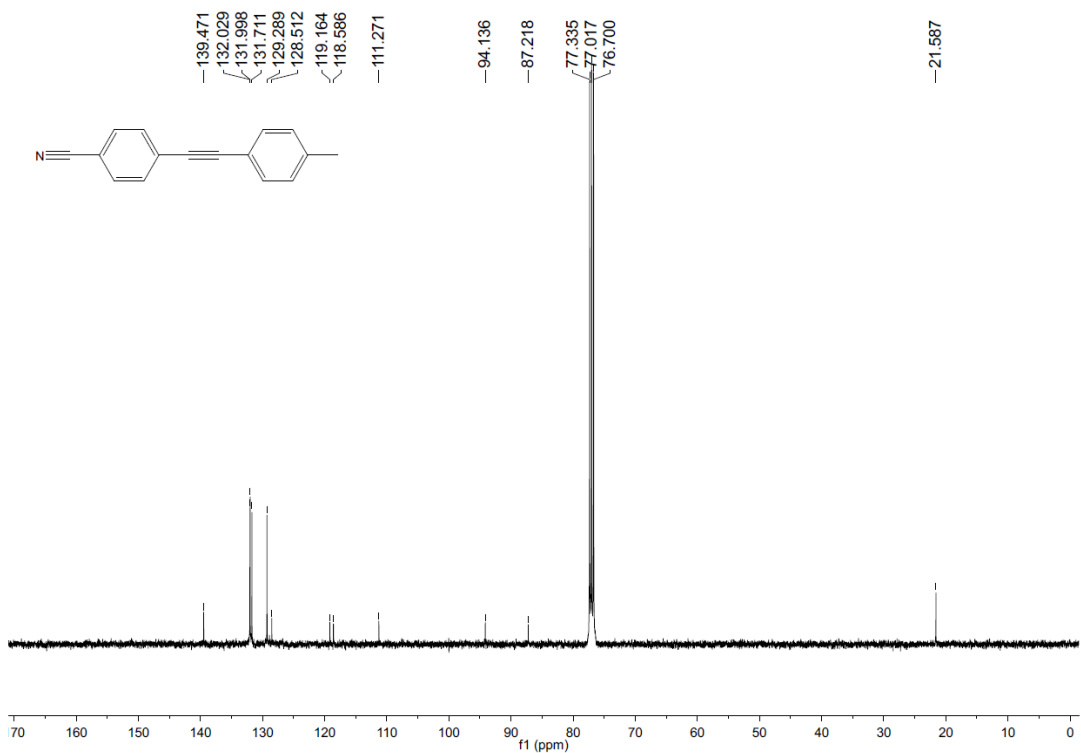

<sup>1</sup>H NMR and <sup>13</sup>C NMR spectra of compounds **3x** (in CDCl<sub>3</sub>)

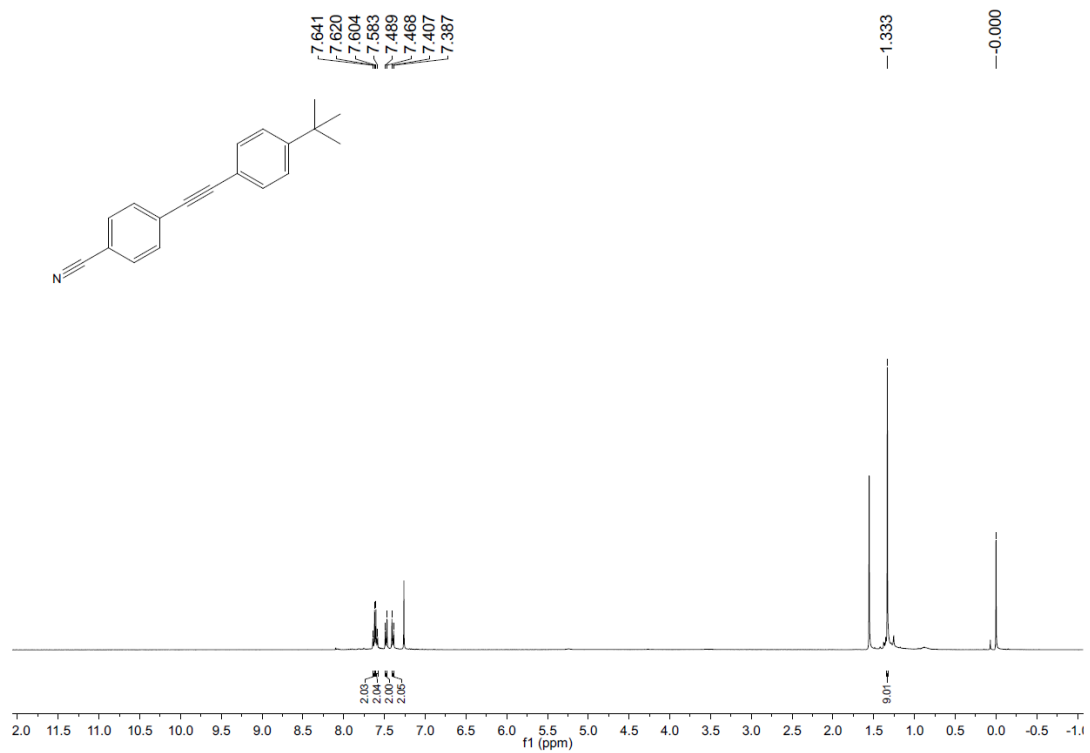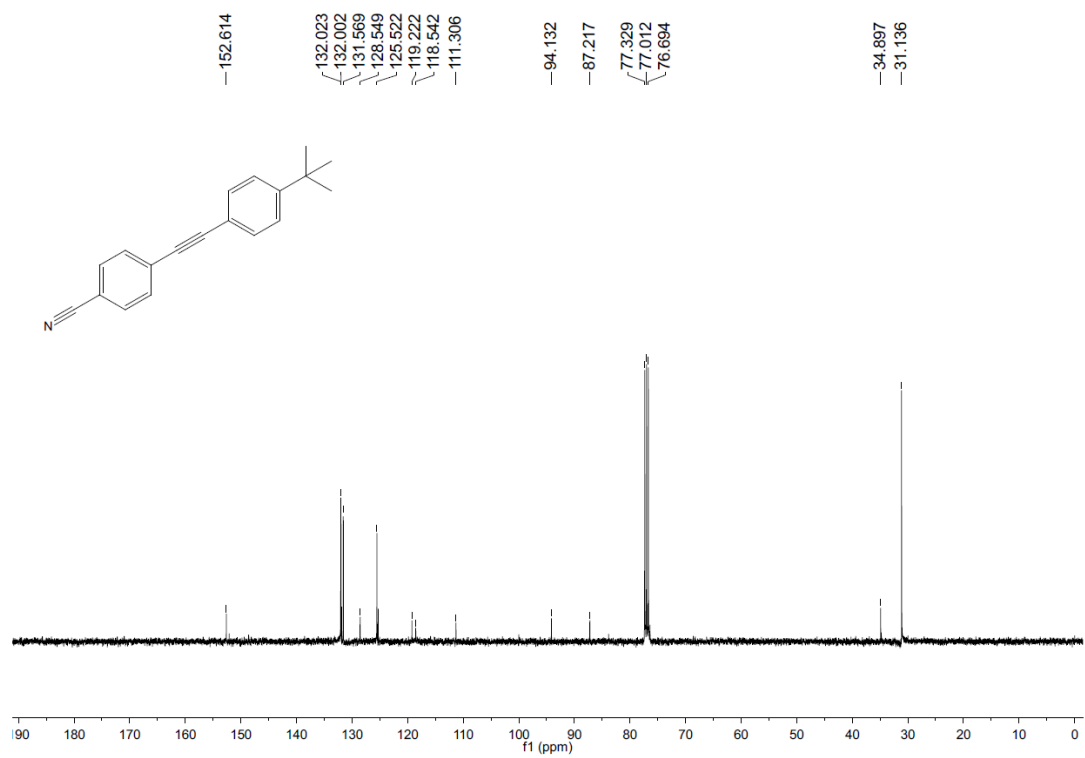

<sup>1</sup>H NMR and <sup>13</sup>C NMR spectra of compounds **3y** (in CDCl<sub>3</sub>)

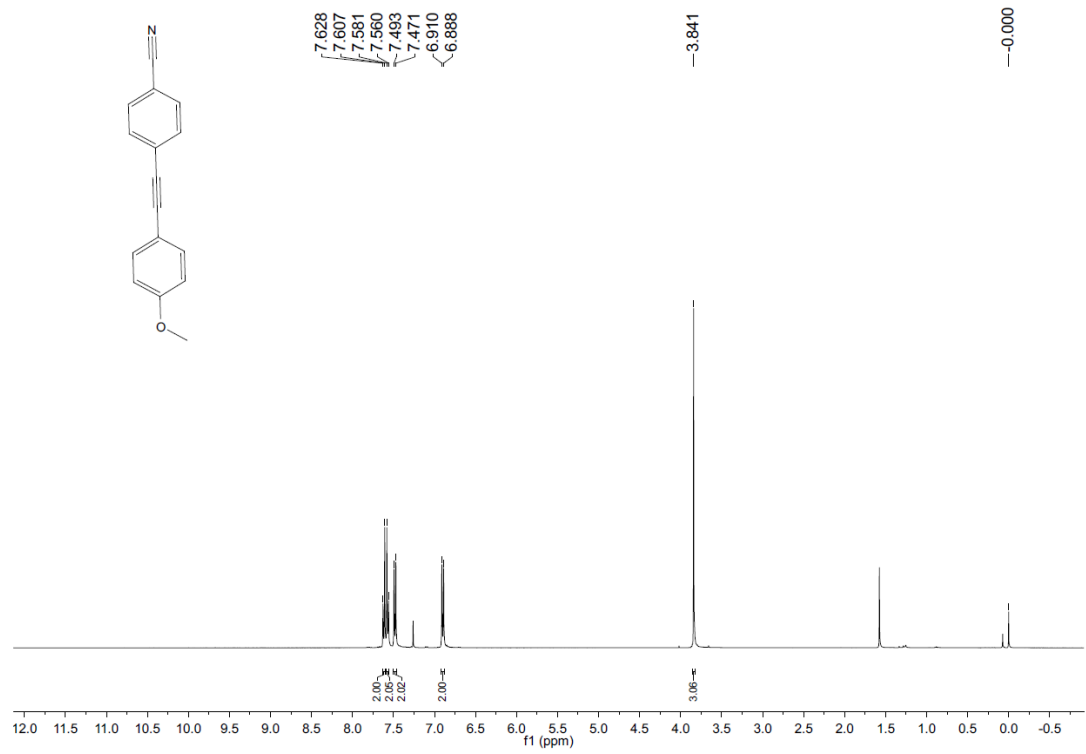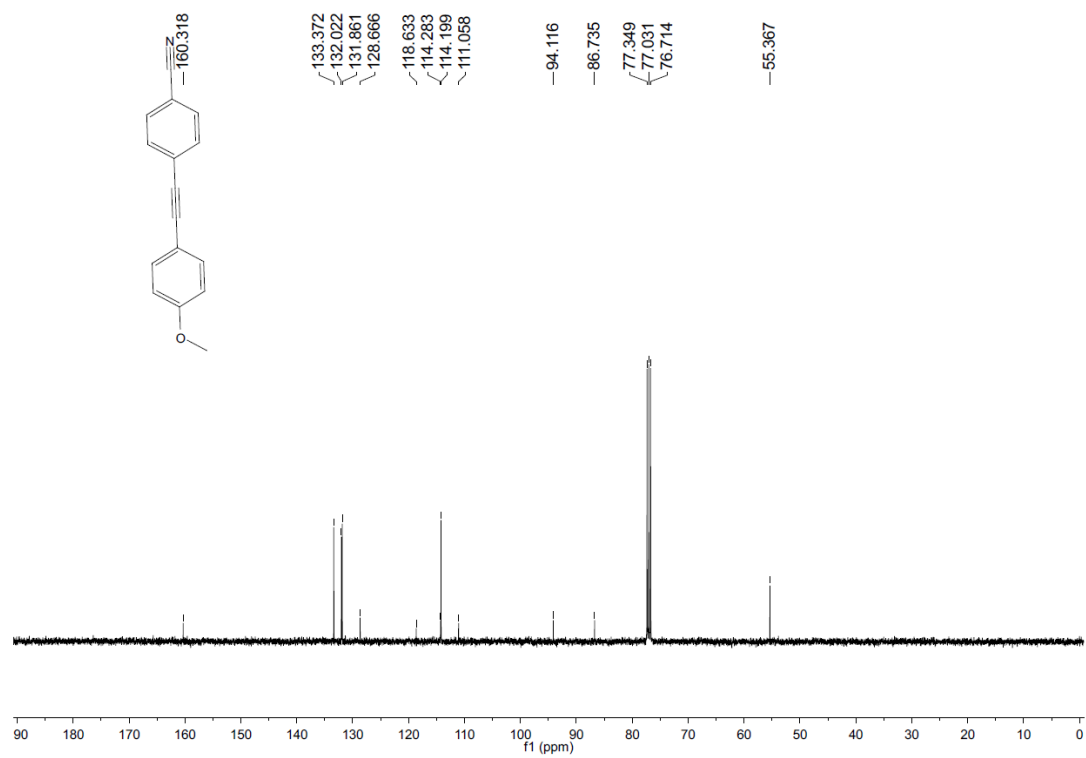

<sup>1</sup>H NMR and <sup>13</sup>C NMR spectra of compounds **3z** (in CDCl<sub>3</sub>)

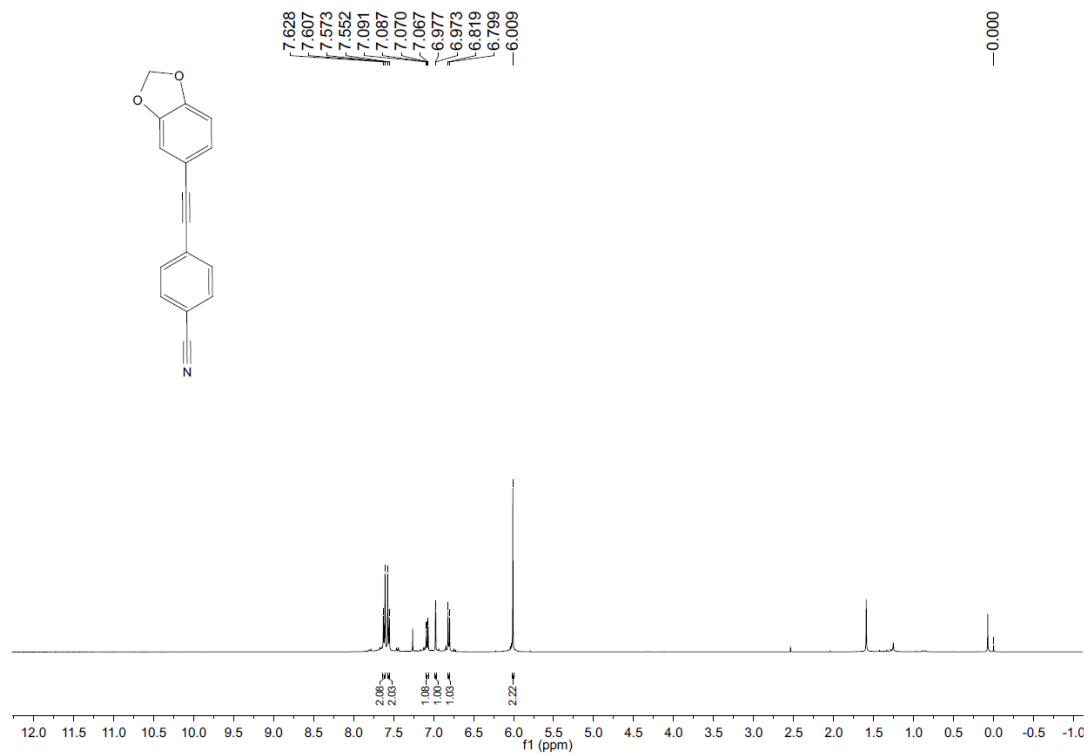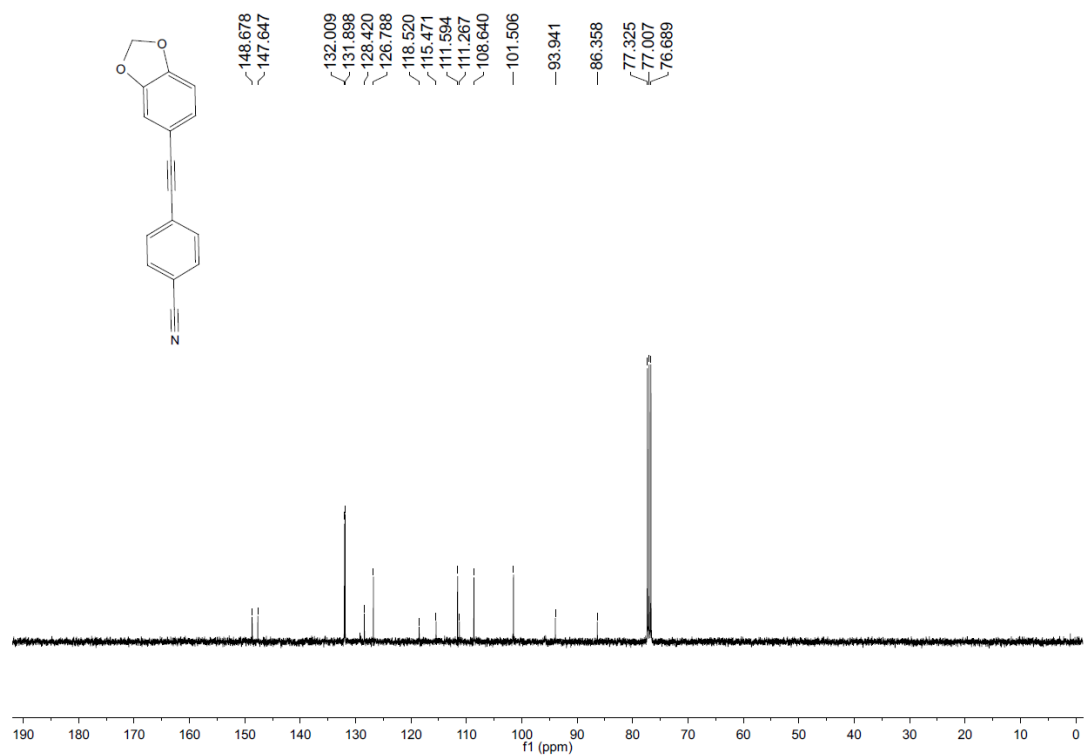

$^1\text{H}$  NMR and  $^{13}\text{C}$  NMR spectra of compounds **3a'** (in  $\text{CDCl}_3$ )

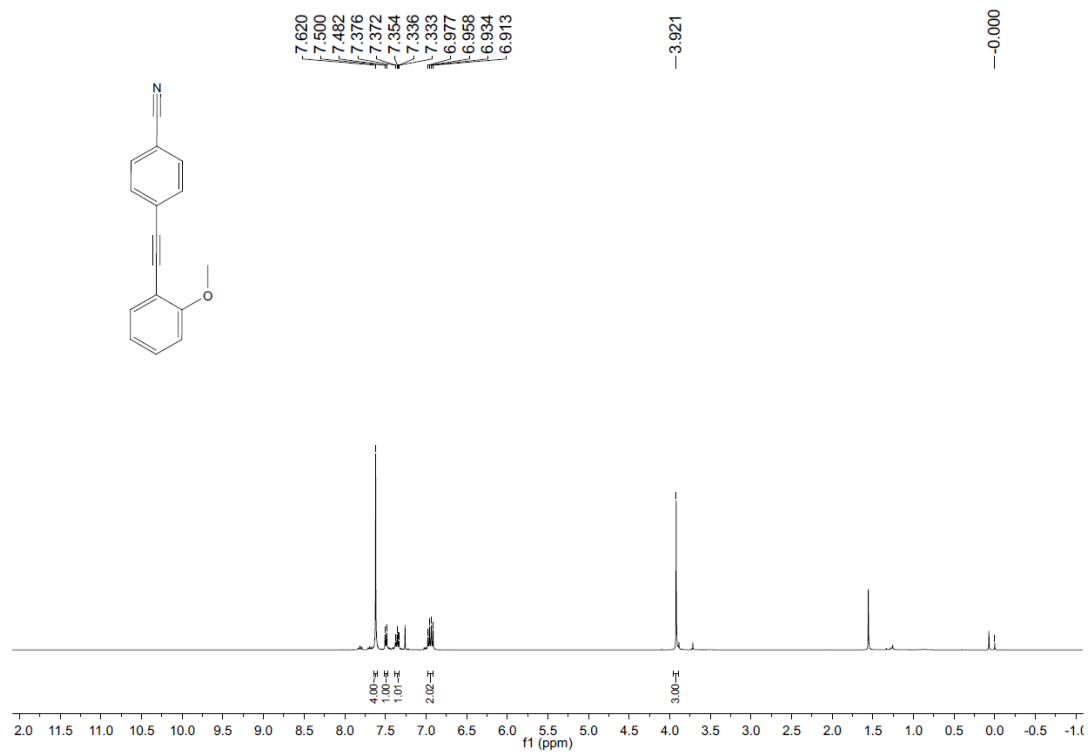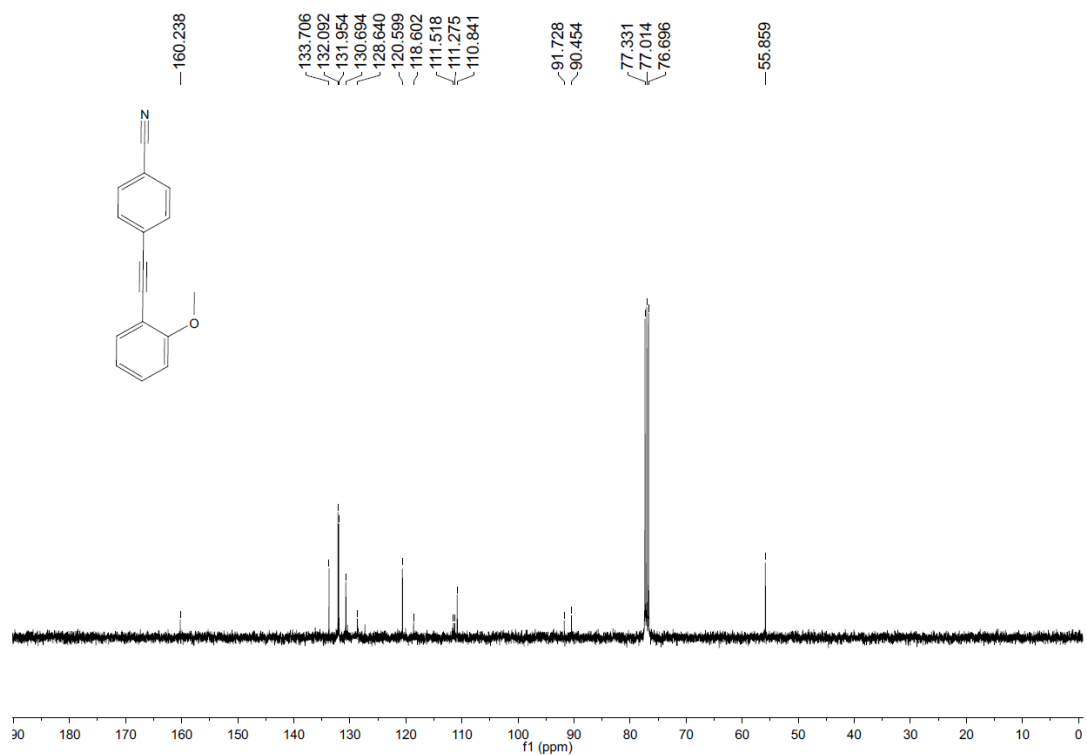

<sup>1</sup>H NMR and <sup>13</sup>C NMR spectra of compounds **3b'** (in CDCl<sub>3</sub>)

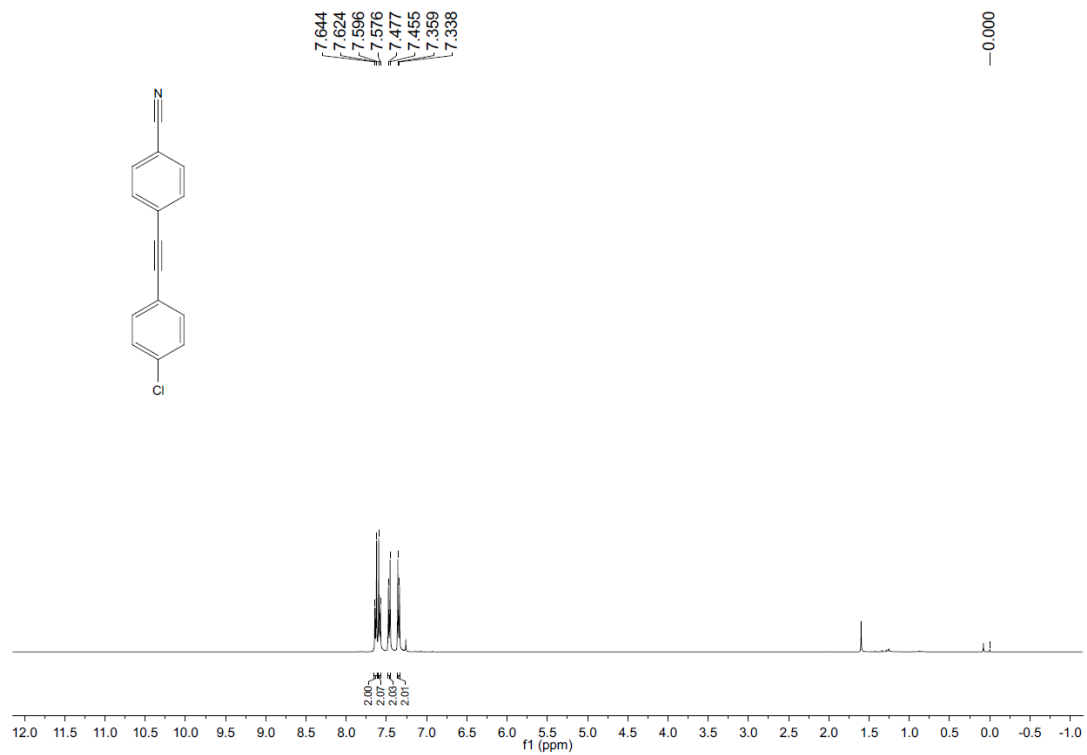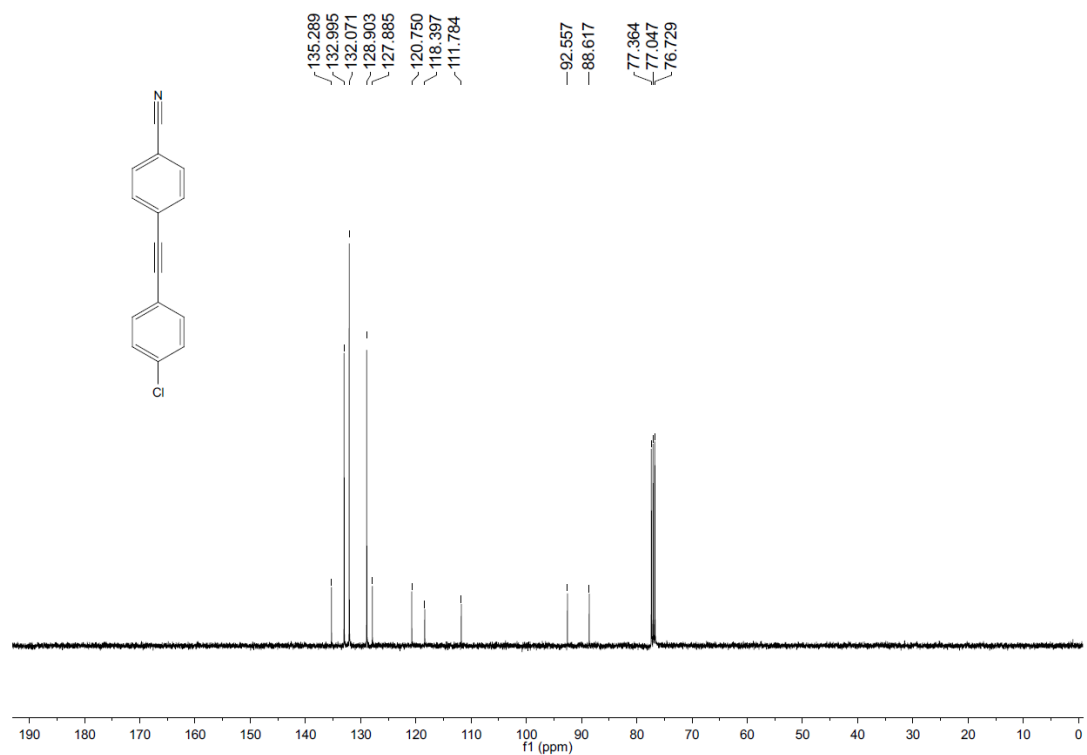

$^1\text{H}$  NMR and  $^{13}\text{C}$  NMR spectra of compounds **3c'** (in  $\text{CDCl}_3$ )

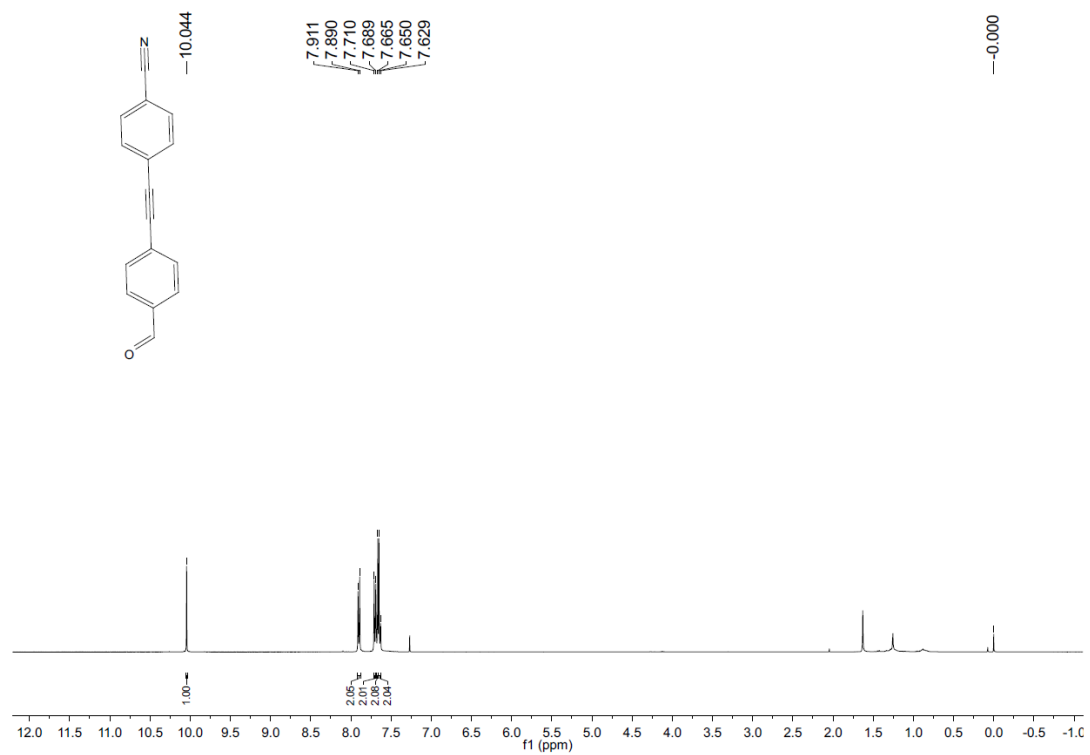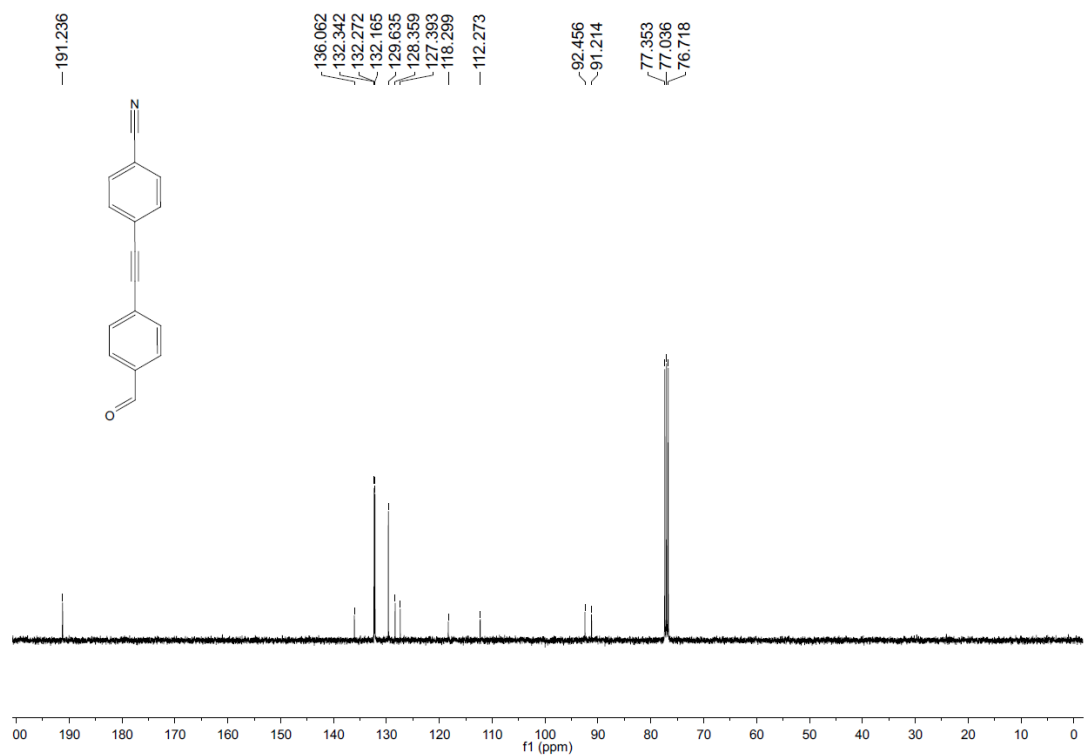

<sup>1</sup>H NMR and <sup>13</sup>C NMR spectra of compounds **3d'** (in CDCl<sub>3</sub>)

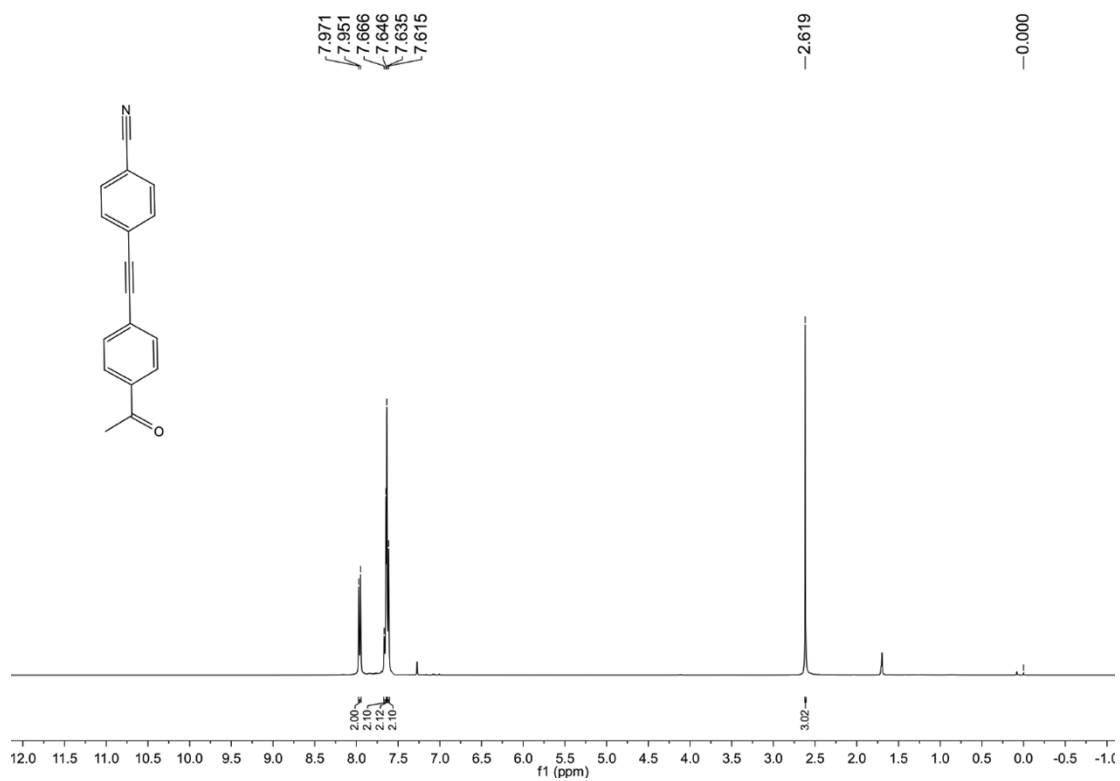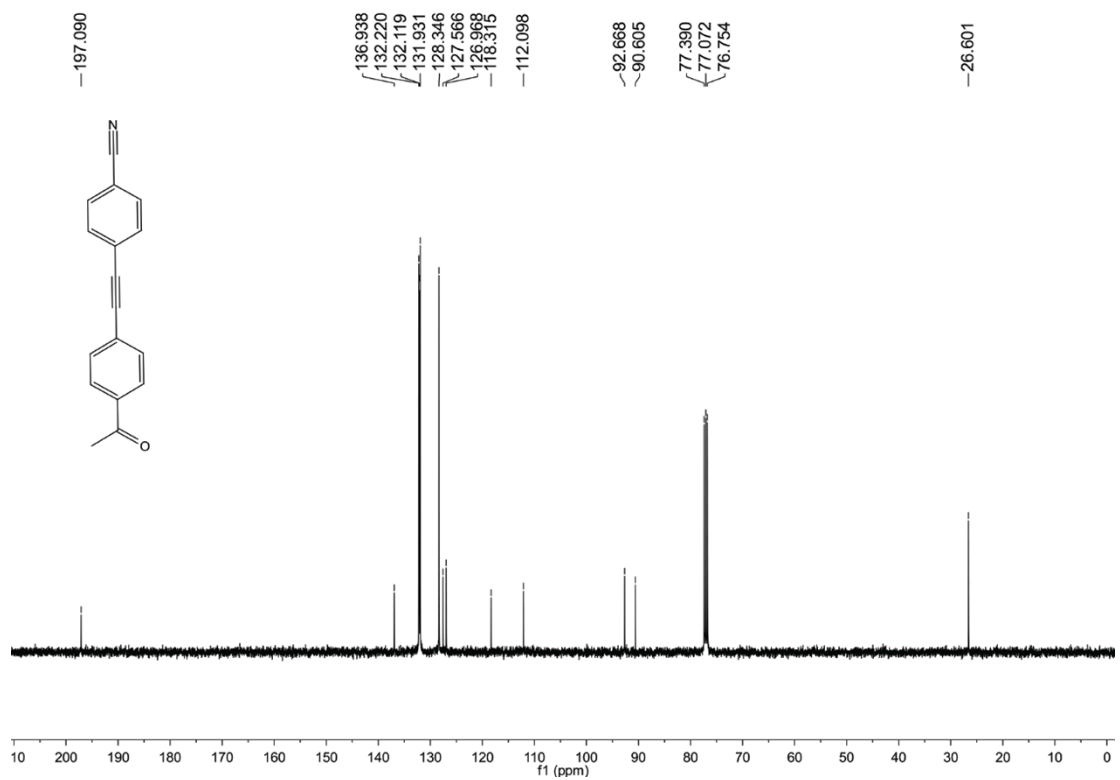

<sup>1</sup>H NMR and <sup>13</sup>C NMR spectra of compounds **3e'** (in CDCl<sub>3</sub>)



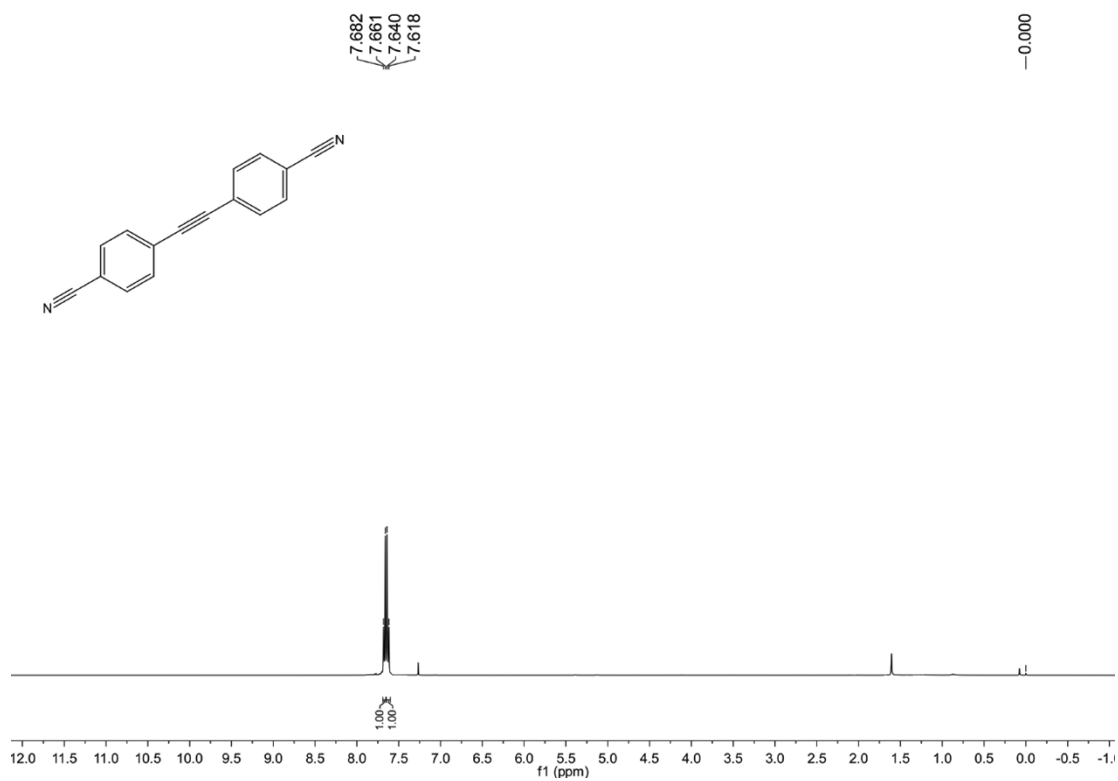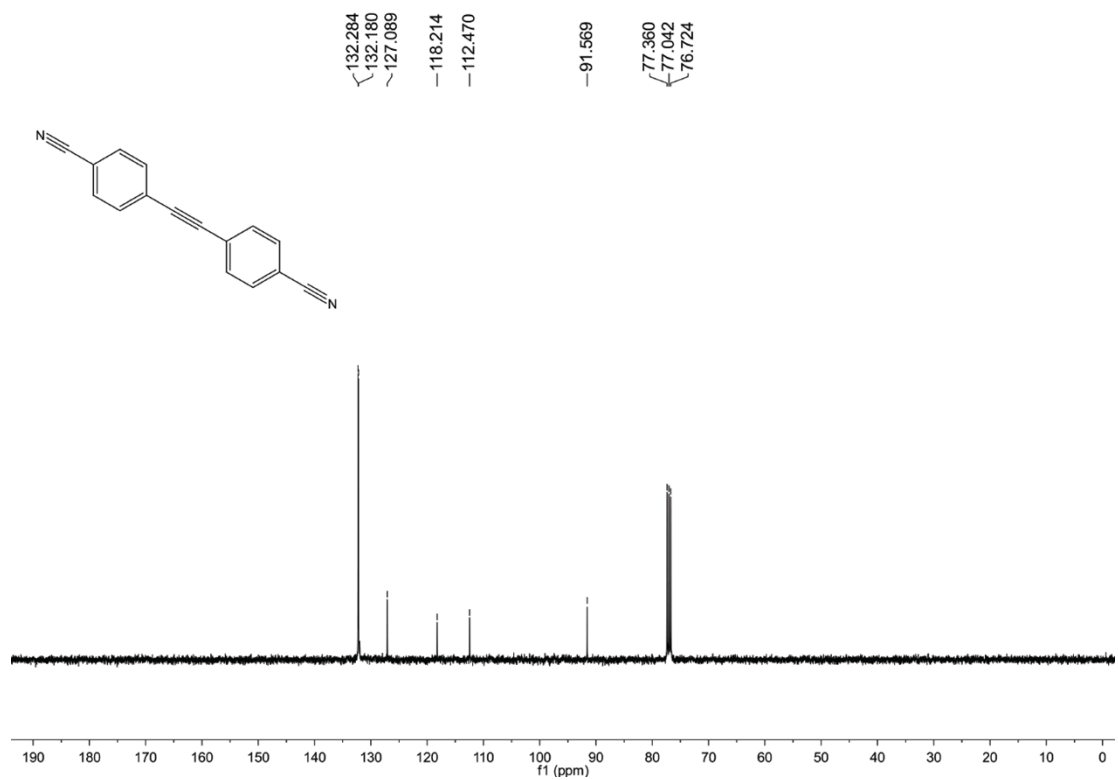

<sup>1</sup>H NMR and <sup>13</sup>C NMR spectra of compounds **3f'** (in CDCl<sub>3</sub>)

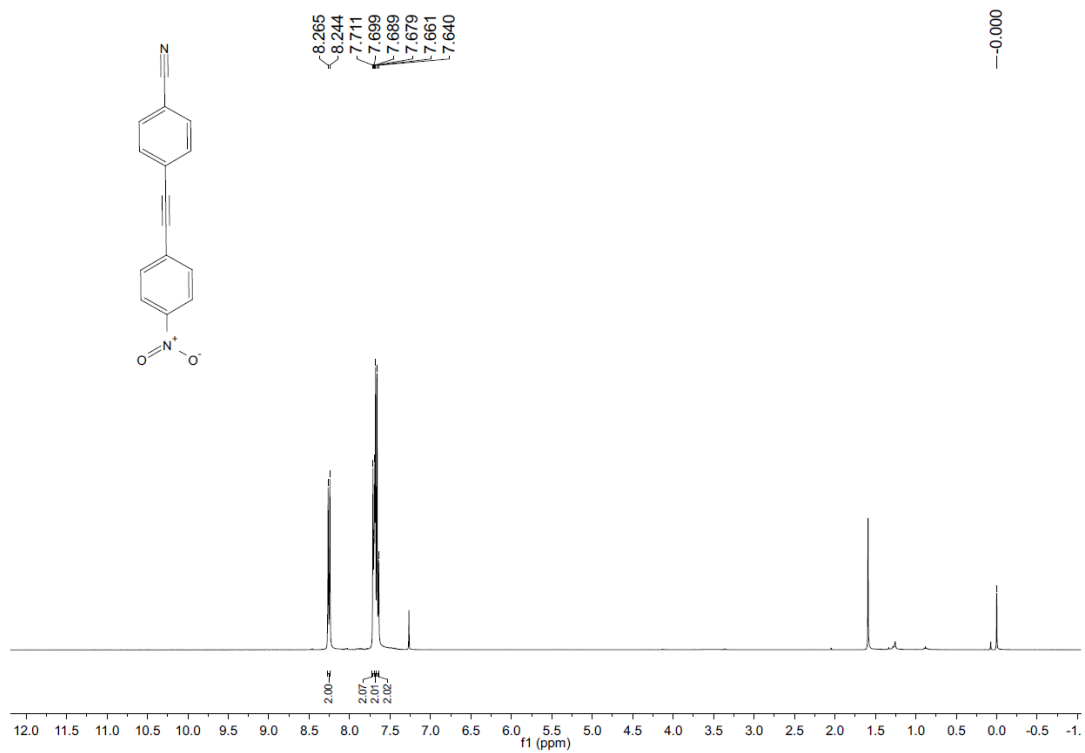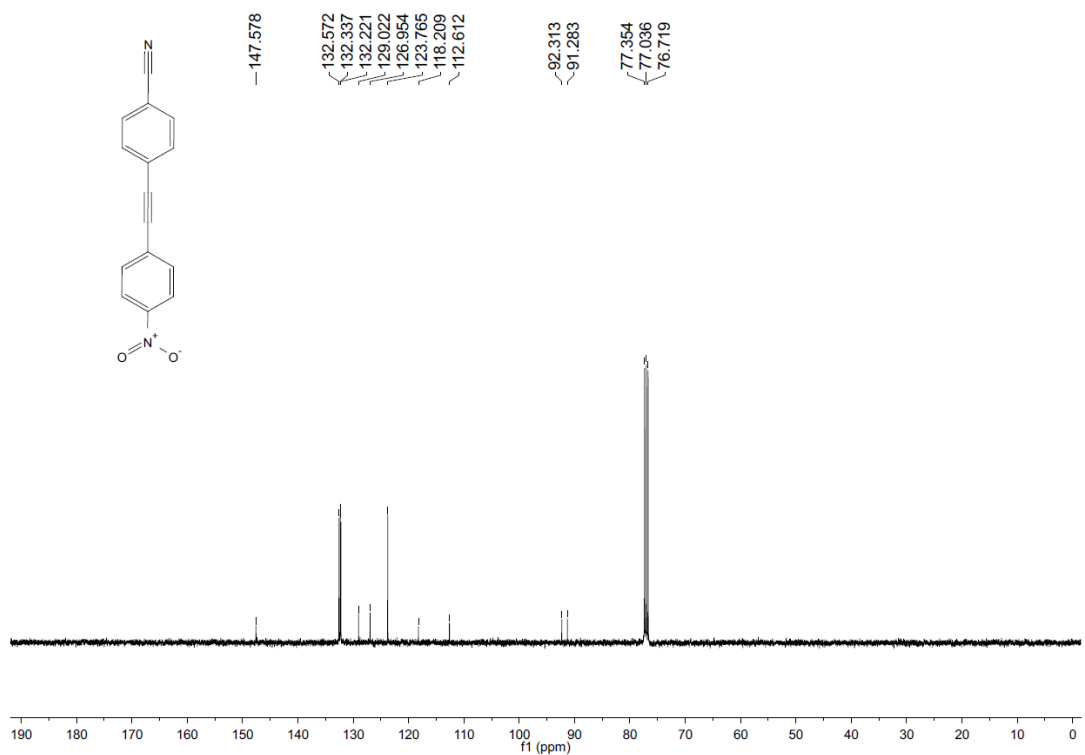

<sup>1</sup>H NMR and <sup>13</sup>C NMR spectra of compounds **3g'** (in CDCl<sub>3</sub>)

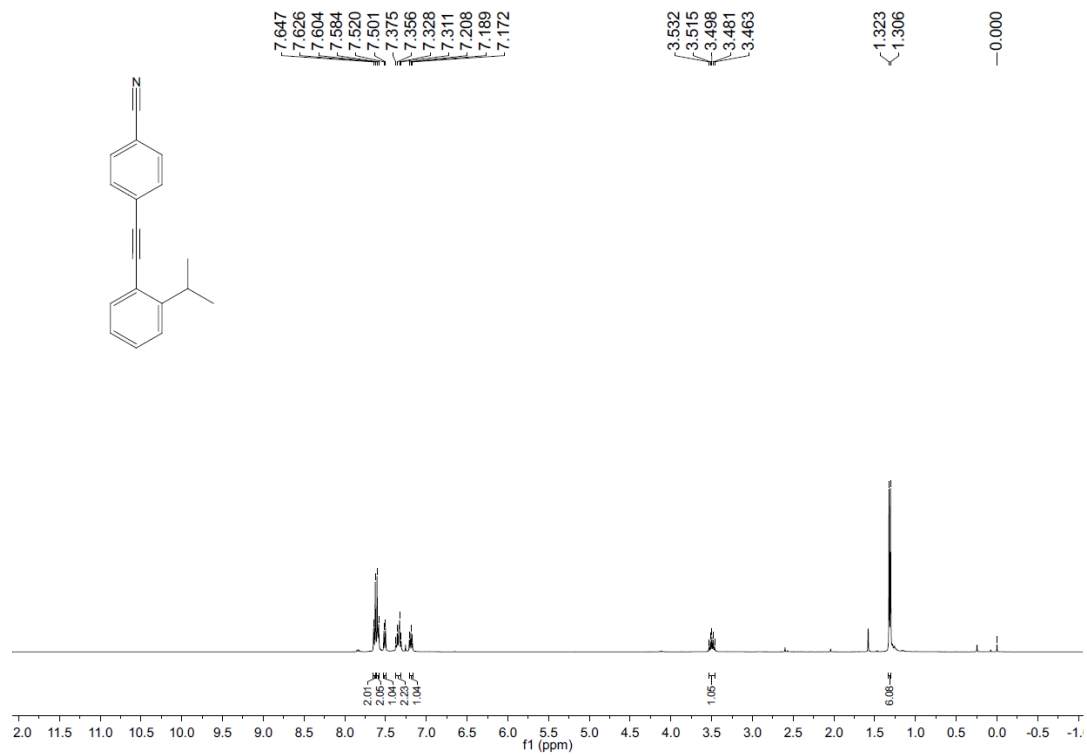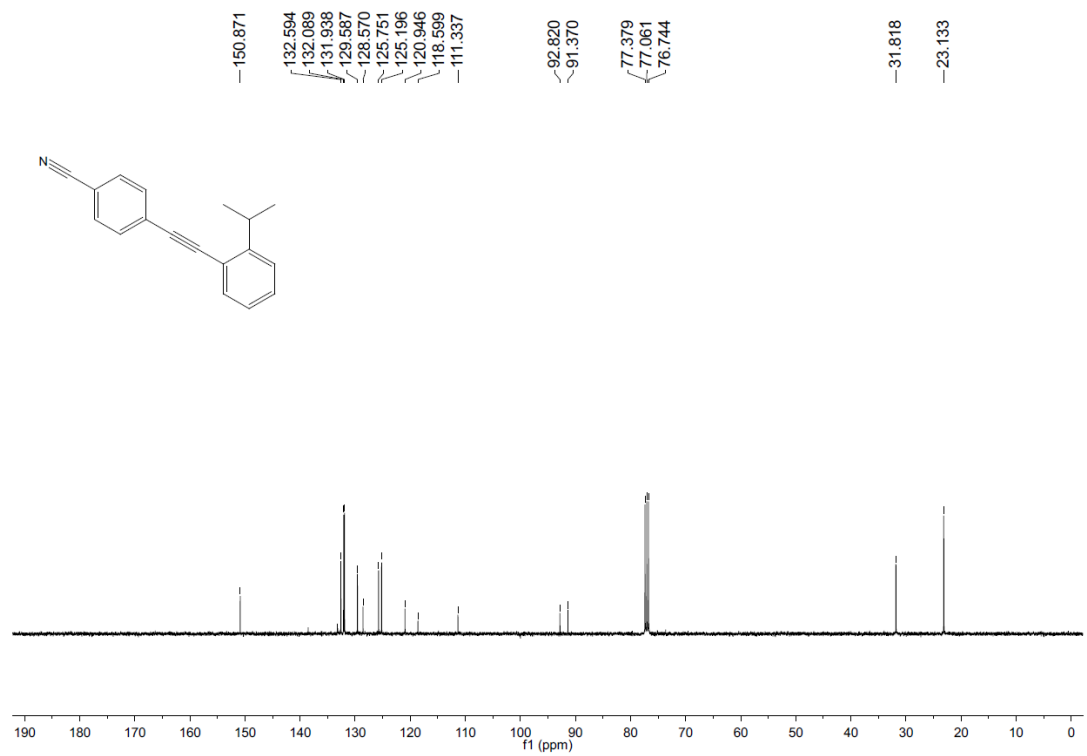

<sup>1</sup>H NMR and <sup>13</sup>C NMR spectra of compounds **3h'** (in CDCl<sub>3</sub>)

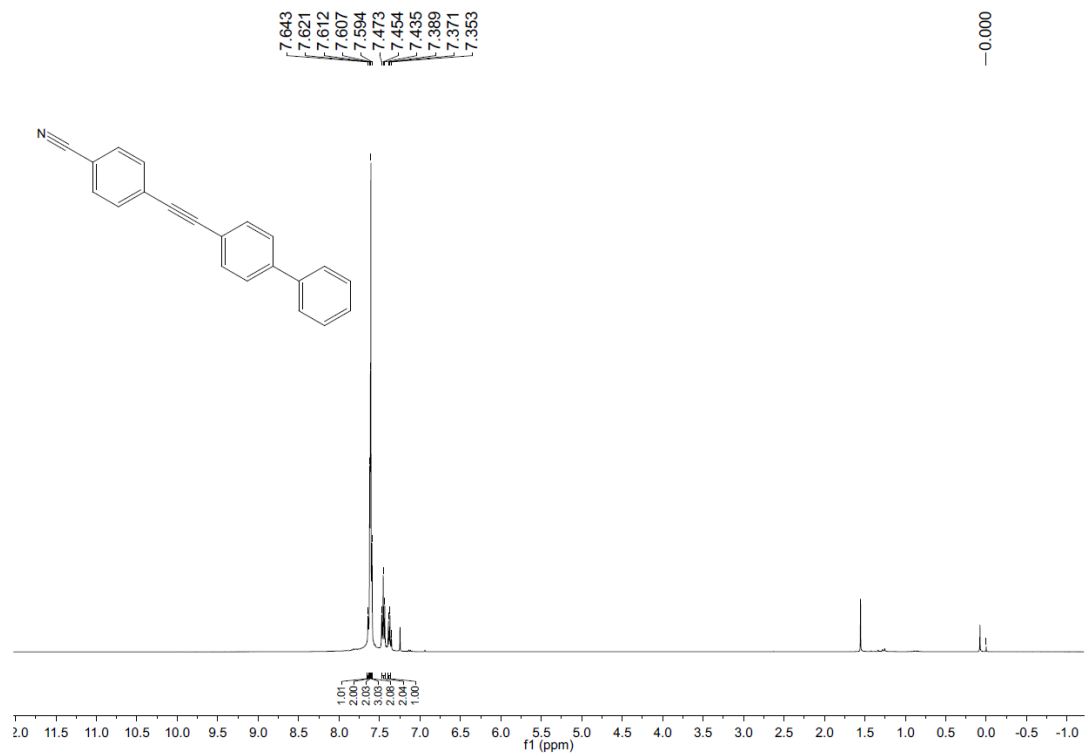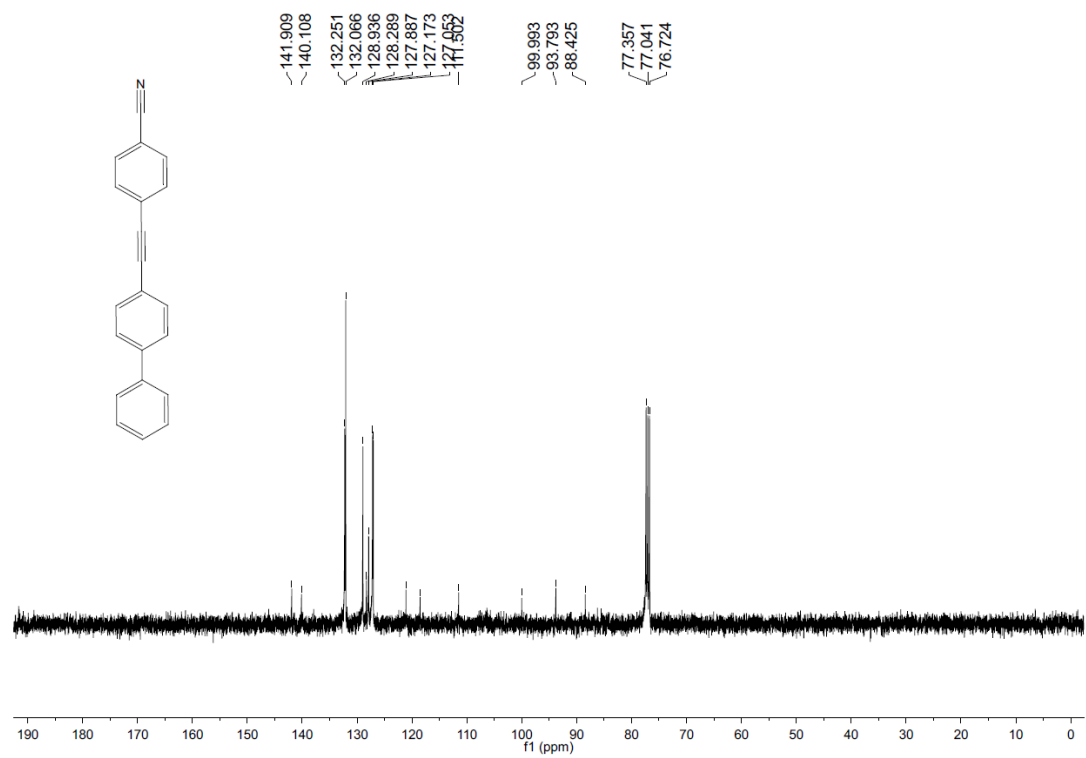

<sup>1</sup>H NMR and <sup>13</sup>C NMR spectra of compounds **3i'** (in CDCl<sub>3</sub>)

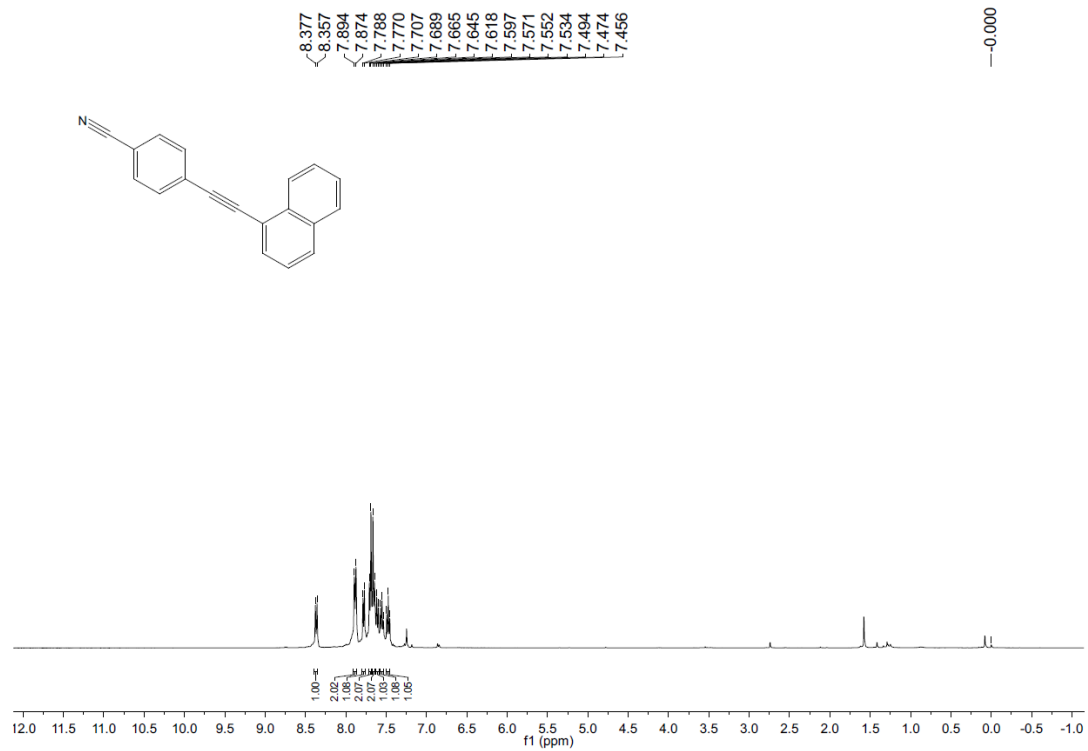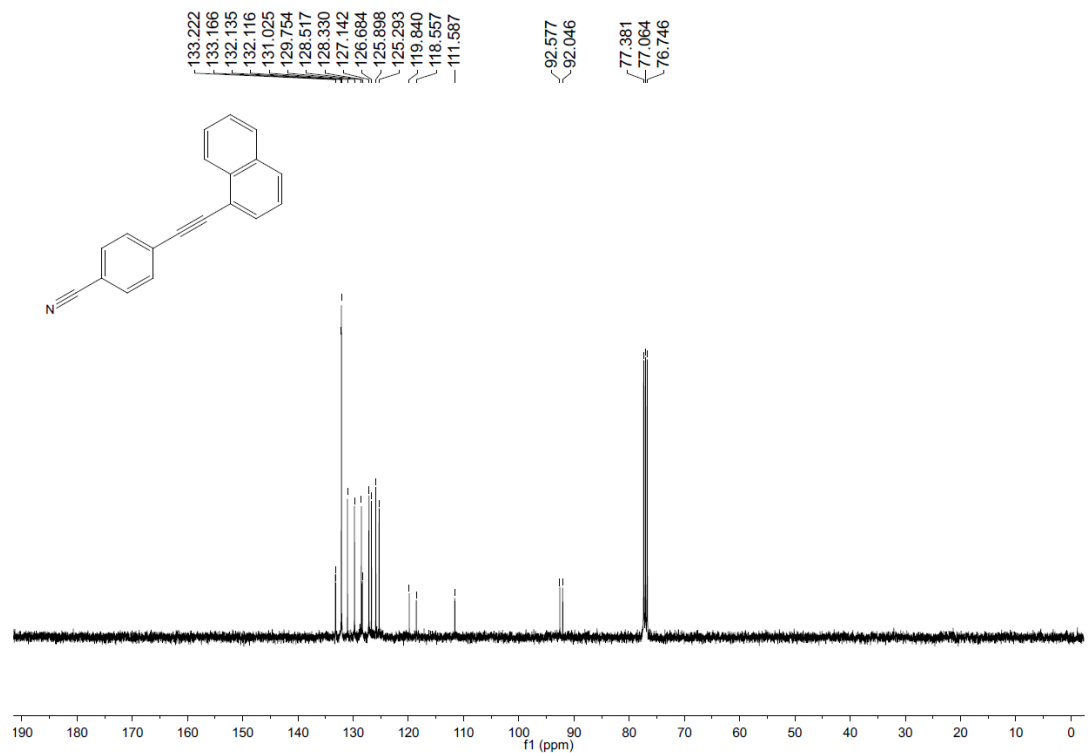

<sup>1</sup>H NMR and <sup>13</sup>C NMR spectra of compounds **3j'** (in CDCl<sub>3</sub>)

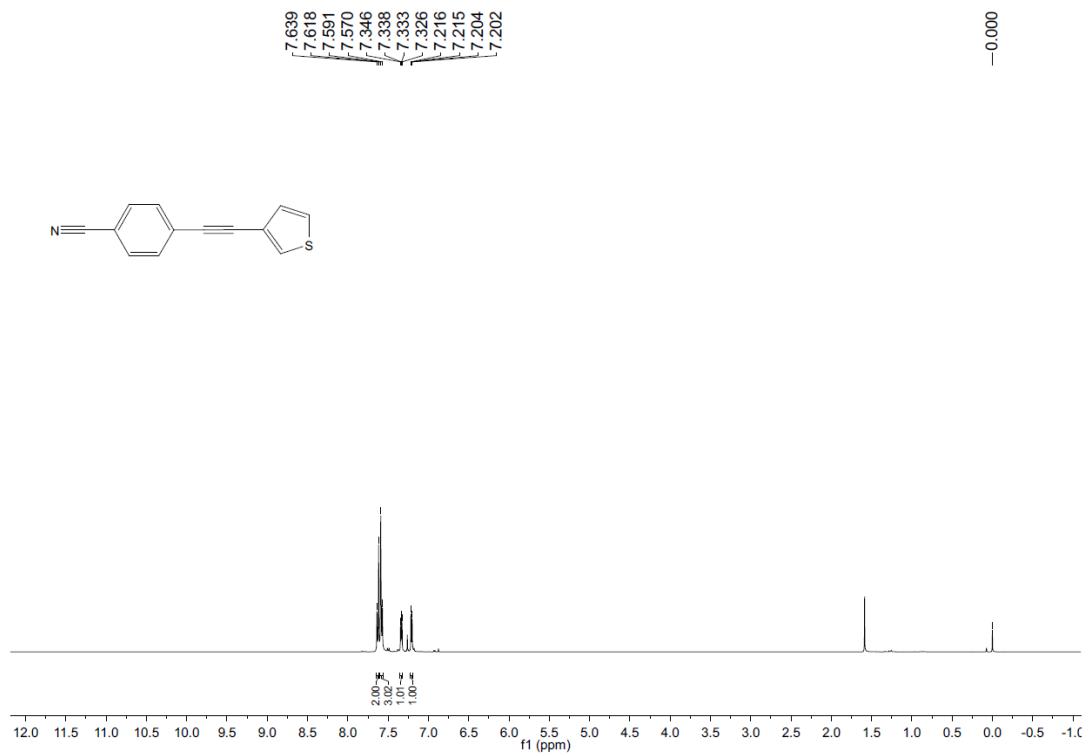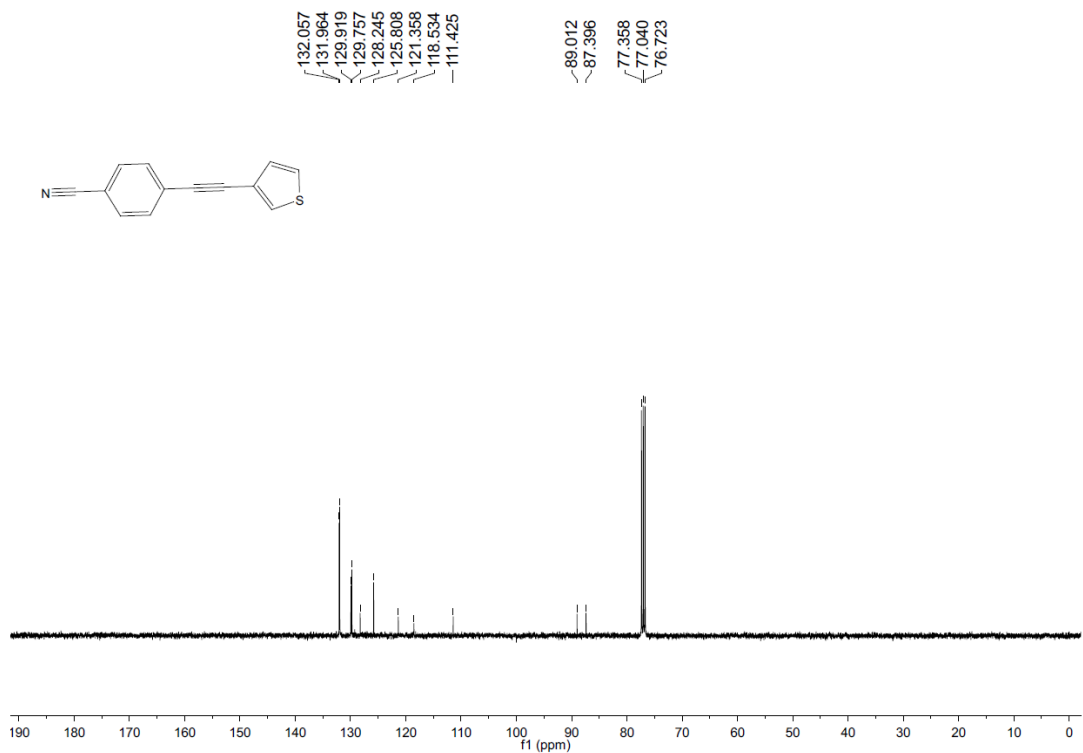

<sup>1</sup>H NMR and <sup>13</sup>C NMR spectra of compounds **3k'** (in CDCl<sub>3</sub>)

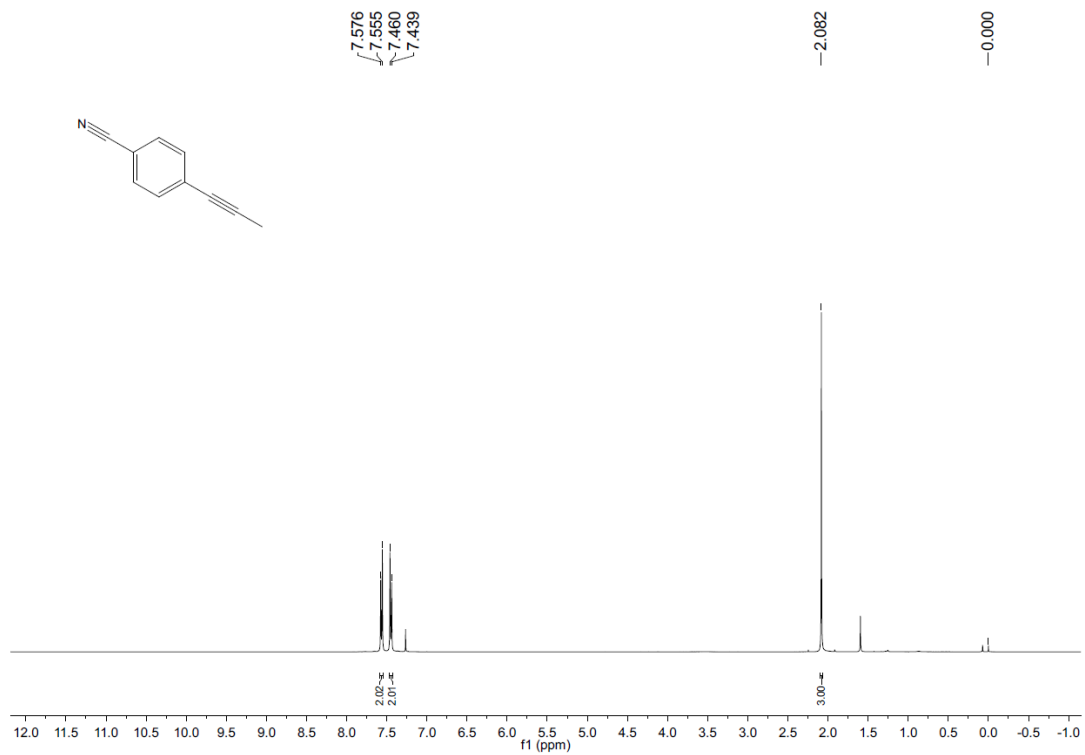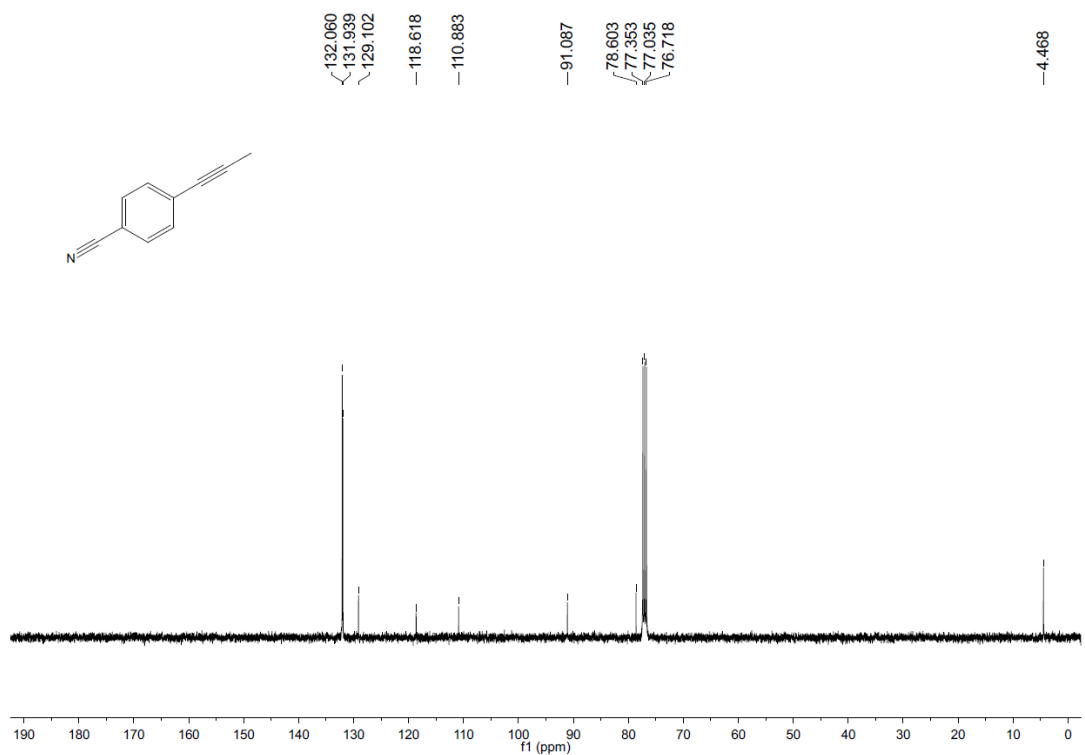

$^1\text{H}$  NMR and  $^{13}\text{C}$  NMR spectra of compounds **31'** (in  $\text{CDCl}_3$ )

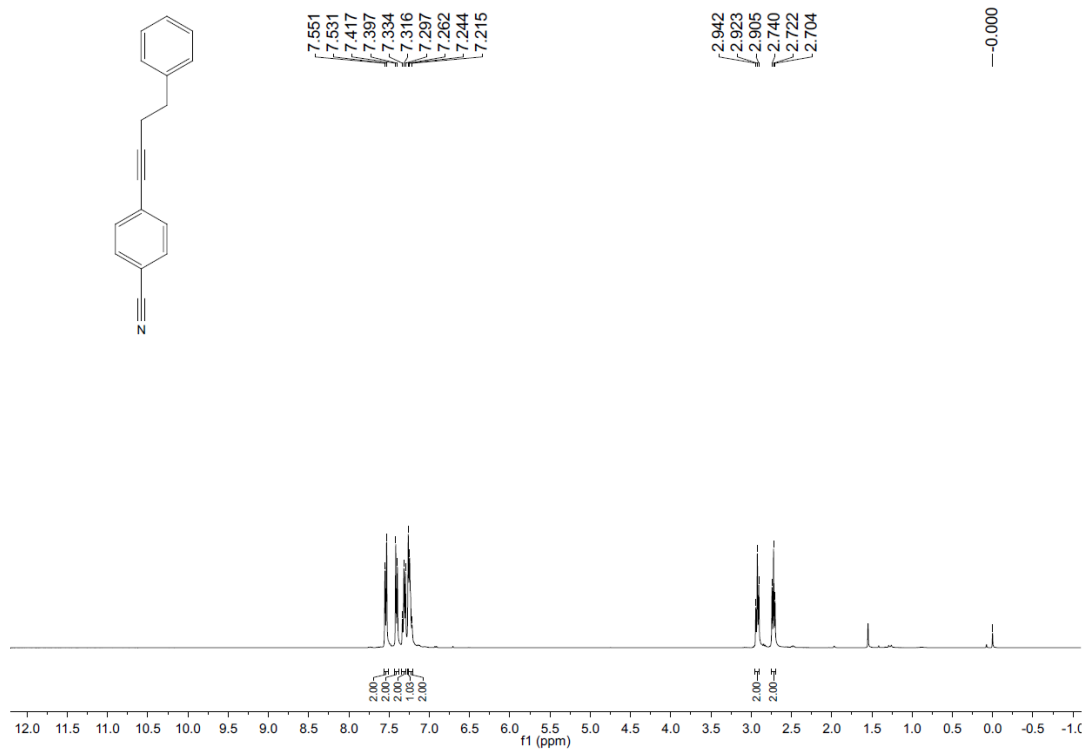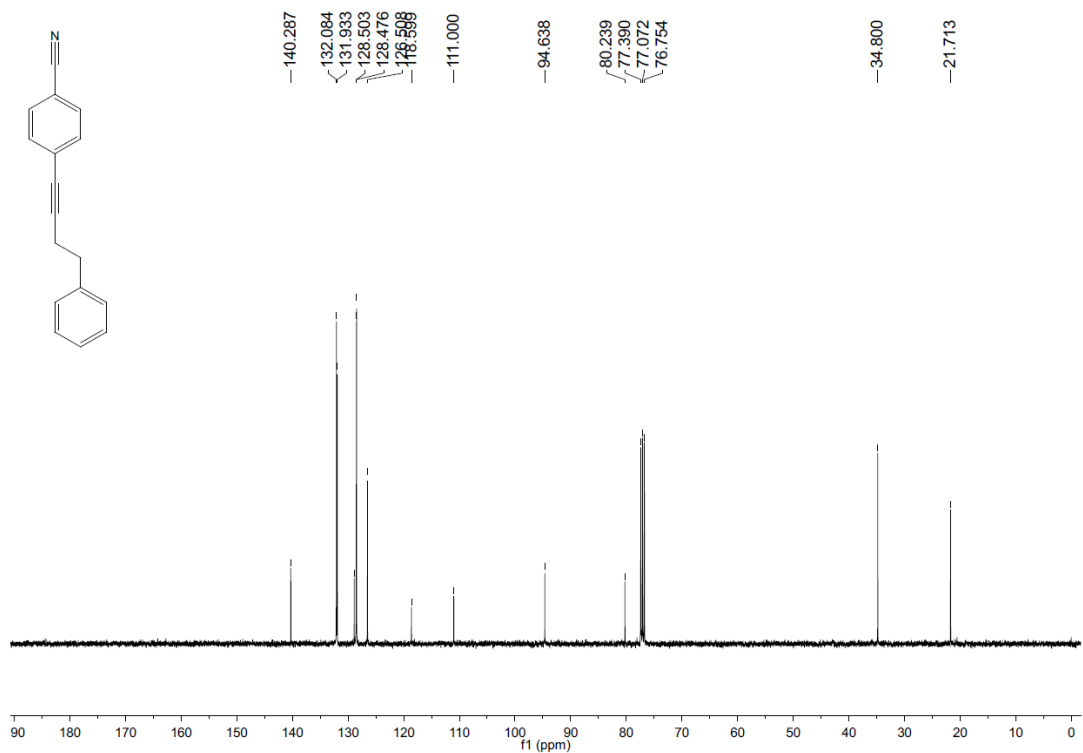

<sup>1</sup>H NMR and <sup>13</sup>C NMR spectra of compounds **3m'** (in CDCl<sub>3</sub>)



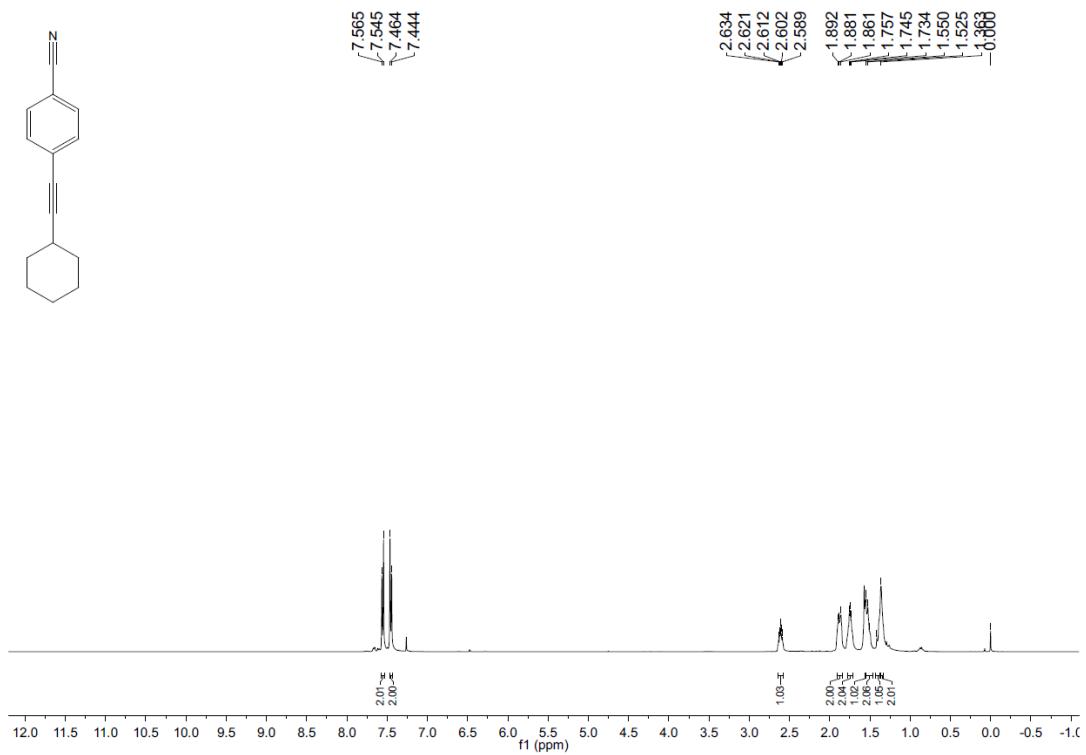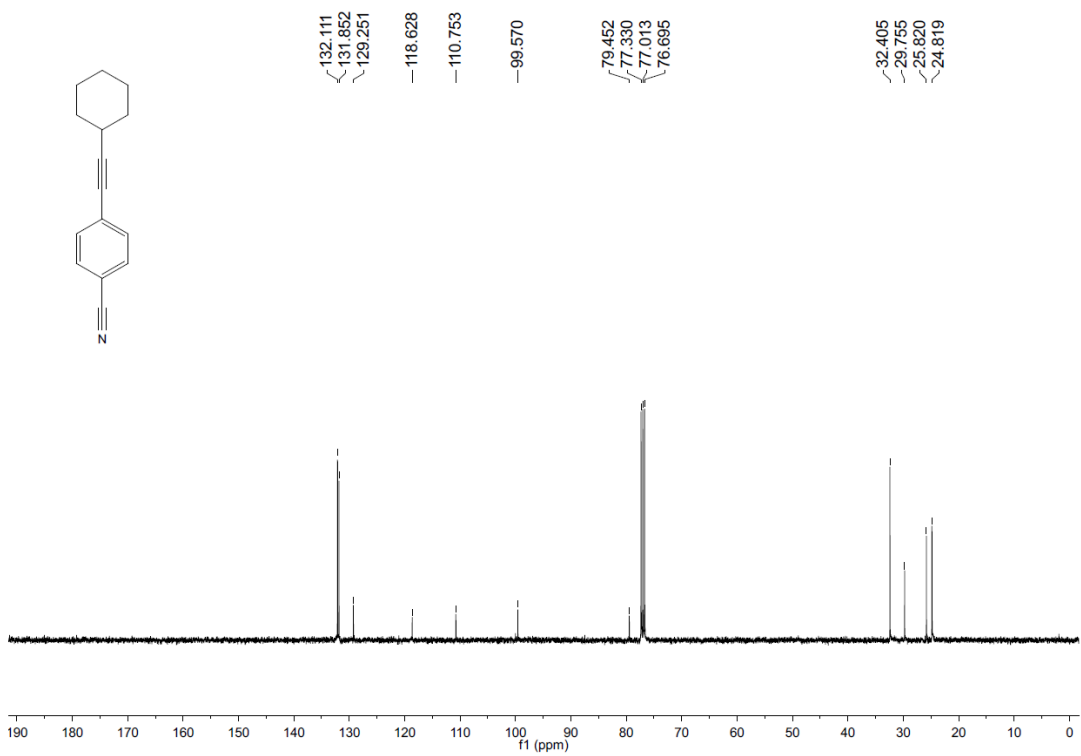

<sup>1</sup>H NMR and <sup>13</sup>C NMR spectra of compounds **3n'** (in CDCl<sub>3</sub>)

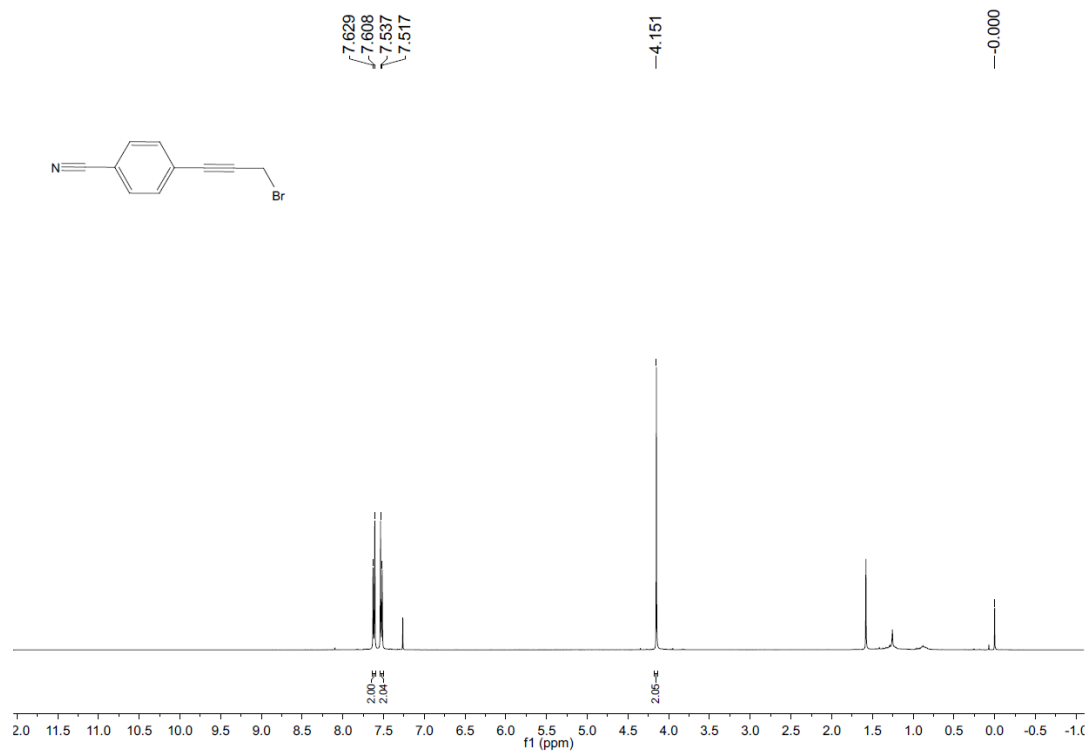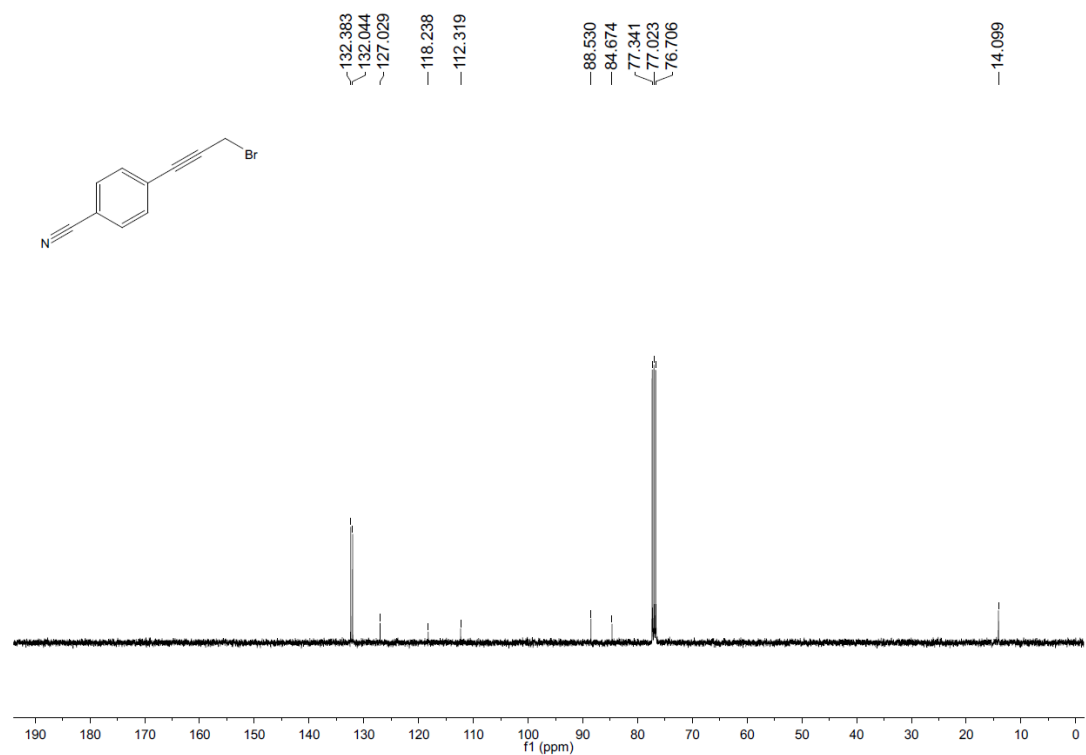

<sup>1</sup>H NMR and <sup>13</sup>C NMR spectra of compounds **30'** (in CDCl<sub>3</sub>)

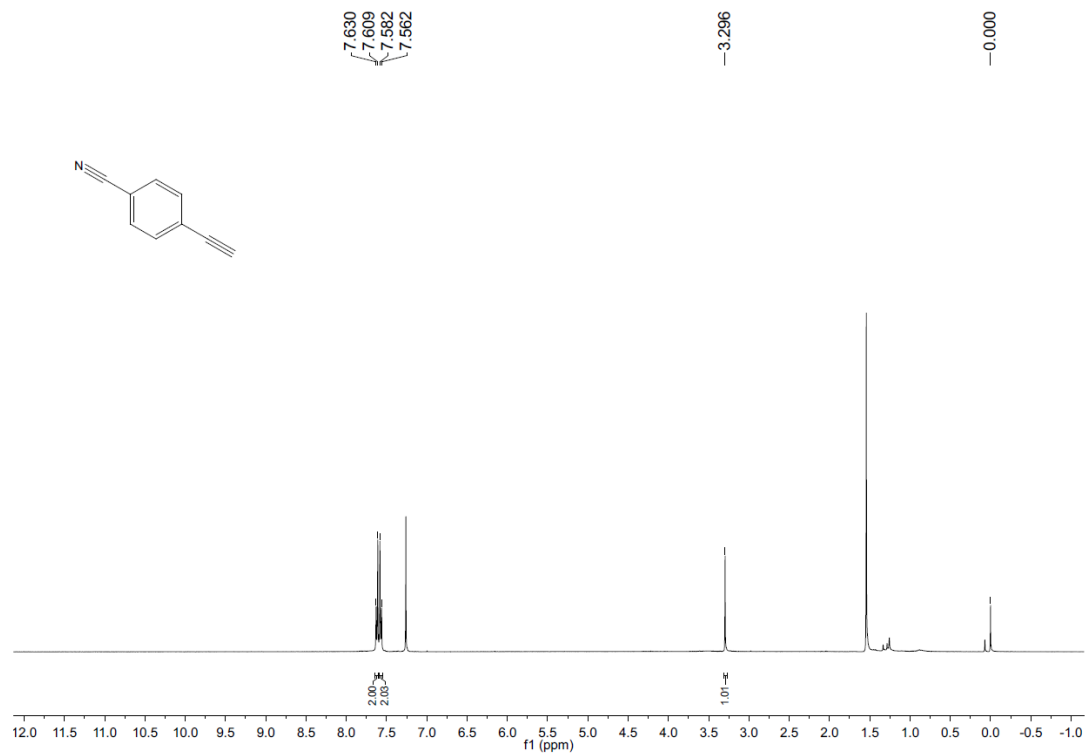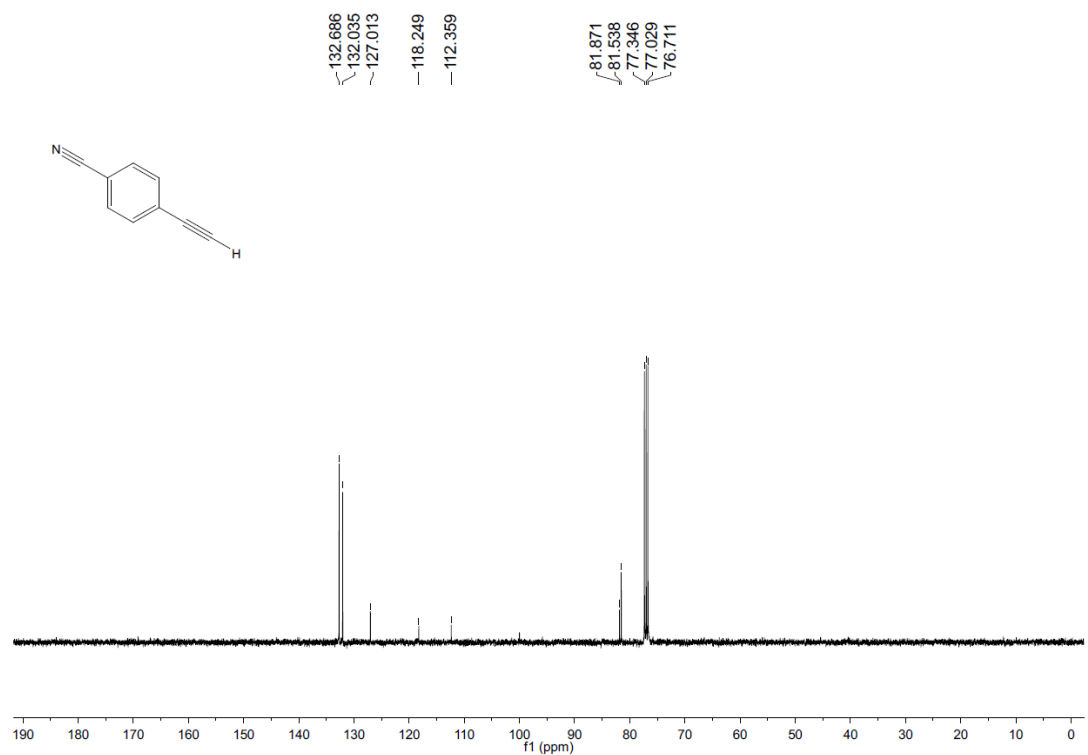

<sup>1</sup>H NMR and <sup>13</sup>C NMR spectra of compounds **3p'** (in CDCl<sub>3</sub>)

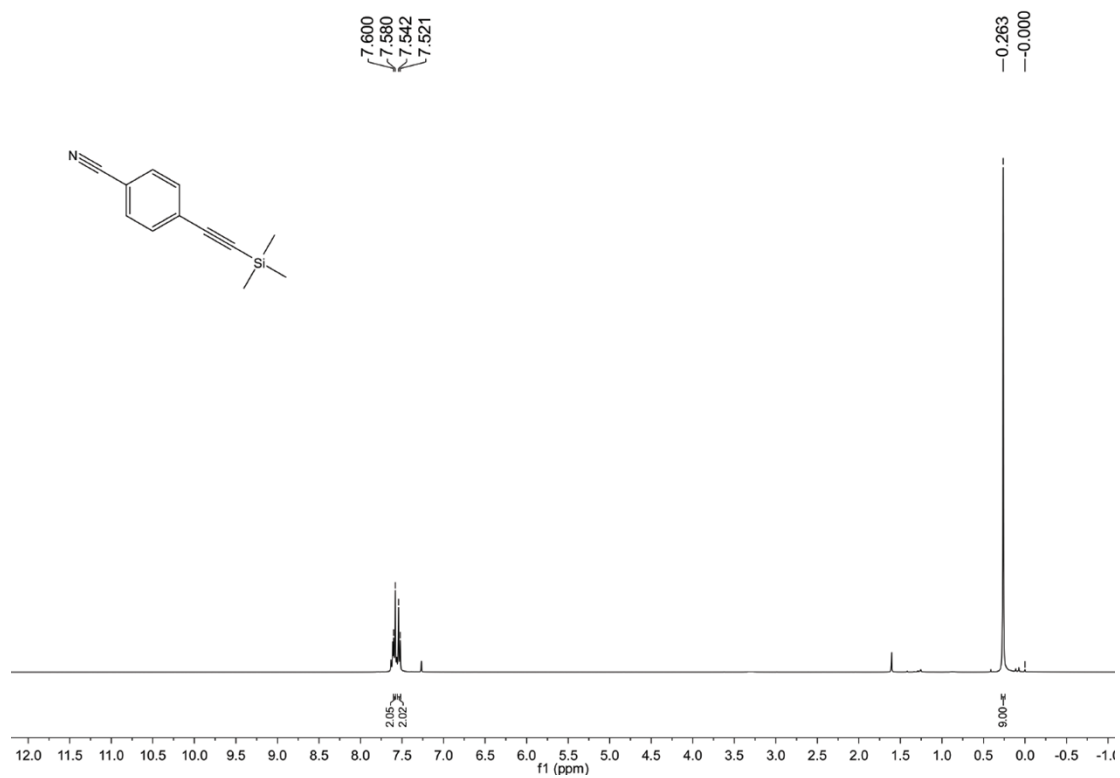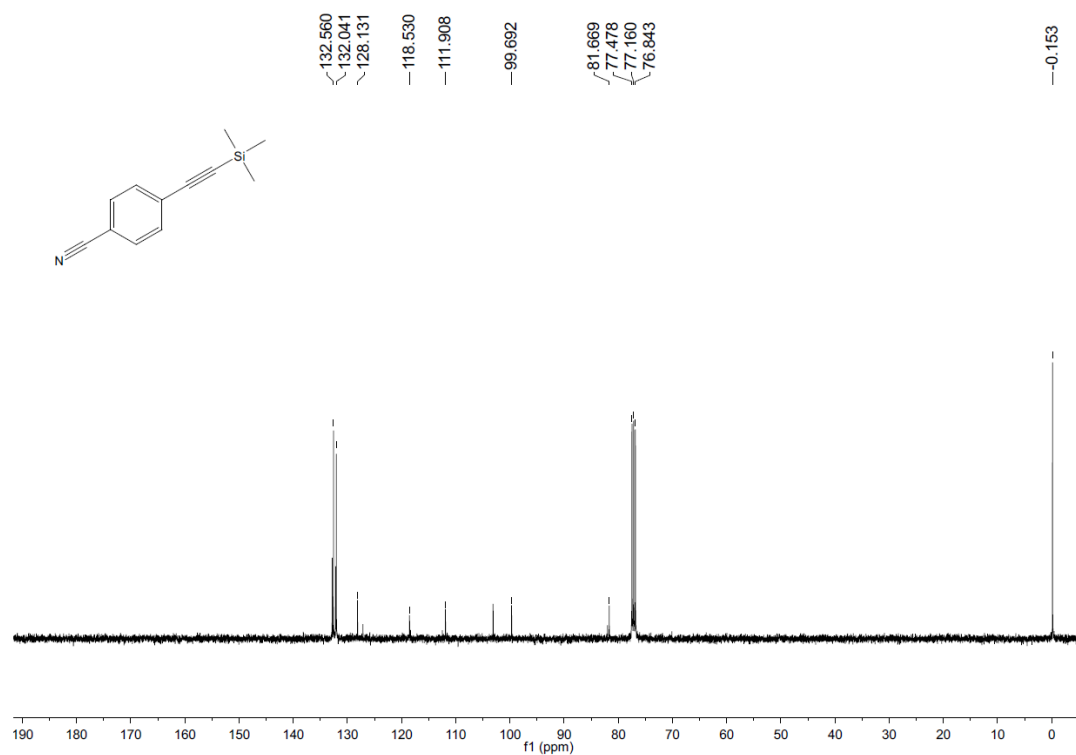

<sup>1</sup>H NMR and <sup>13</sup>C NMR spectra of compounds **3q'** (in CDCl<sub>3</sub>)
